# Supplementary material for: ULK1-ATG13 and their mitotic phospho-regulation by CDK1 connect autophagy to cell cycle
Source: PubMed Central journal article supplement (PMC7282624; doi:10.1371/journal.pbio.3000288), 2020-06-09
Supplement: pbio.3000288.s002.pdf [file pbio.3000288.s002.pdf]

# Main Figures

**Fig 1A**

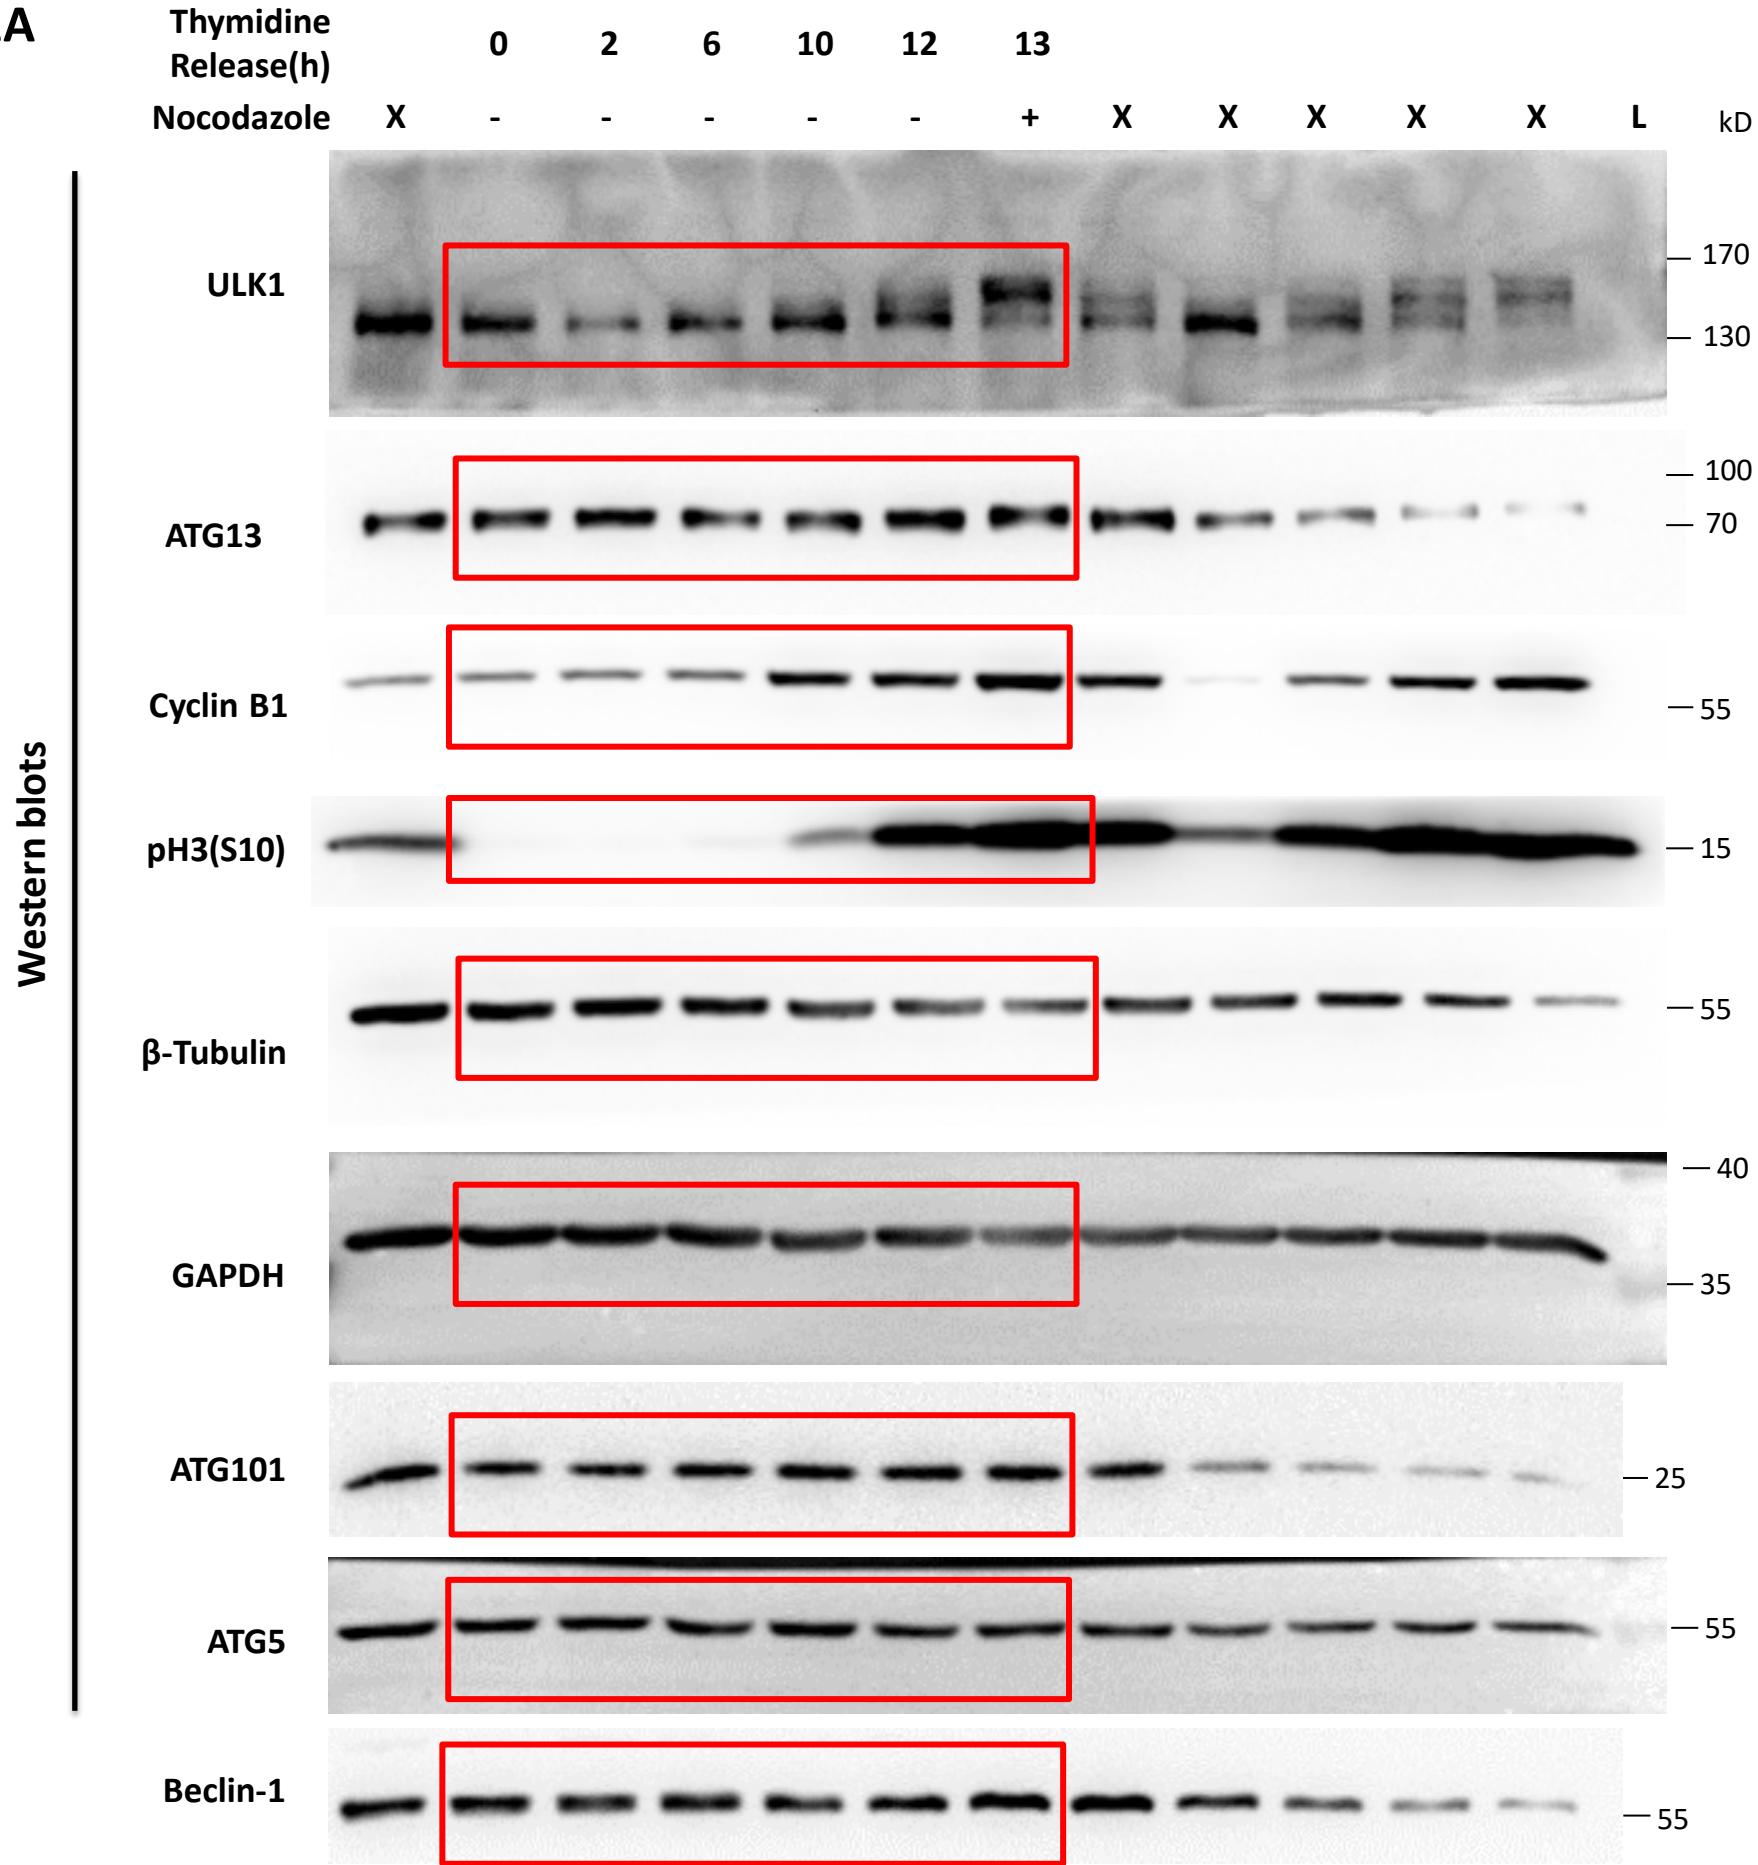

Images were acquired by chemiluminescence CCD camera-based digital imaging instruments (Tanon Fine-do X6). Approx. molecular weight ladder (L) was indicated. PVDF Membranes were cut for immunoblotting of more than one protein.

**Fig 1B**

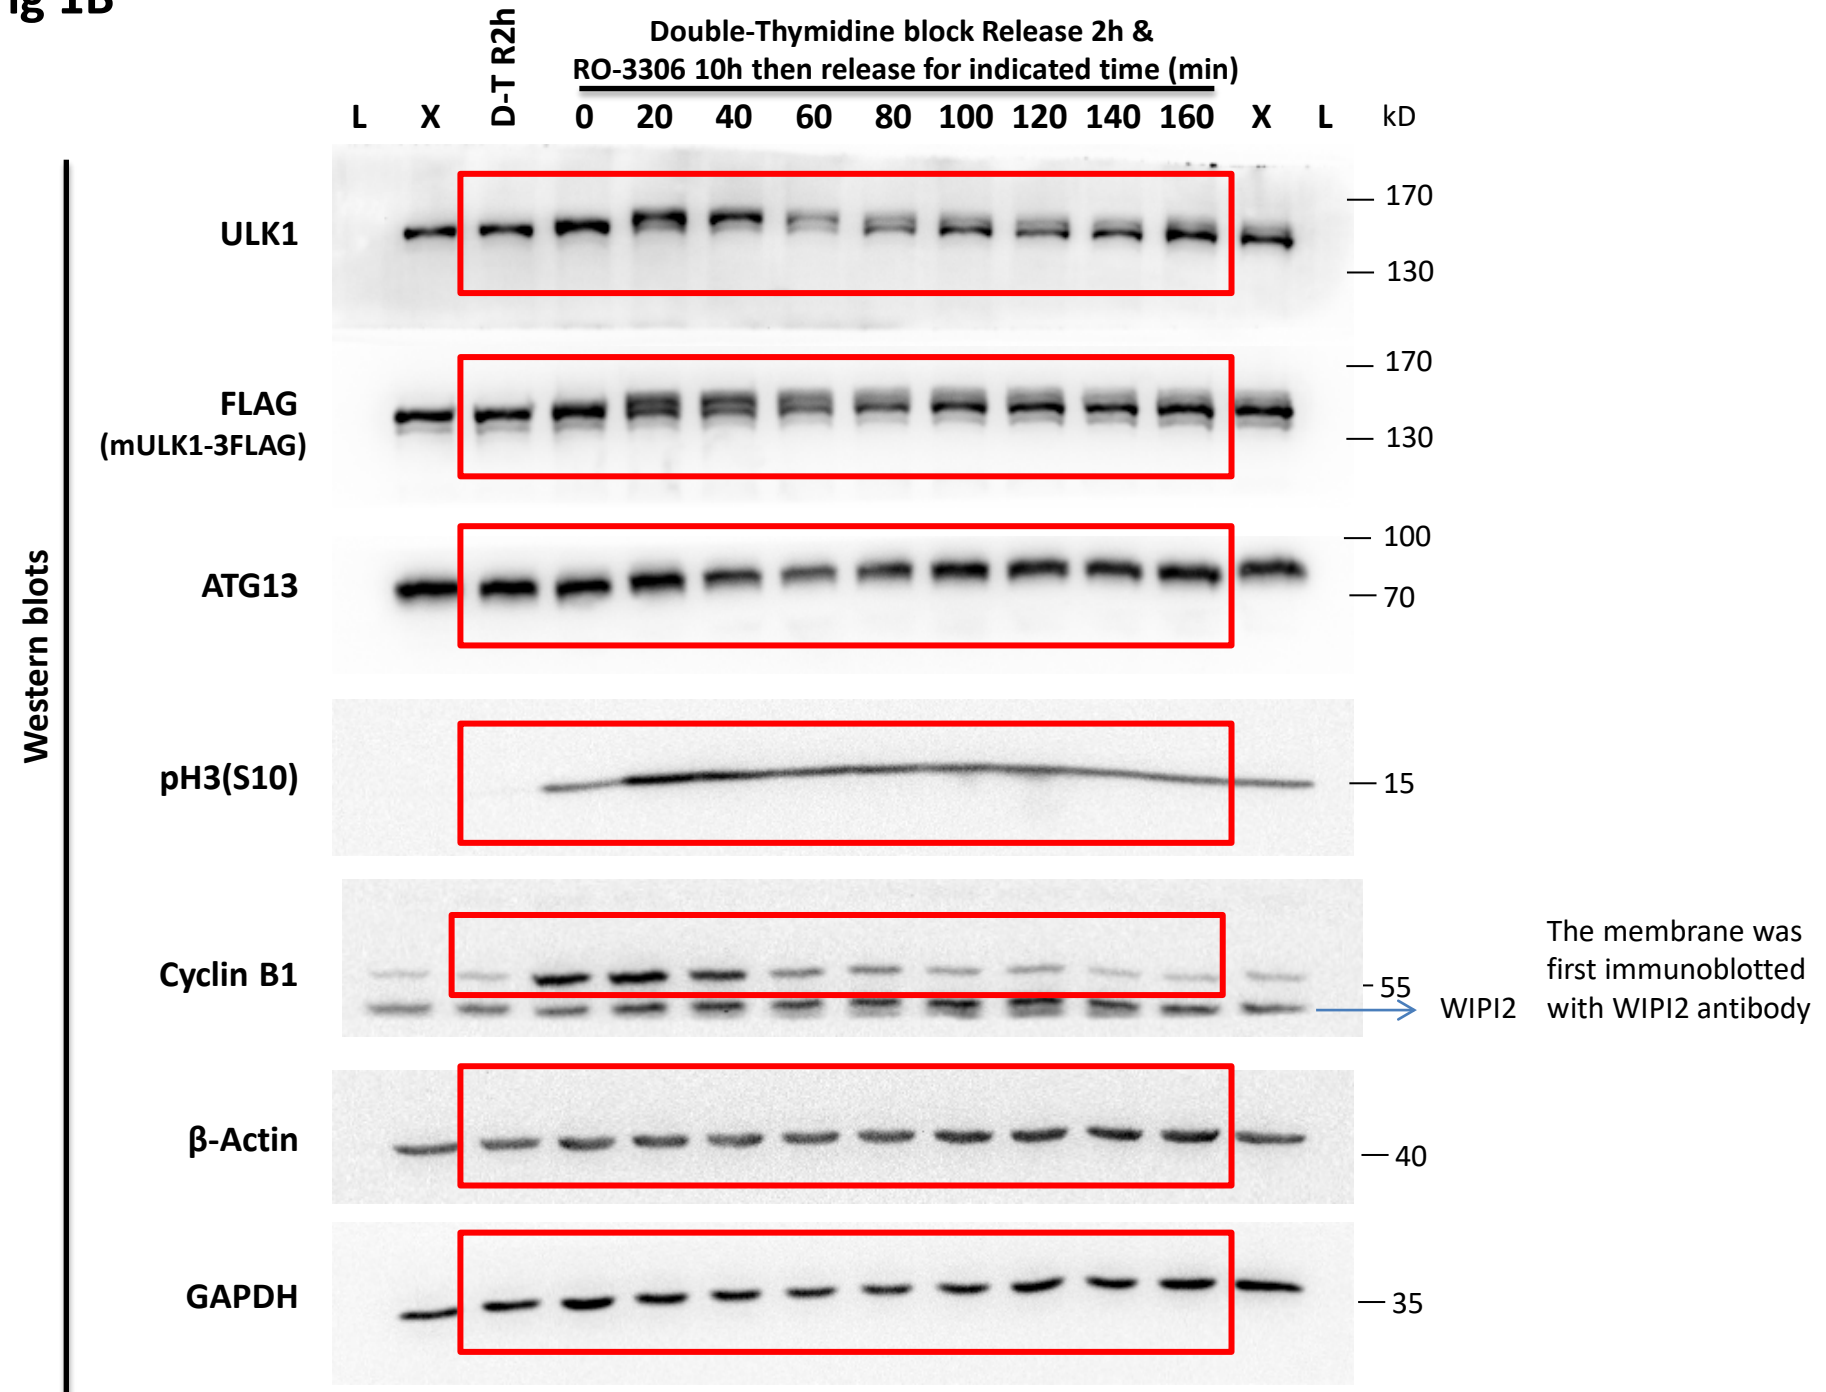

Images were acquired by chemiluminescence CCD camera-based digital imaging instruments (Tanon Fine-do X6). Approx. molecular weight ladder (L) was indicated. PVDF Membranes were cut for immunoblotting of more than one protein.

**Fig 1C**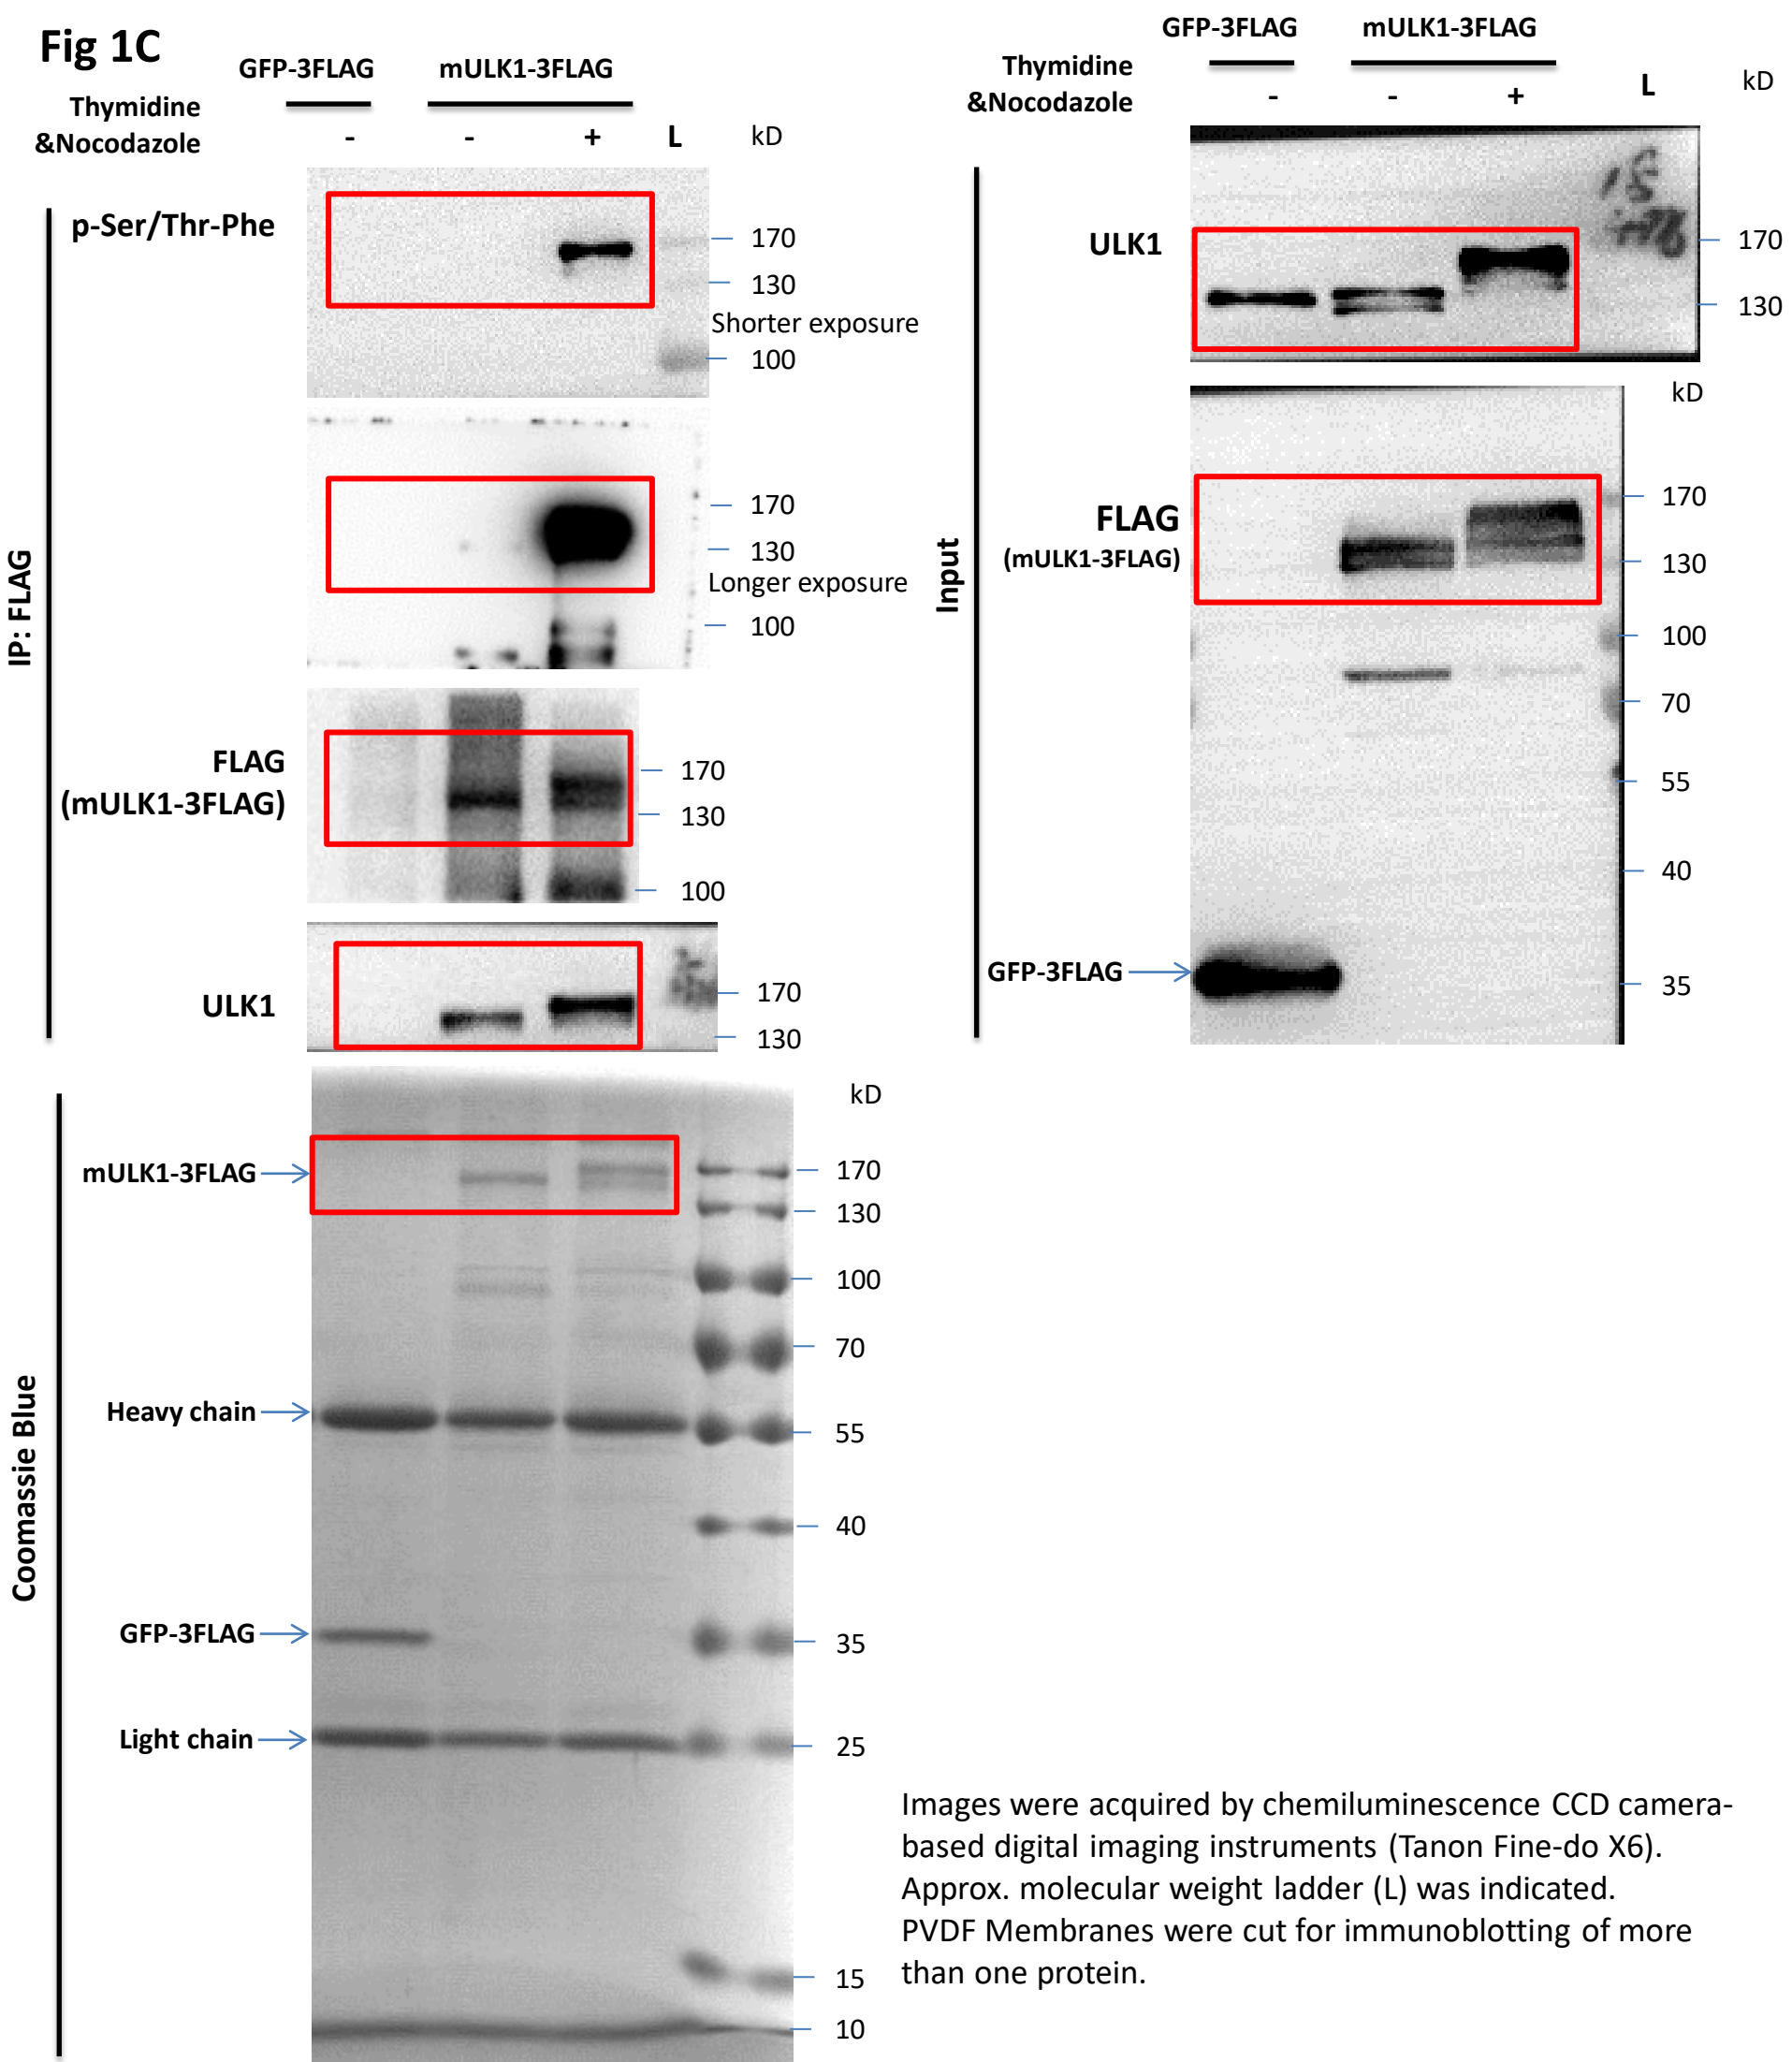

**Fig 1D**

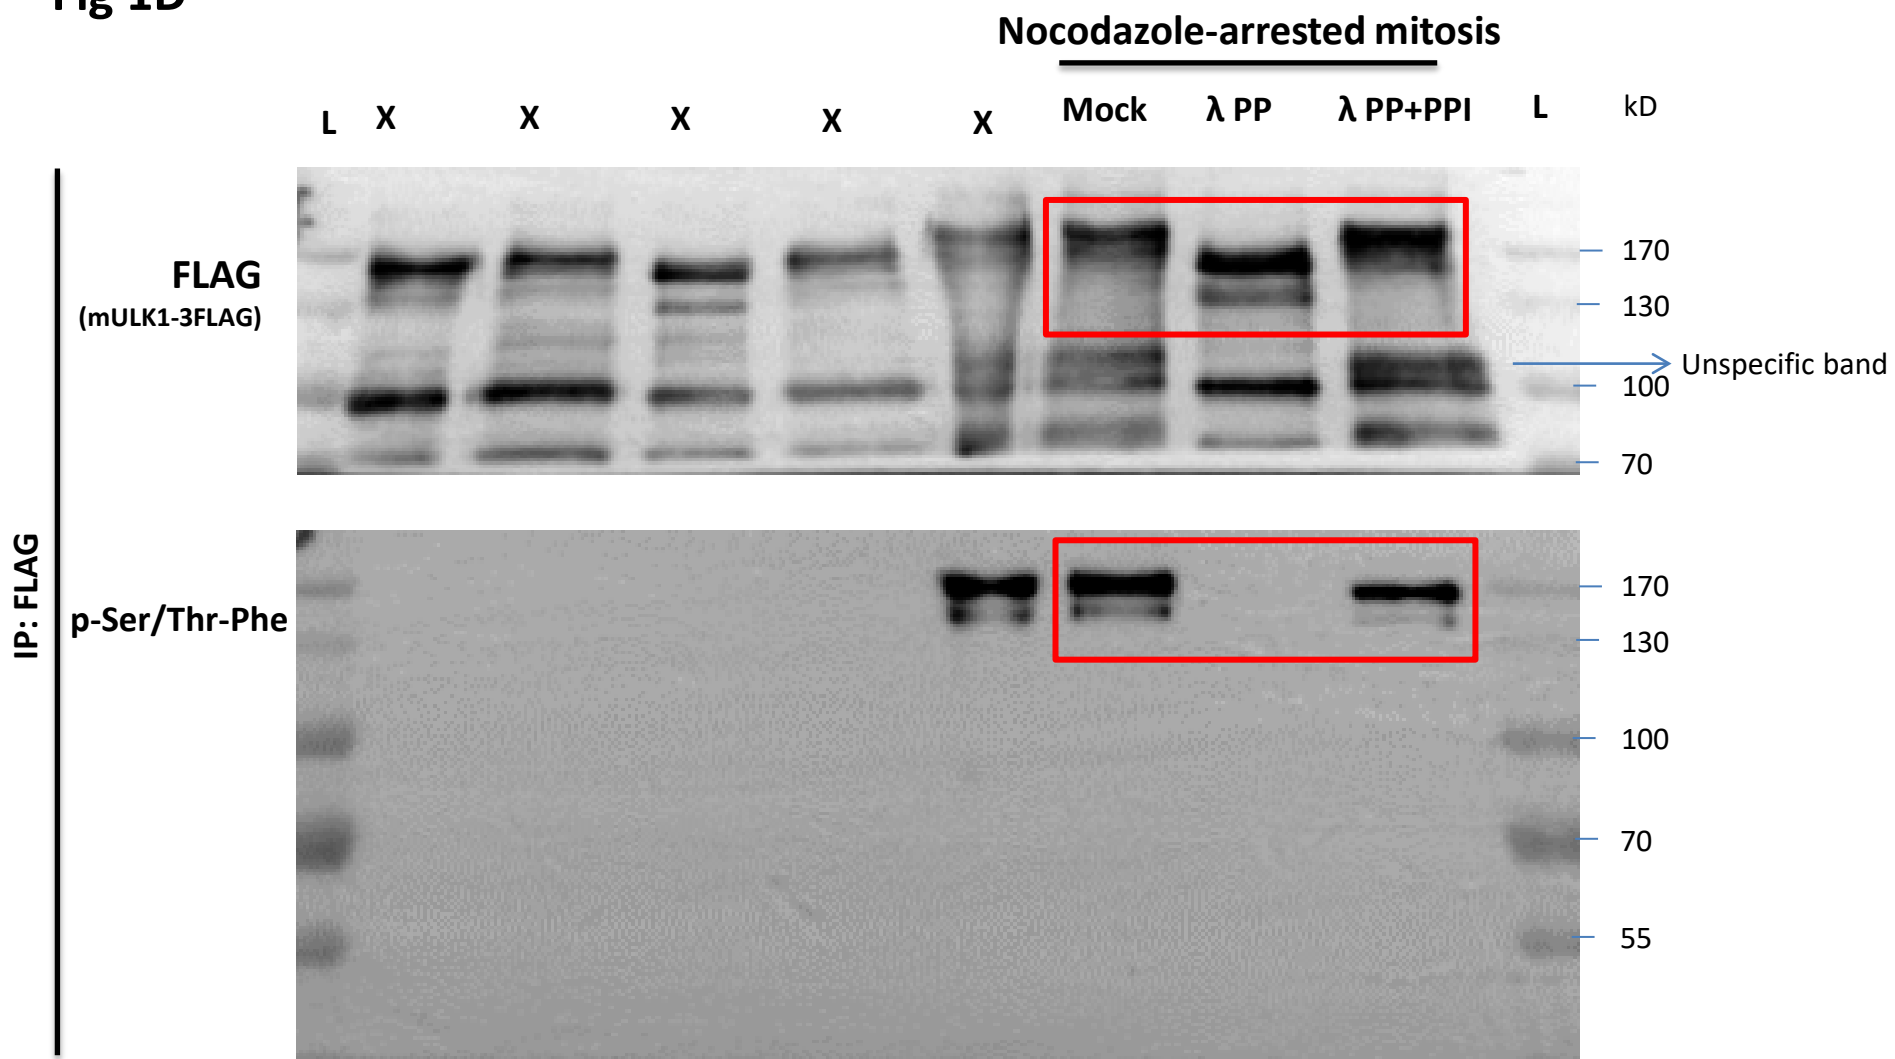

Images were acquired by chemiluminescence CCD camera-based digital imaging instruments (Tanon Fine-do X6).  
Approx. molecular weight ladder (L) was indicated.  
PVDF Membranes were cut for immunoblotting of more than one protein.

**Fig 1E**

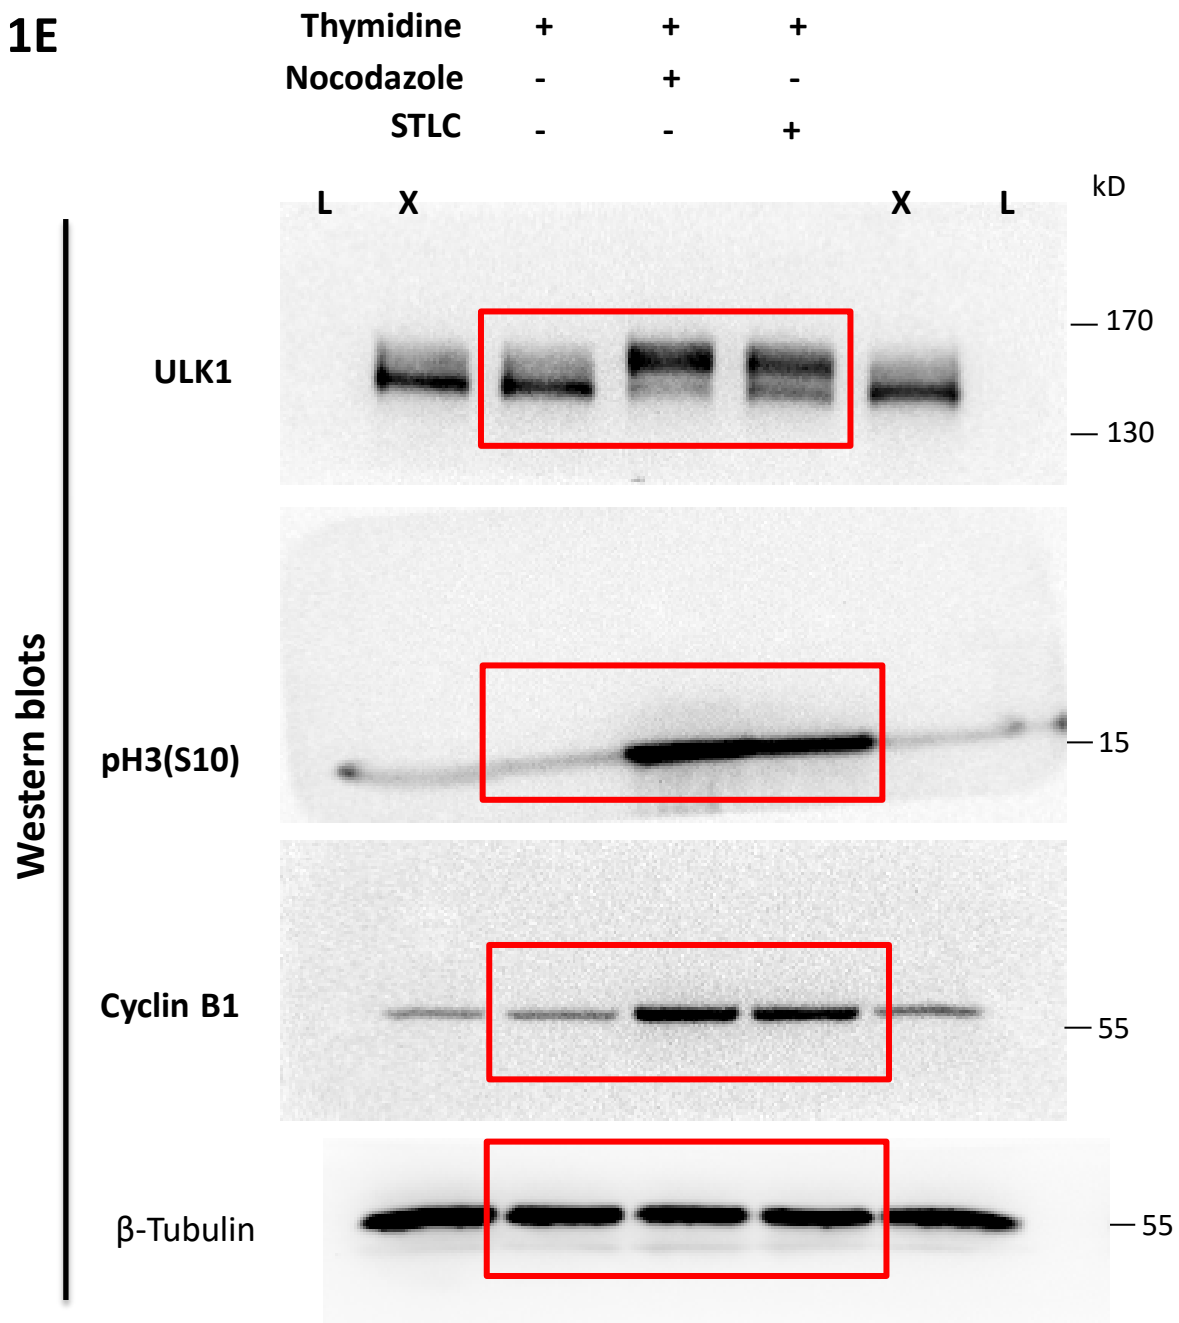

Images were acquired by chemiluminescence CCD camera-based digital imaging instruments (Tanon Fine-do X6).  
Approx. molecular weight ladder (L) was indicated.  
PVDF Membranes were cut for immunoblotting of more than one protein.

**Fig 1F**

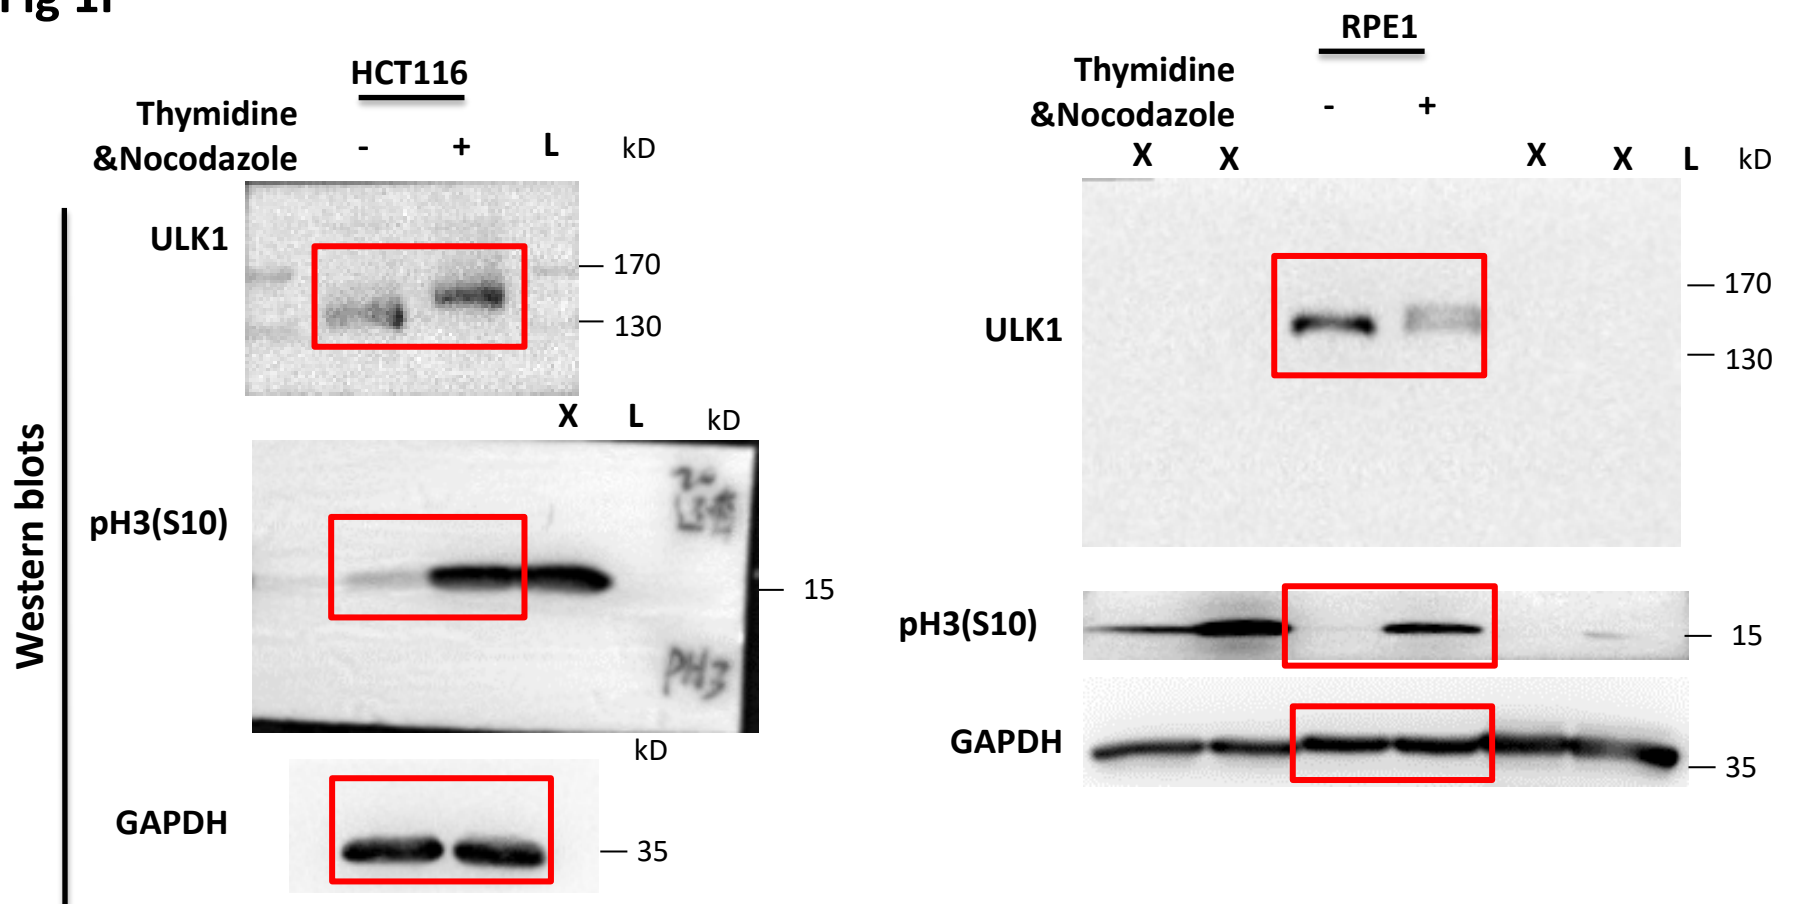

Images were acquired by chemiluminescence CCD camera-based digital imaging instruments (Tanon Fine-do X6). Approx. molecular weight ladder (L) was indicated. PVDF Membranes were cut for immunoblotting of more than one protein.

Fig 2A

Upper panel

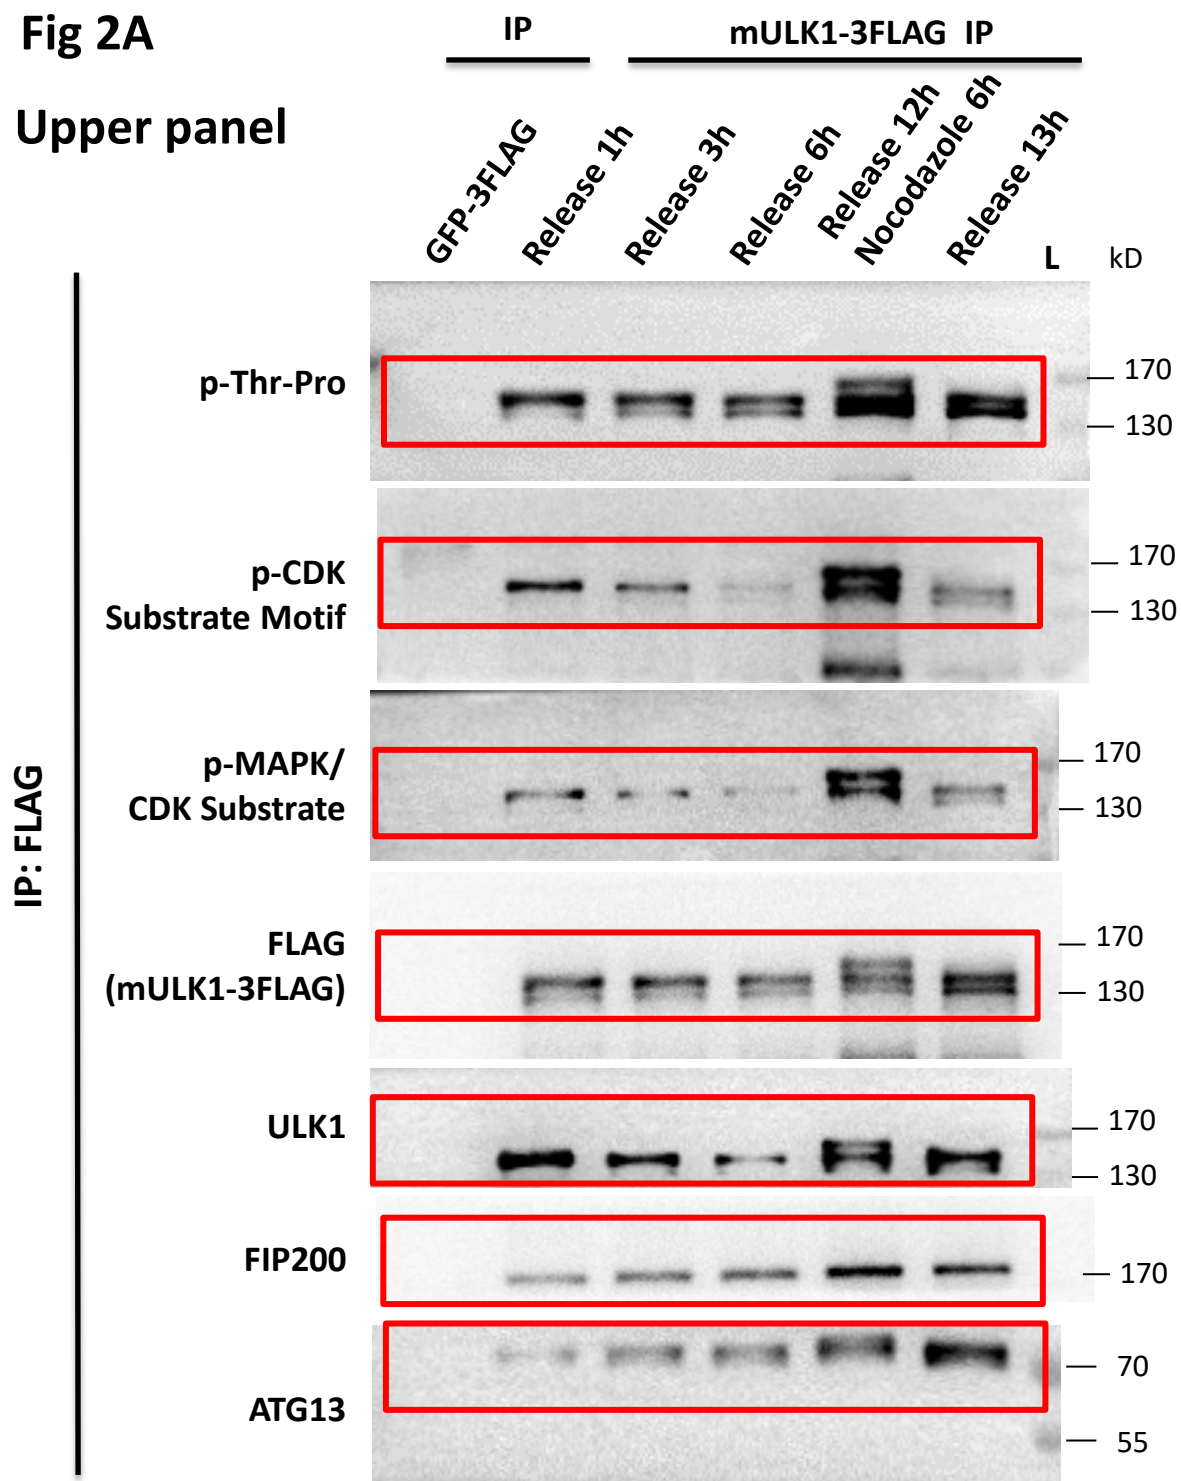

Images were acquired by chemiluminescence CCD camera-based digital imaging instruments (Tanon Fine-do X6).  
Approx. molecular weight ladder (L) was indicated.  
PVDF Membranes were cut for immunoblotting of more than one protein.



Fig 2A

Lower panel

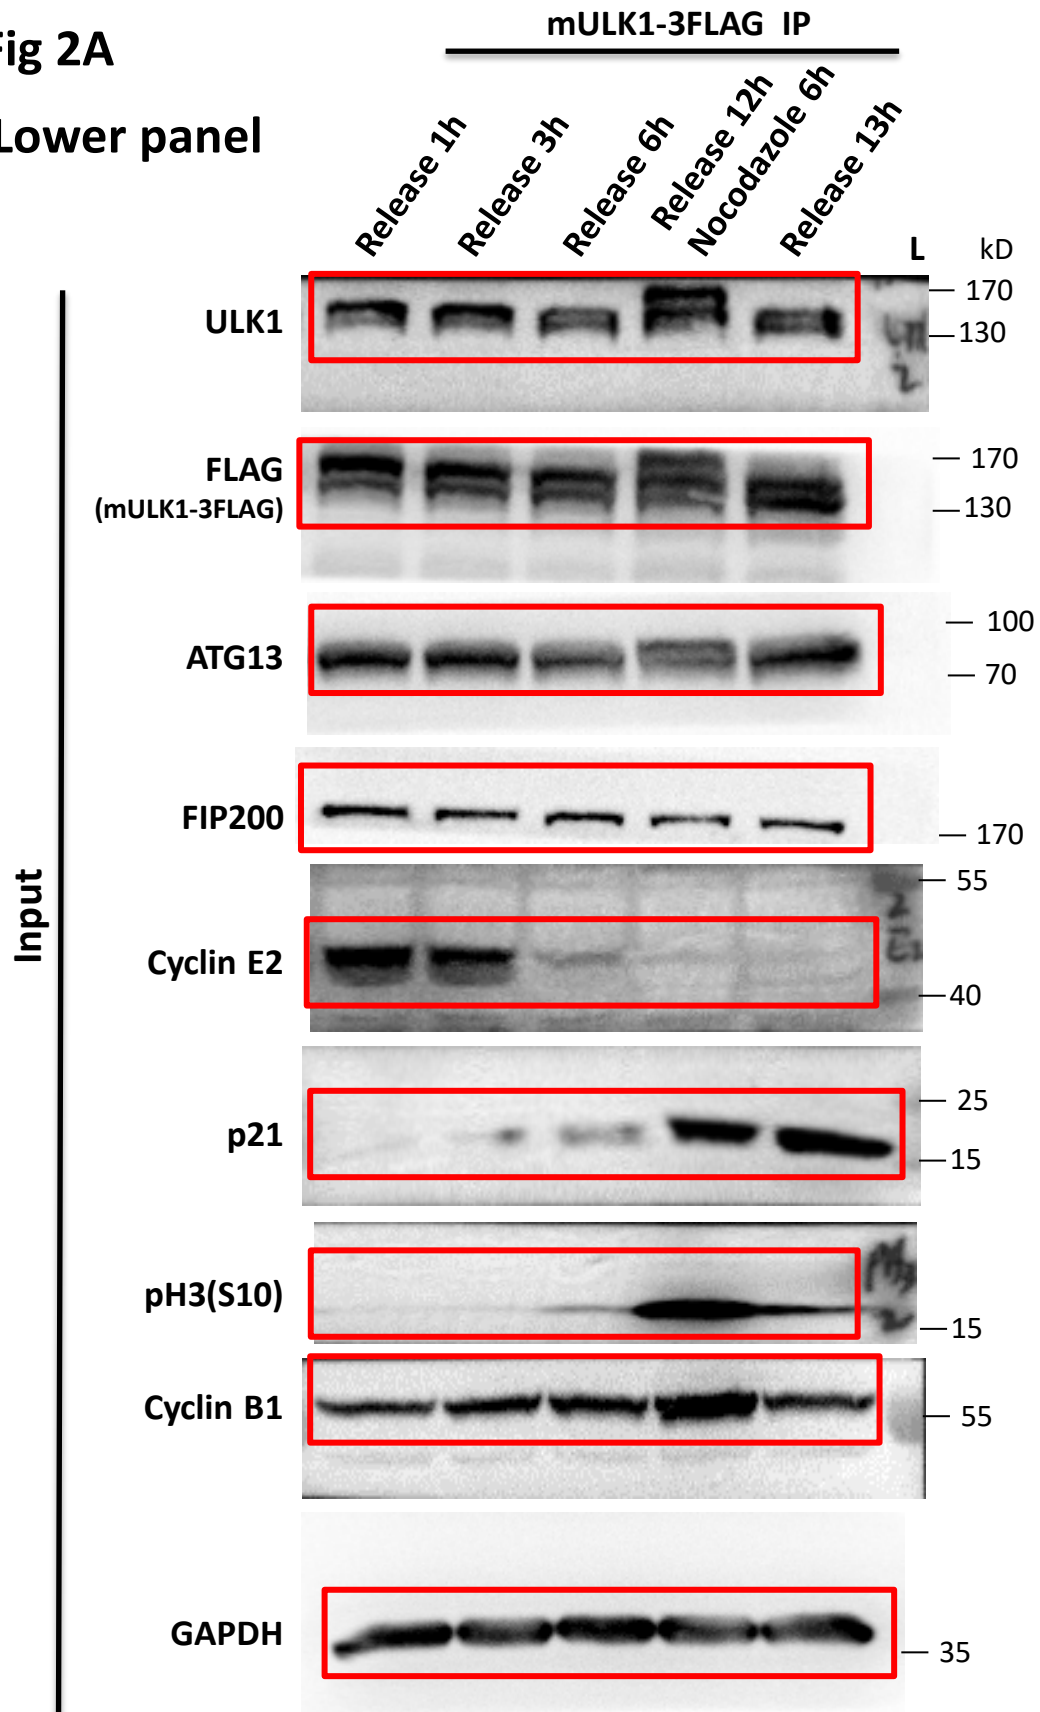

Images were acquired by chemiluminescence CCD camera-based digital imaging instruments (Tanon Fine-do X6). Approx. molecular weight ladder (L) was indicated. PVDF Membranes were cut for immunoblotting of more than one protein.

**Fig 2B**

**Upper panel**

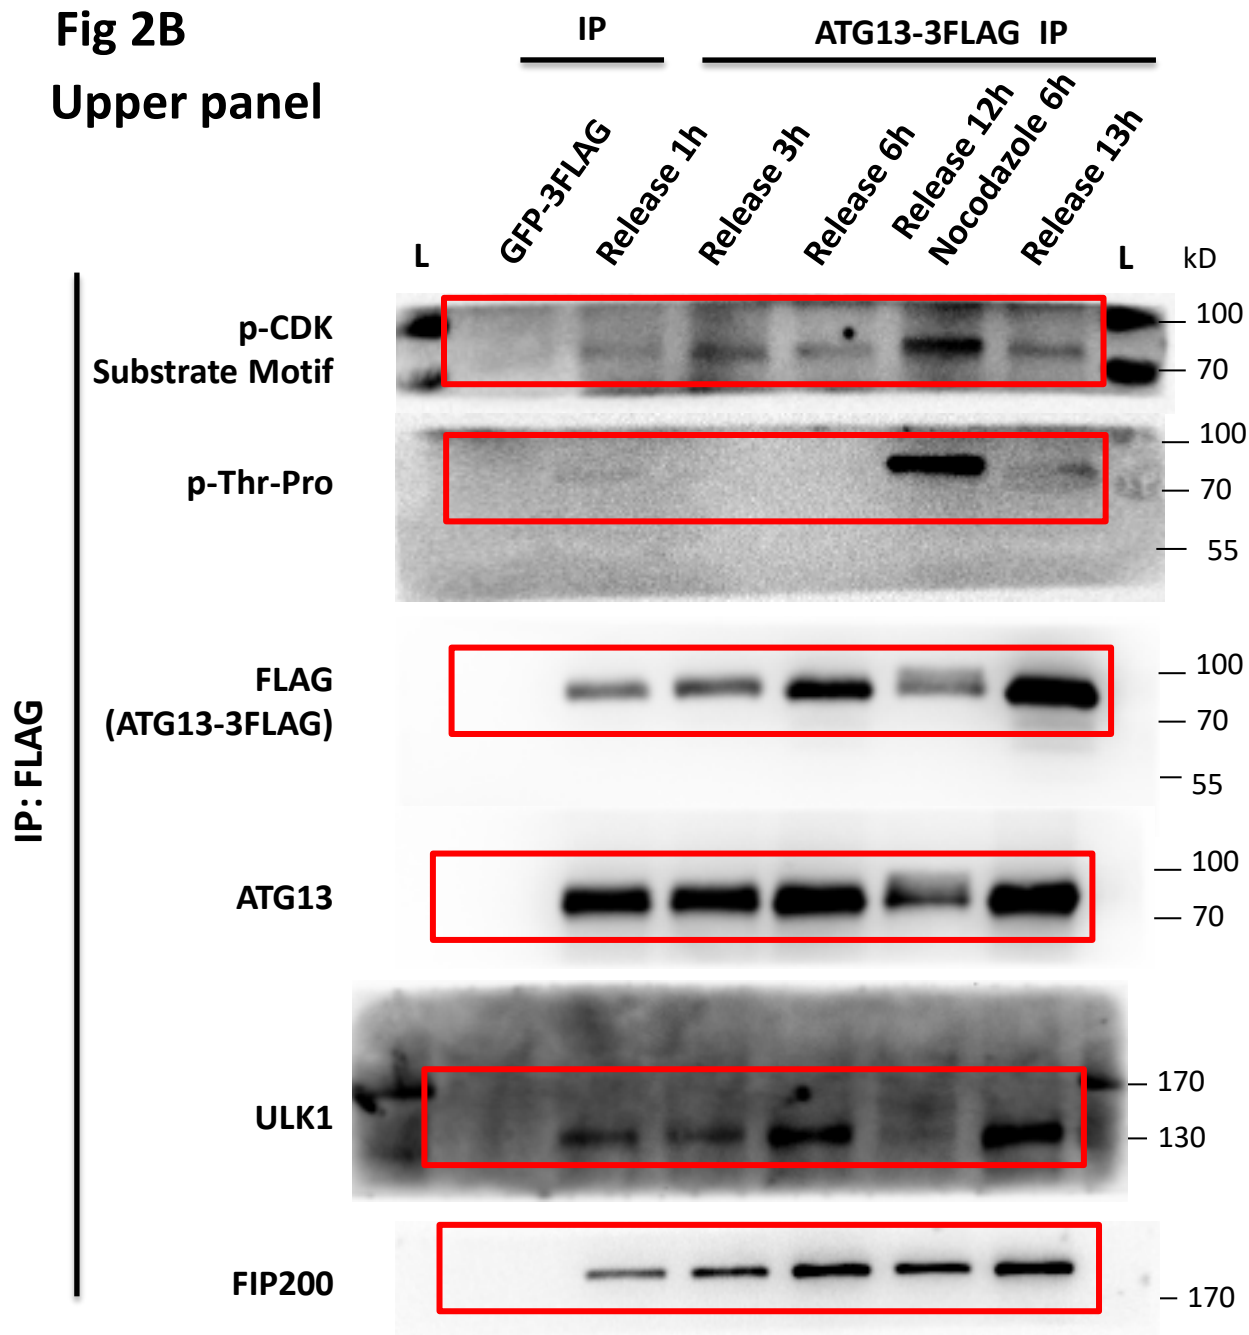

Images were acquired by chemiluminescence CCD camera-based digital imaging instruments (Tanon Fine-do X6). Approx. molecular weight ladder (L) was indicated. PVDF Membranes were cut for immunoblotting of more than one protein.

Fig 2B

Lower panel

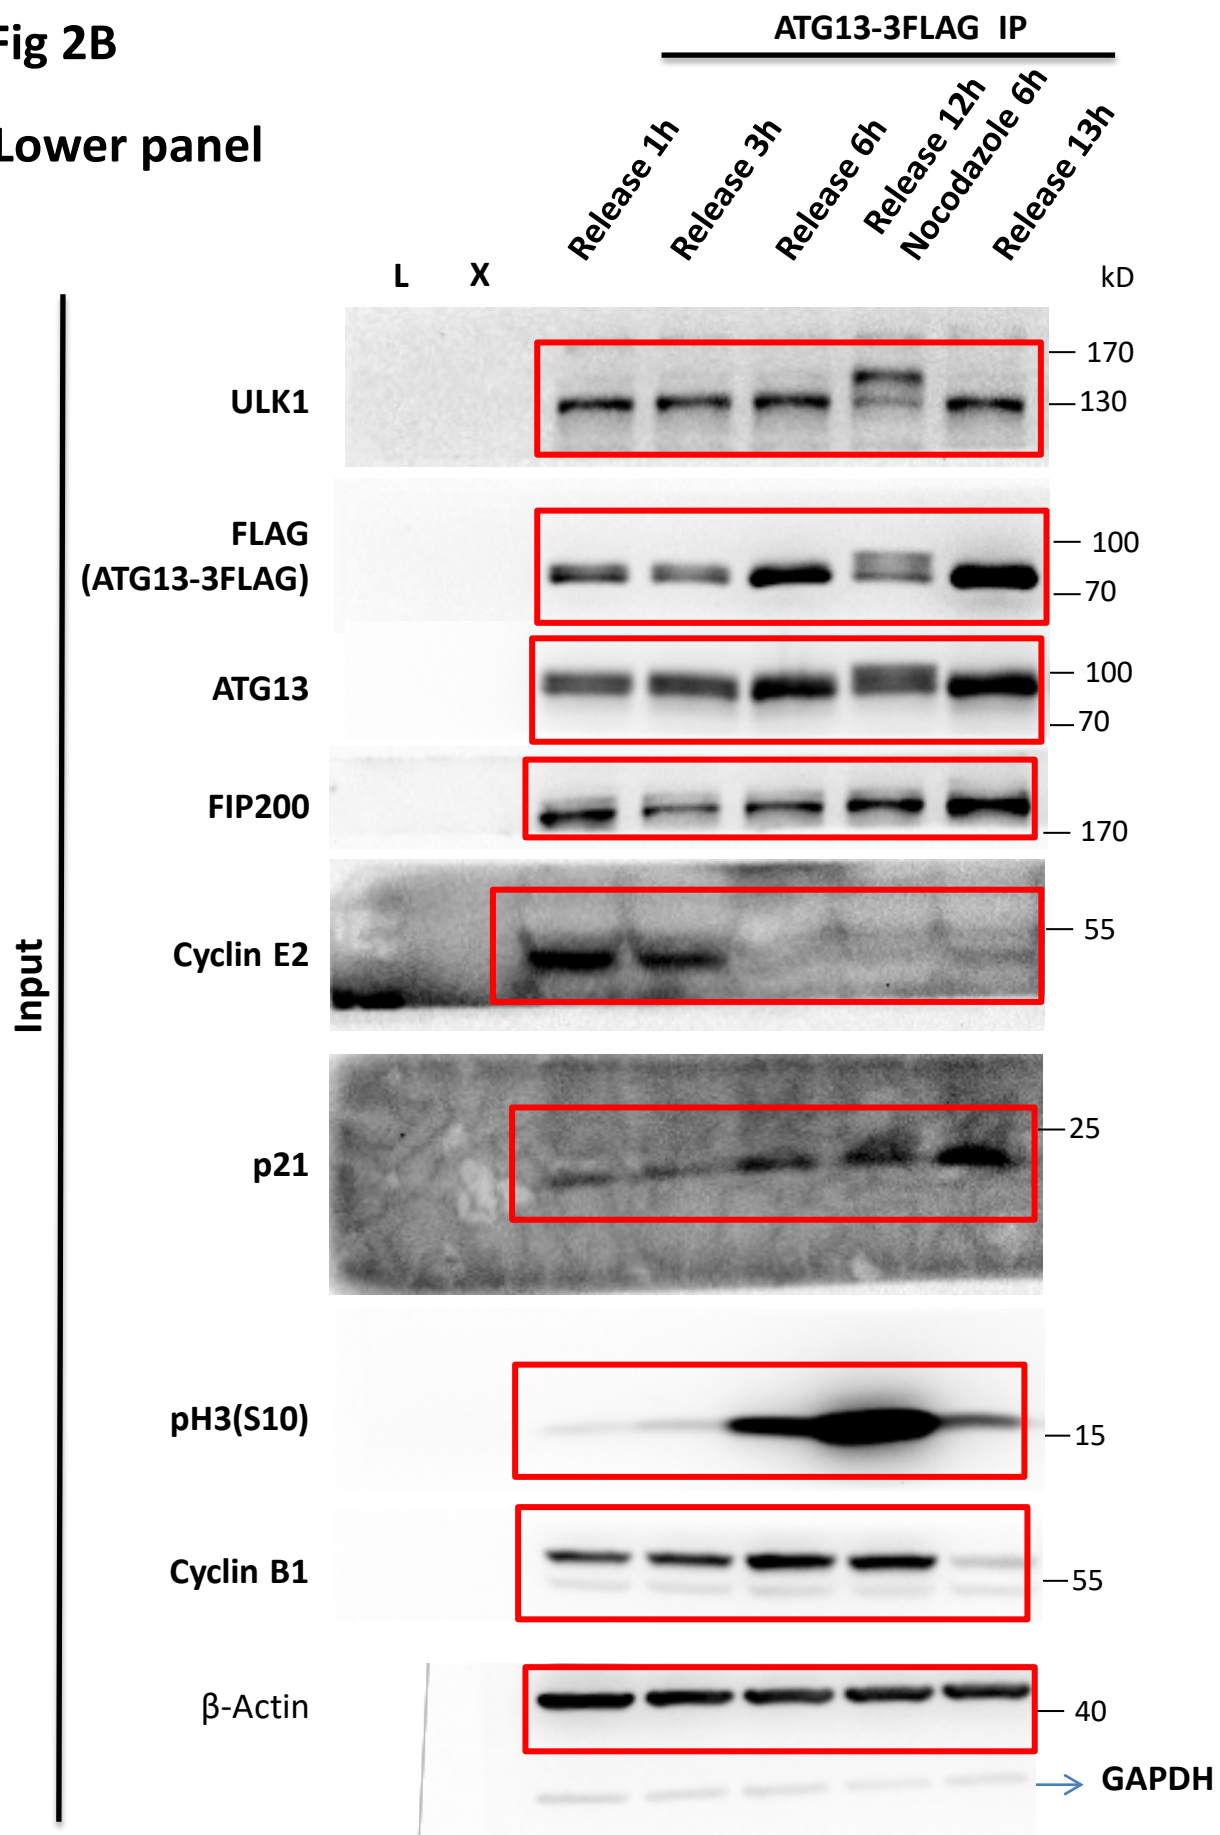

Images were acquired by chemiluminescence CCD camera-based digital imaging instruments (Tanon Fine-do X6). Approx. molecular weight ladder (L) was indicated. PVDF Membranes were cut for immunoblotting of more than one protein.

**Fig 3B****Upper panel**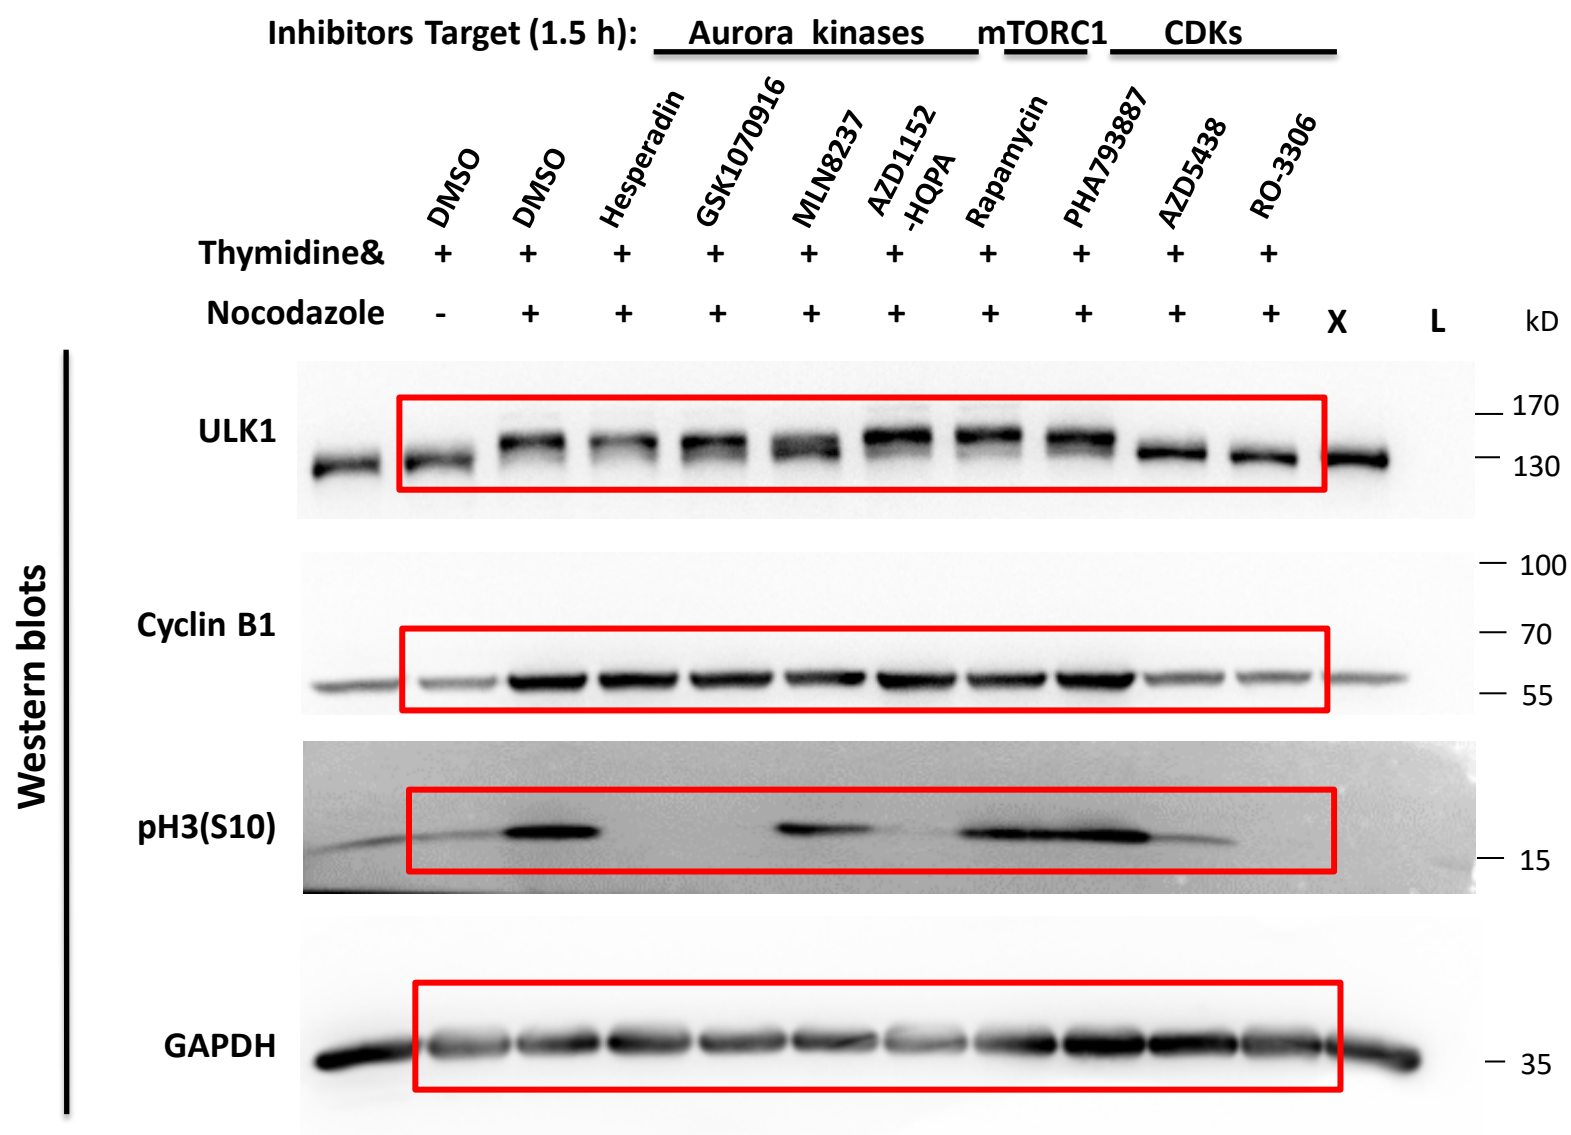

Images were acquired by chemiluminescence CCD camera-based digital imaging instruments (Tanon Fine-do X6). Approx. molecular weight ladder (L) was indicated. PVDF Membranes were cut for immunoblotting of more than one protein.

**Fig 3B**

**Lower panel**

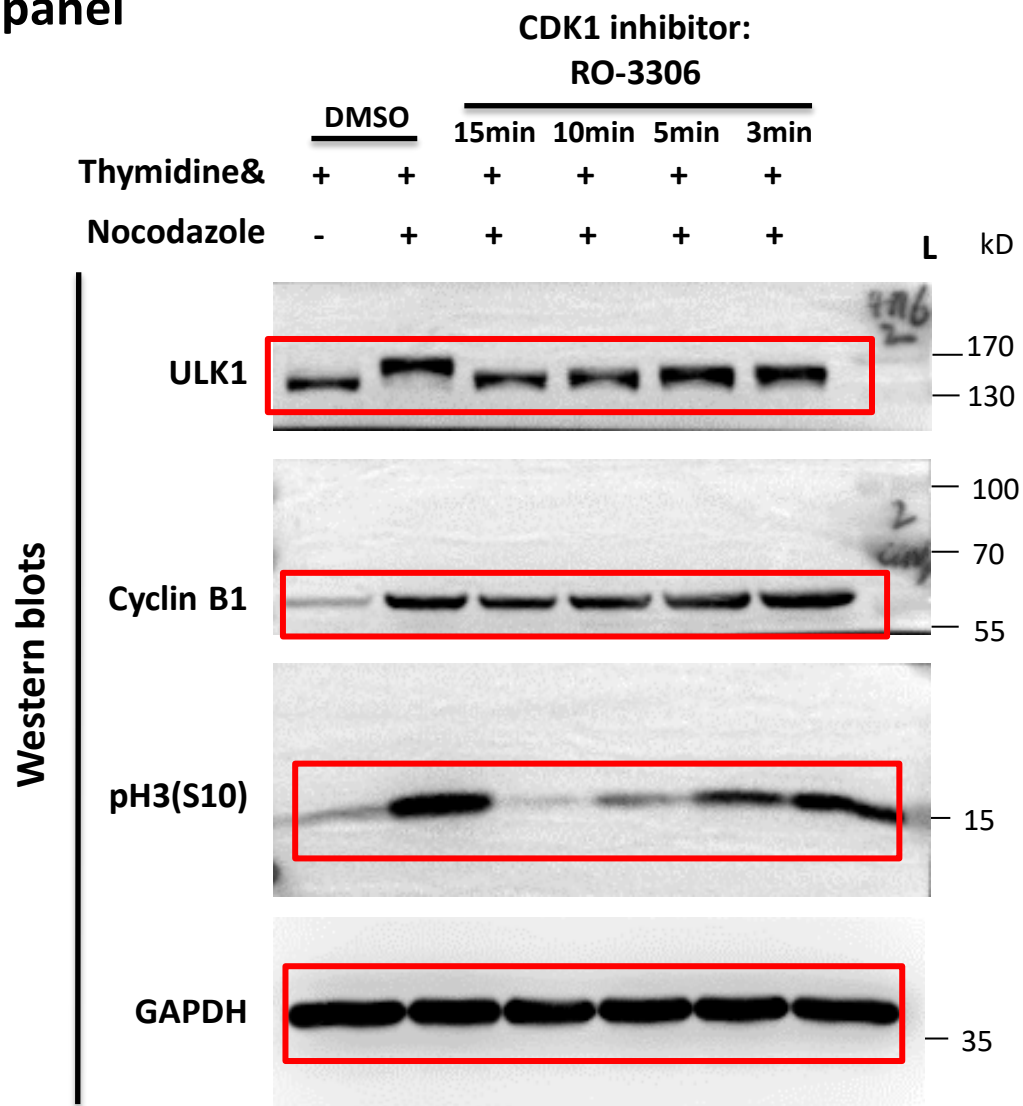

Images were acquired by chemiluminescence CCD camera-based digital imaging instruments (Tanon Fine-do X6).  
Approx. molecular weight ladder (L) was indicated.  
PVDF Membranes were cut for immunoblotting of more than one protein.

**Fig 3C**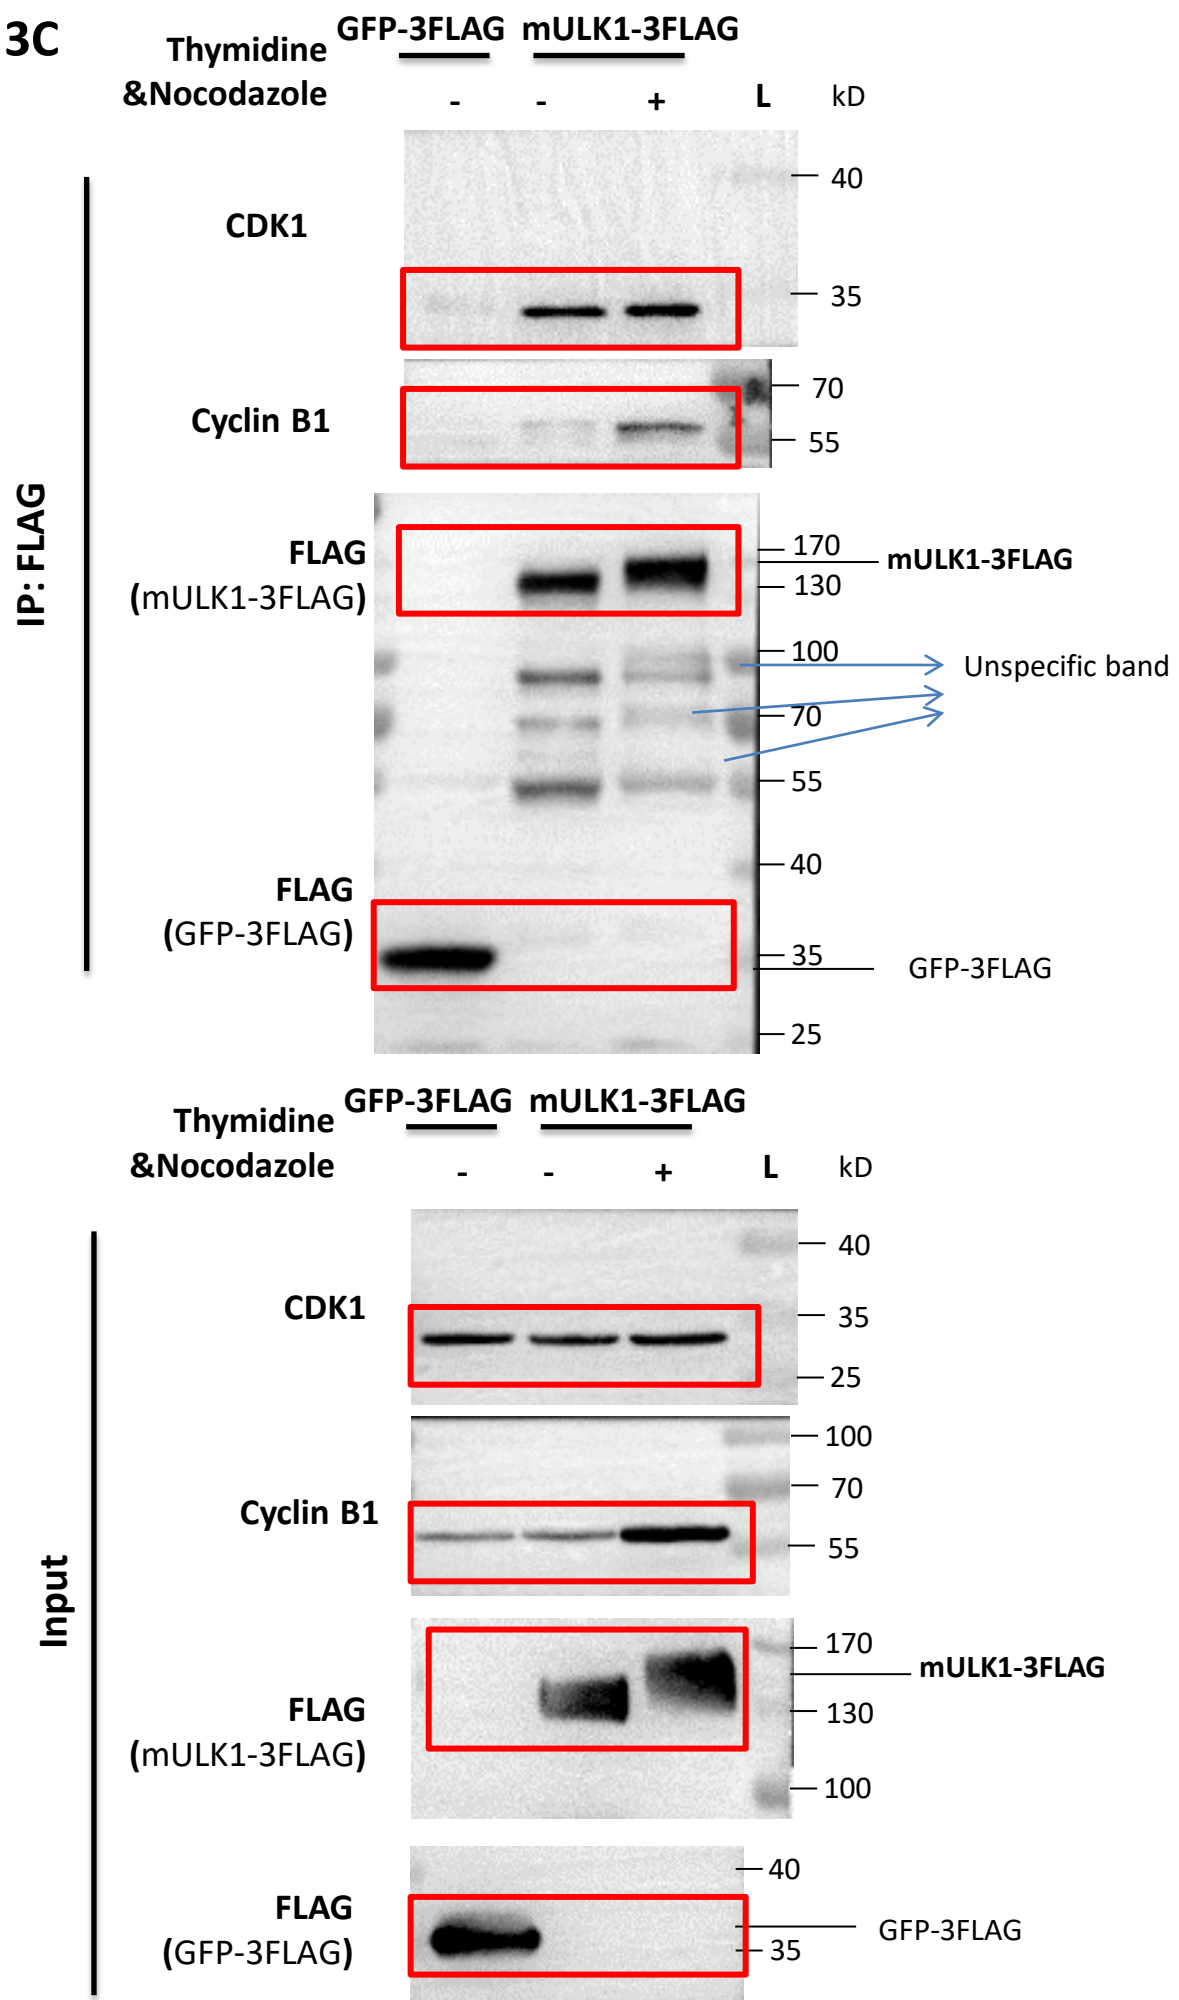

Images were acquired by chemiluminescence CCD camera-based digital imaging instruments (Tanon Fine-do X6). Approx. molecular weight ladder (L) was indicated. PVDF Membranes were cut for immunoblotting of more than one protein.

**Fig 3D**

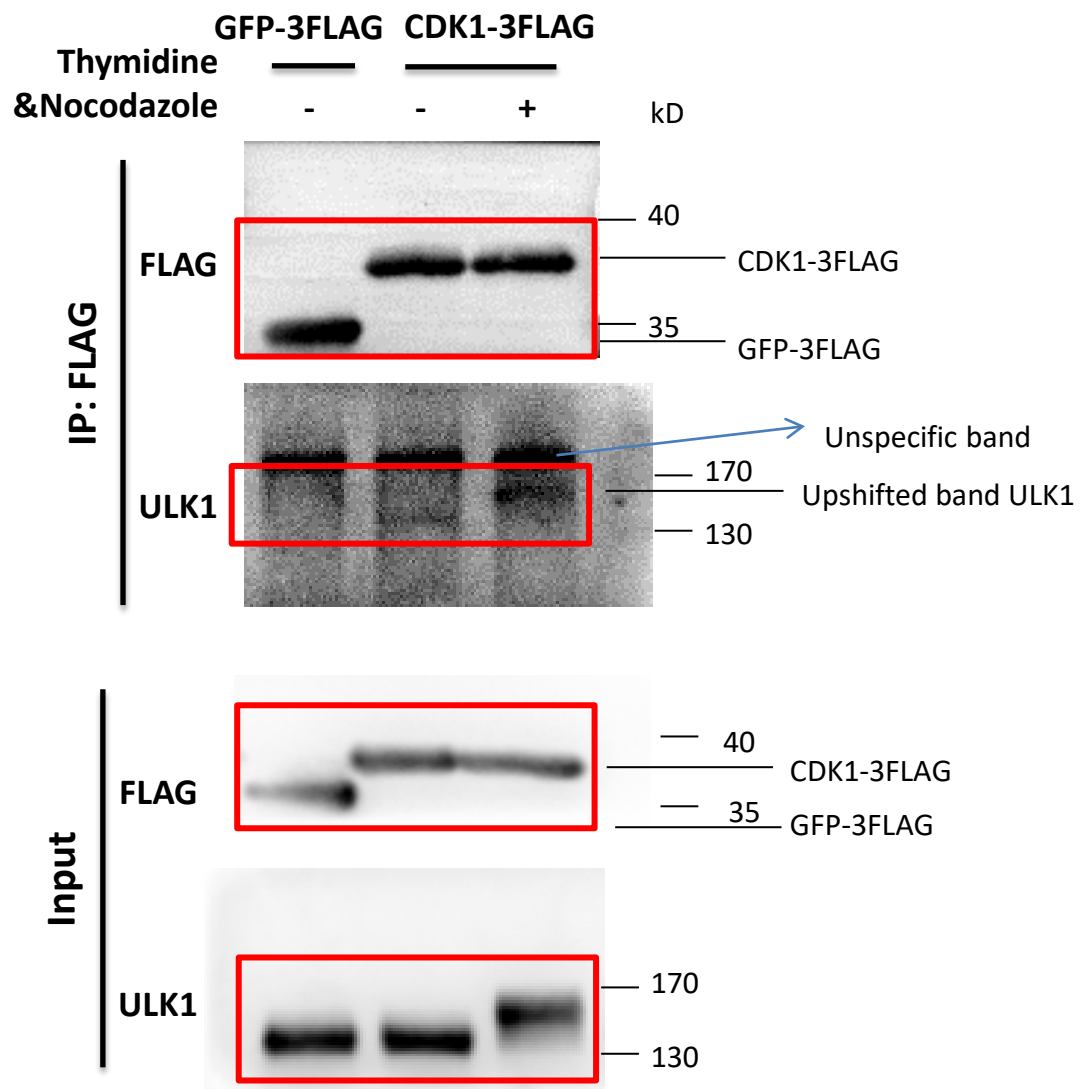

Images were acquired by chemiluminescence CCD camera-based digital imaging instruments (Tanon Fine-do X6). Approx. molecular weight ladder (L) was indicated. PVDF Membranes were cut for immunoblotting of more than one protein.

**Fig 3E**

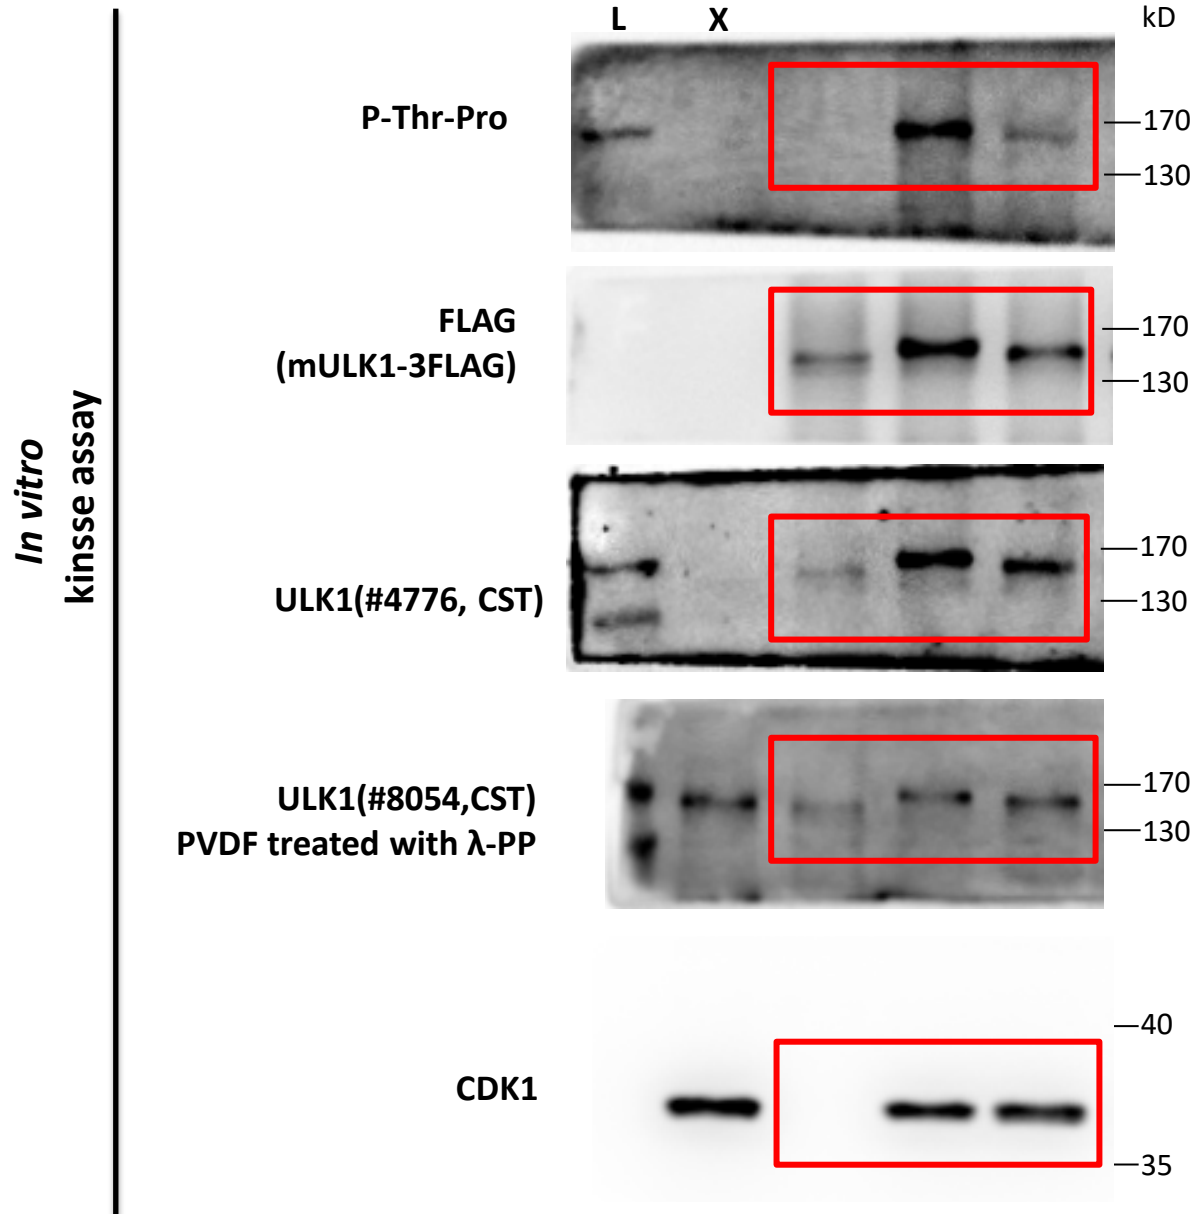

Images were acquired by chemiluminescence CCD camera-based digital imaging instruments (Tanon Fine-do X6).  
Approx. molecular weight ladder (L) was indicated.  
PVDF Membranes were cut for immunoblotting of more than one protein.



**Fig 4A**

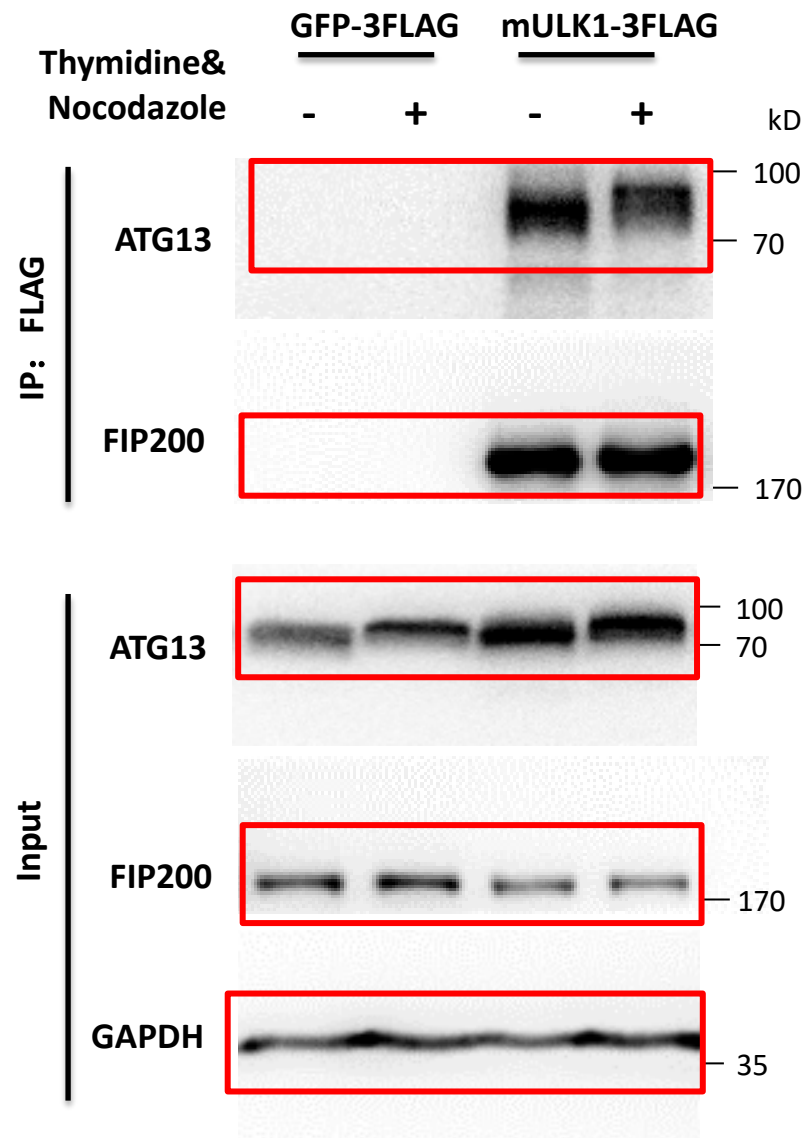

Images were acquired by chemiluminescence CCD camera-based digital imaging instruments (Tanon Fine-do X6). Approx. molecular weight ladder (L) was indicated. PVDF Membranes were cut for immunoblotting of more than one protein.

**Fig 4B**

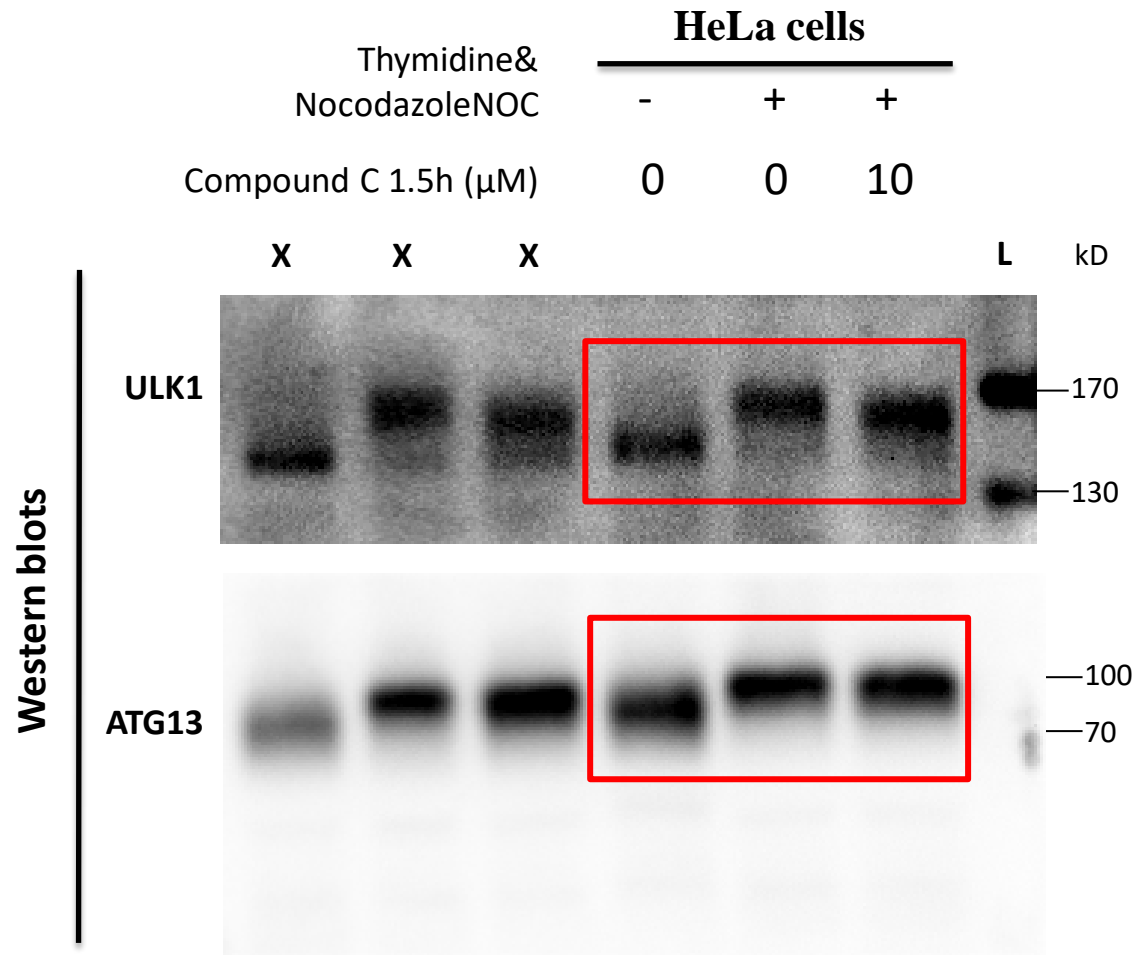

Images were acquired by chemiluminescence CCD camera-based digital imaging instruments (Tanon Fine-do X6). Approx. molecular weight ladder (L) was indicated. PVDF Membranes were cut for immunoblotting of more than one protein.

**Fig 4B**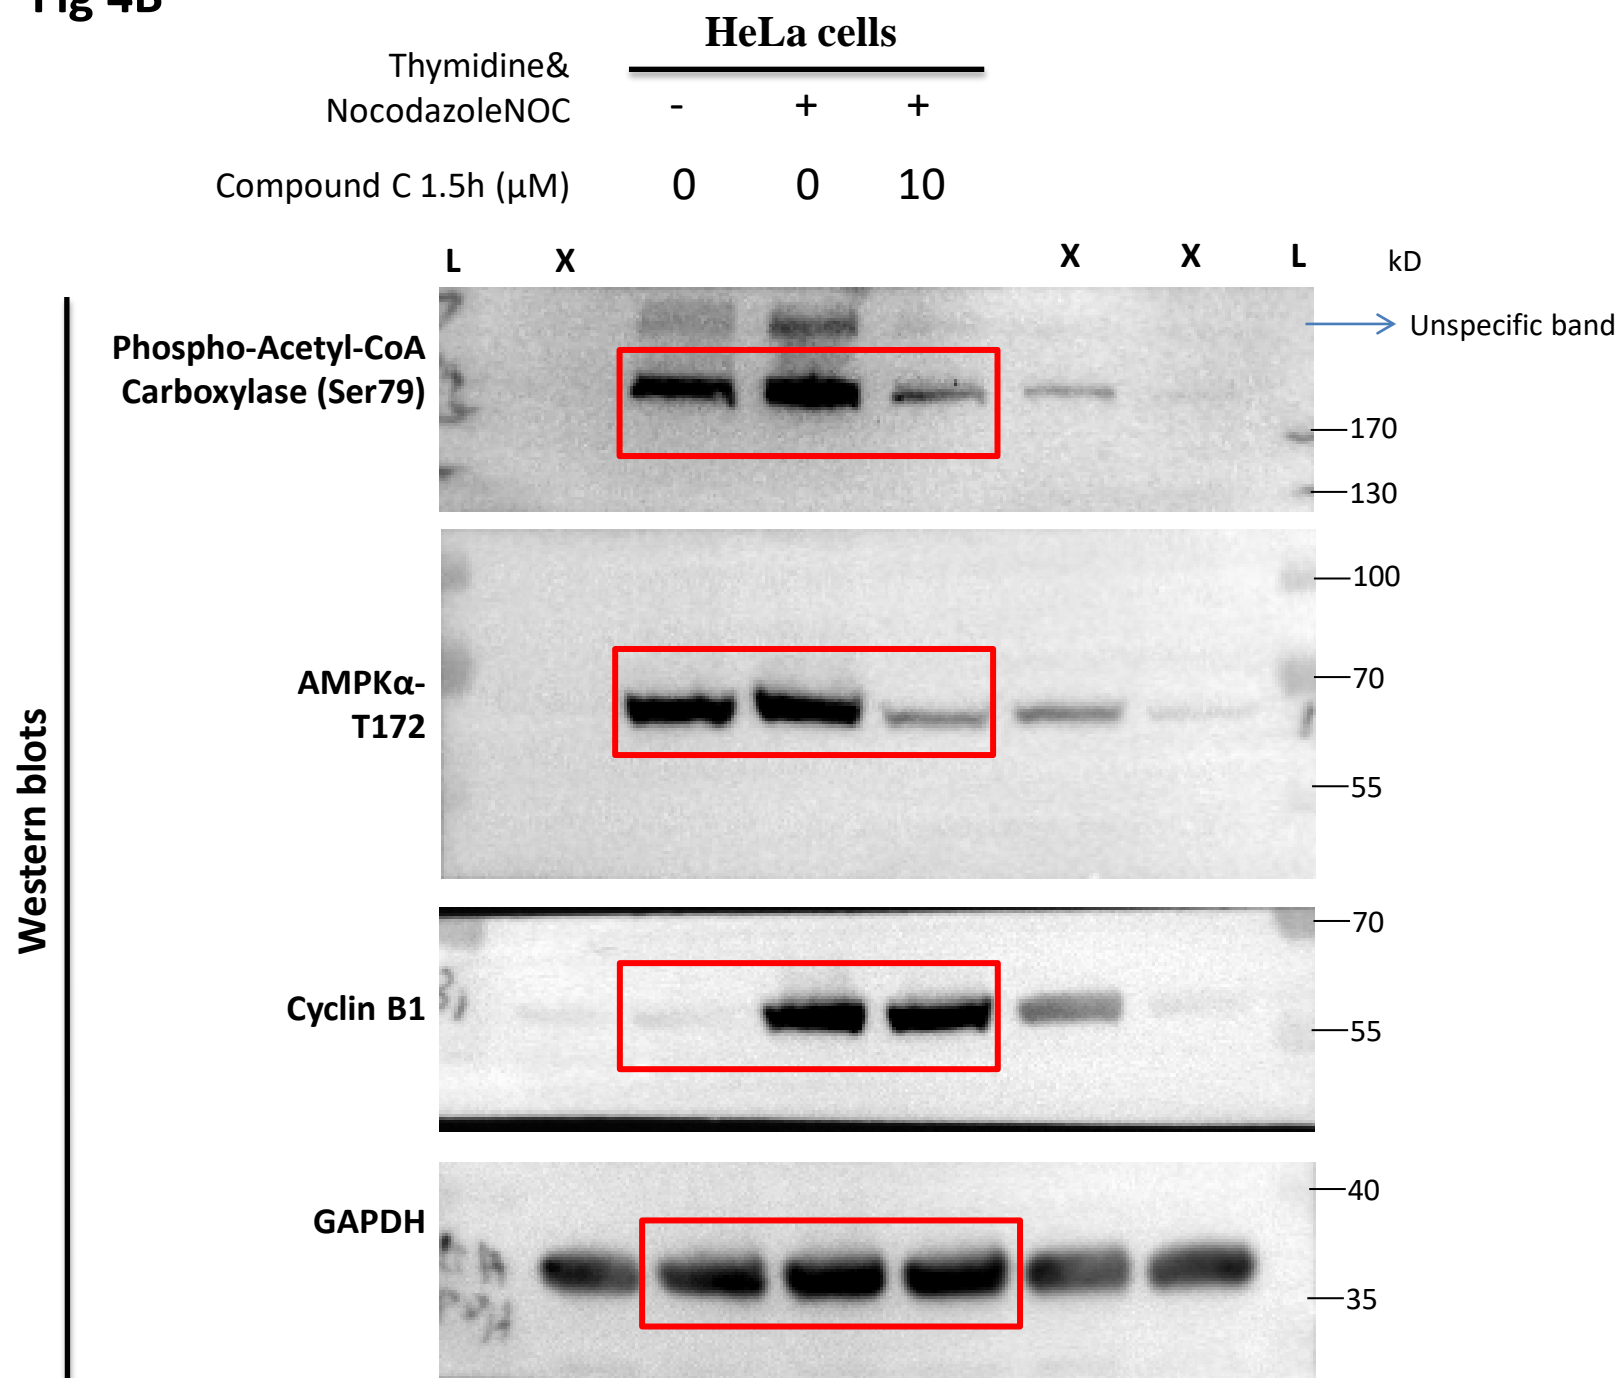

Images were acquired by chemiluminescence CCD camera-based digital imaging instruments (Tanon Fine-do X6). Approx. molecular weight ladder (L) was indicated. PVDF Membranes were cut for immunoblotting of more than one protein.

**Fig 4C**

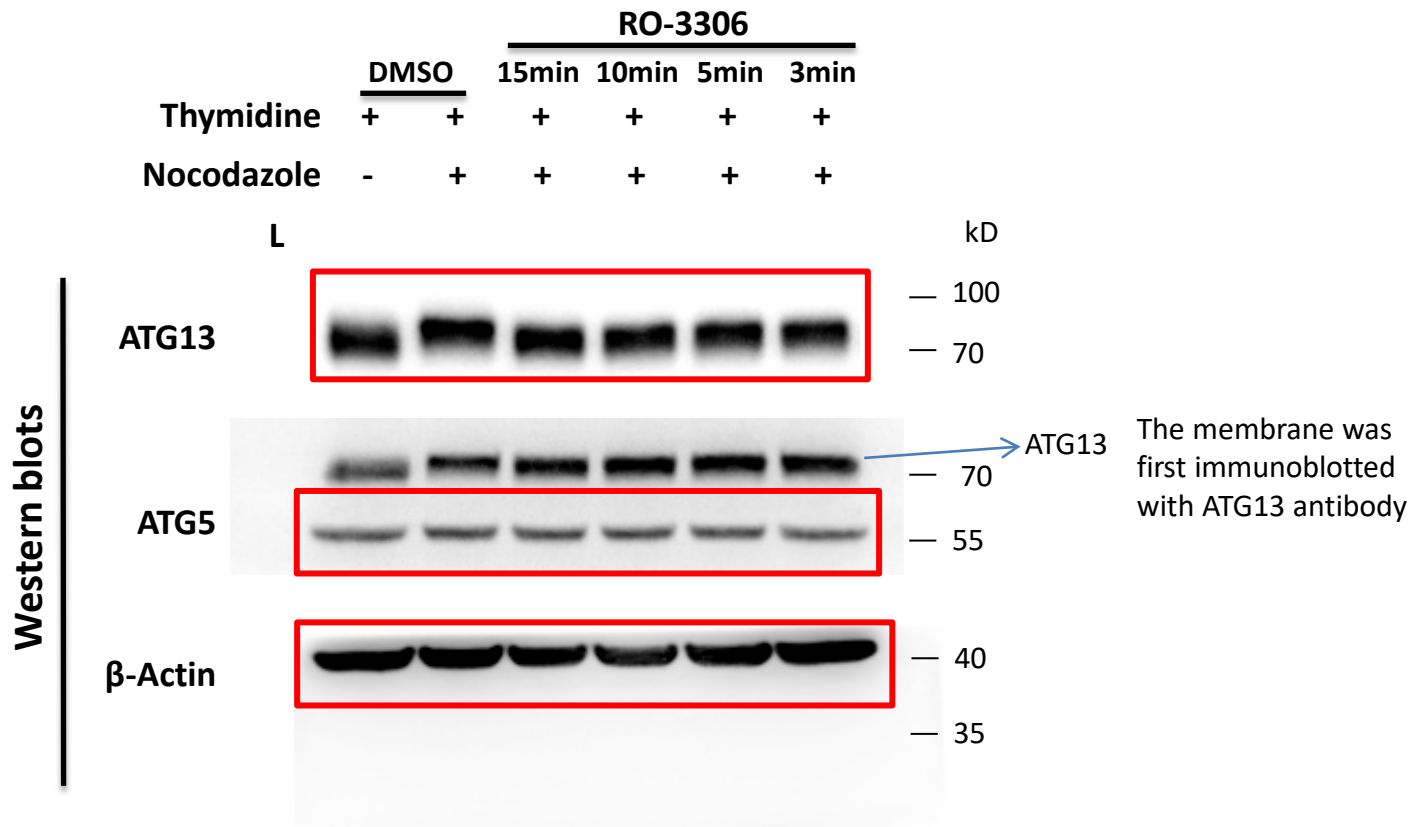

Images were acquired by chemiluminescence CCD camera-based digital imaging instruments (Tanon Fine-do X6).  
Approx. molecular weight ladder (L) was indicated.  
PVDF Membranes were cut for immunoblotting of more than one protein.

**Fig 4D**

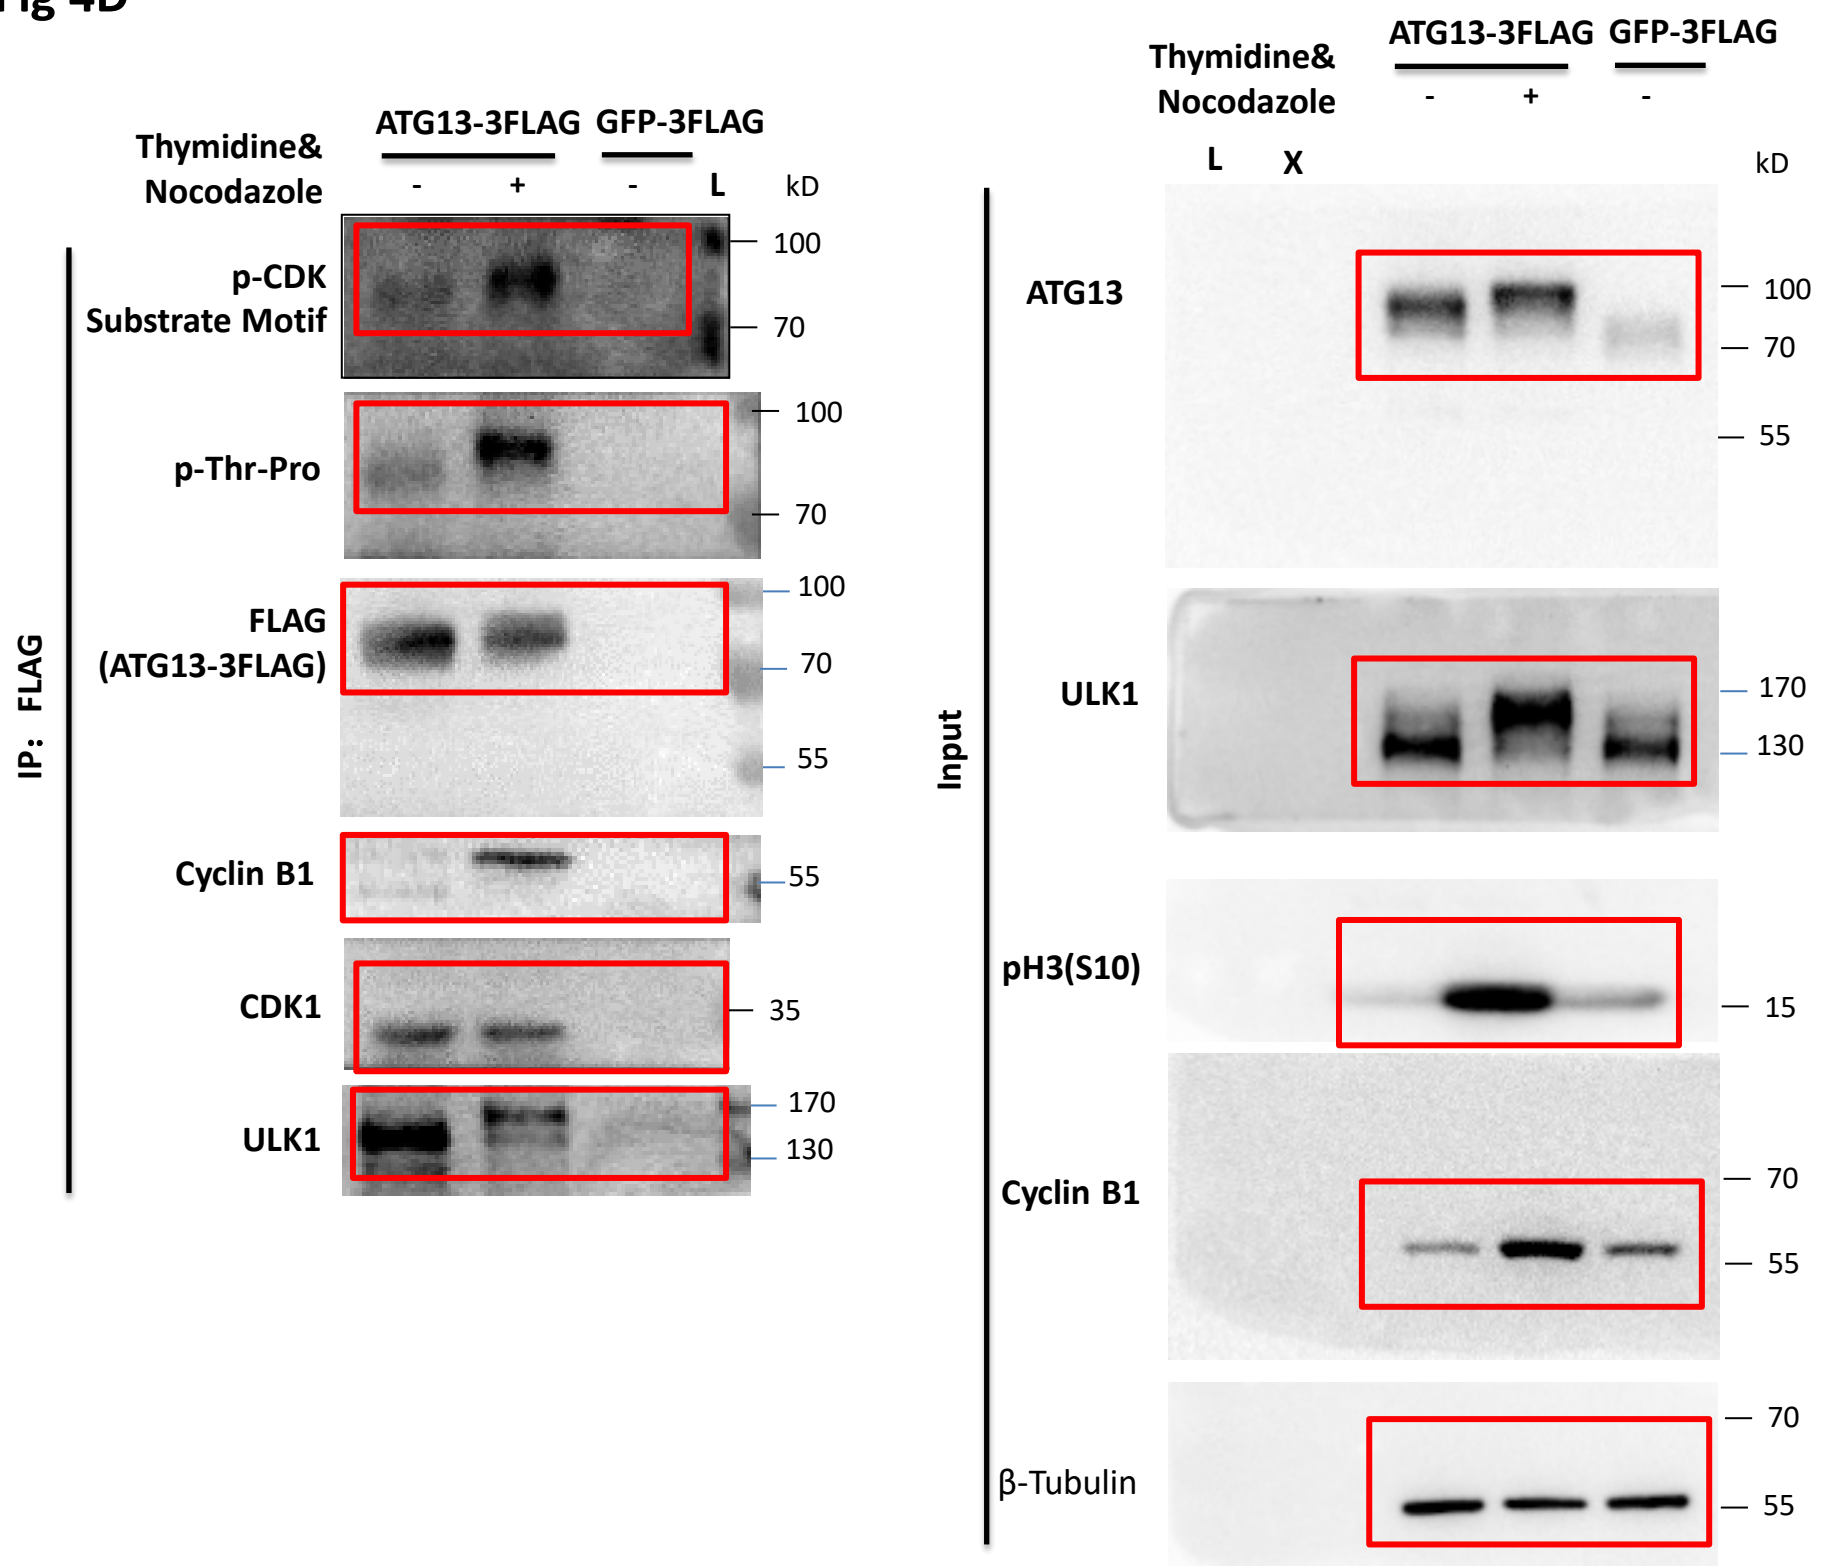

Images were acquired by chemiluminescence CCD camera-based digital imaging instruments (Tanon Fine-do X6). Approx. molecular weight ladder (L) was indicated. PVDF Membranes were cut for immunoblotting of more than one protein.

**Fig 4E**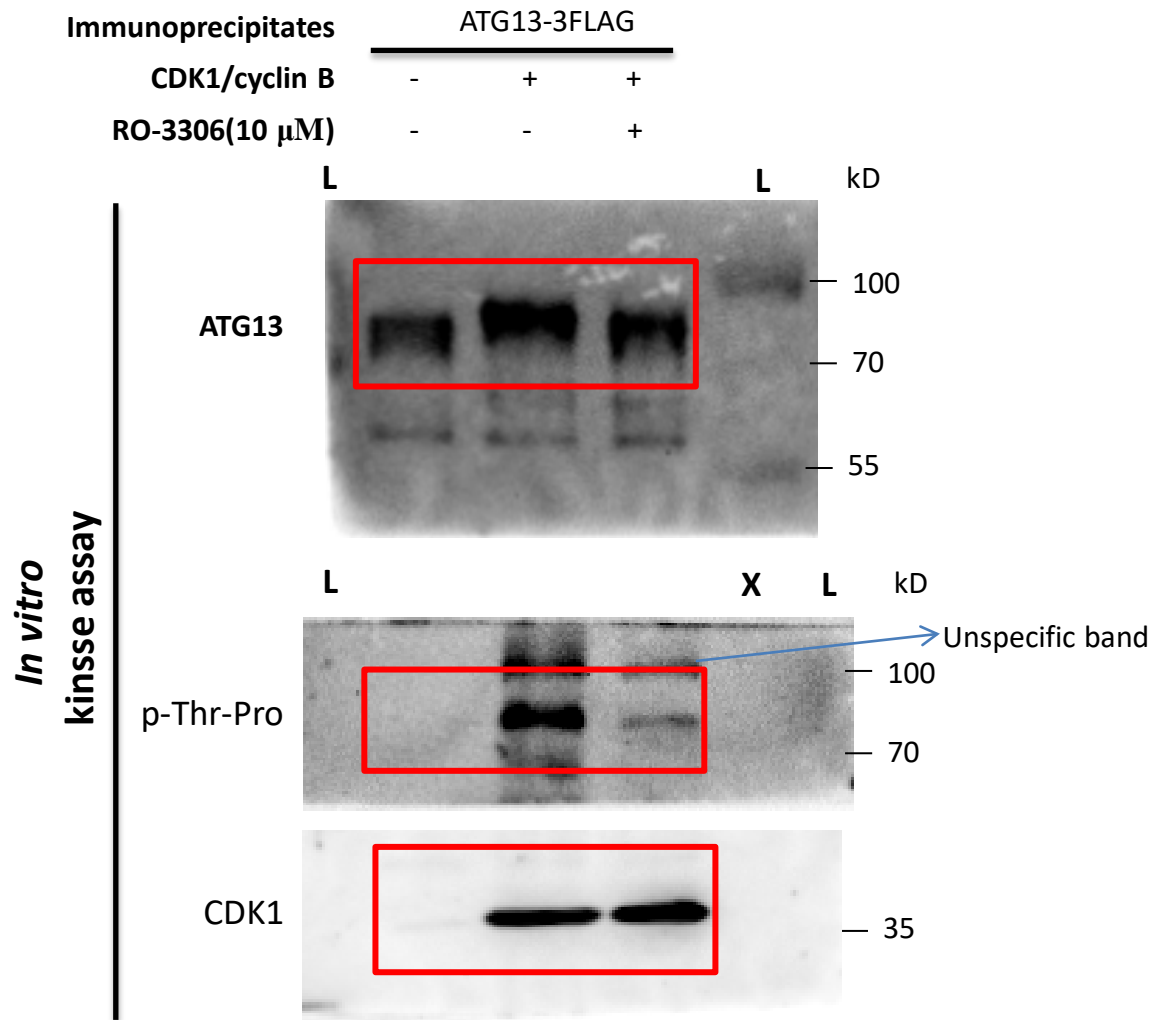**Fig 4F**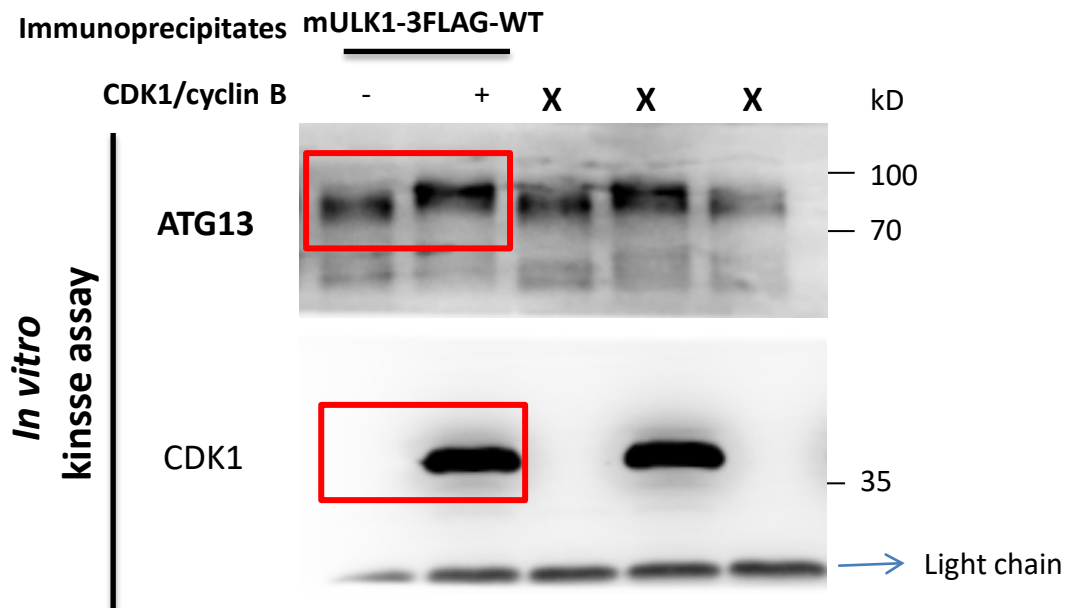

Images were acquired by chemiluminescence CCD camera-based digital imaging instruments (Tanon Fine-do X6). Approx. molecular weight ladder (L) was indicated. PVDF Membranes were cut for immunoblotting of more than one protein.

**Fig 5B**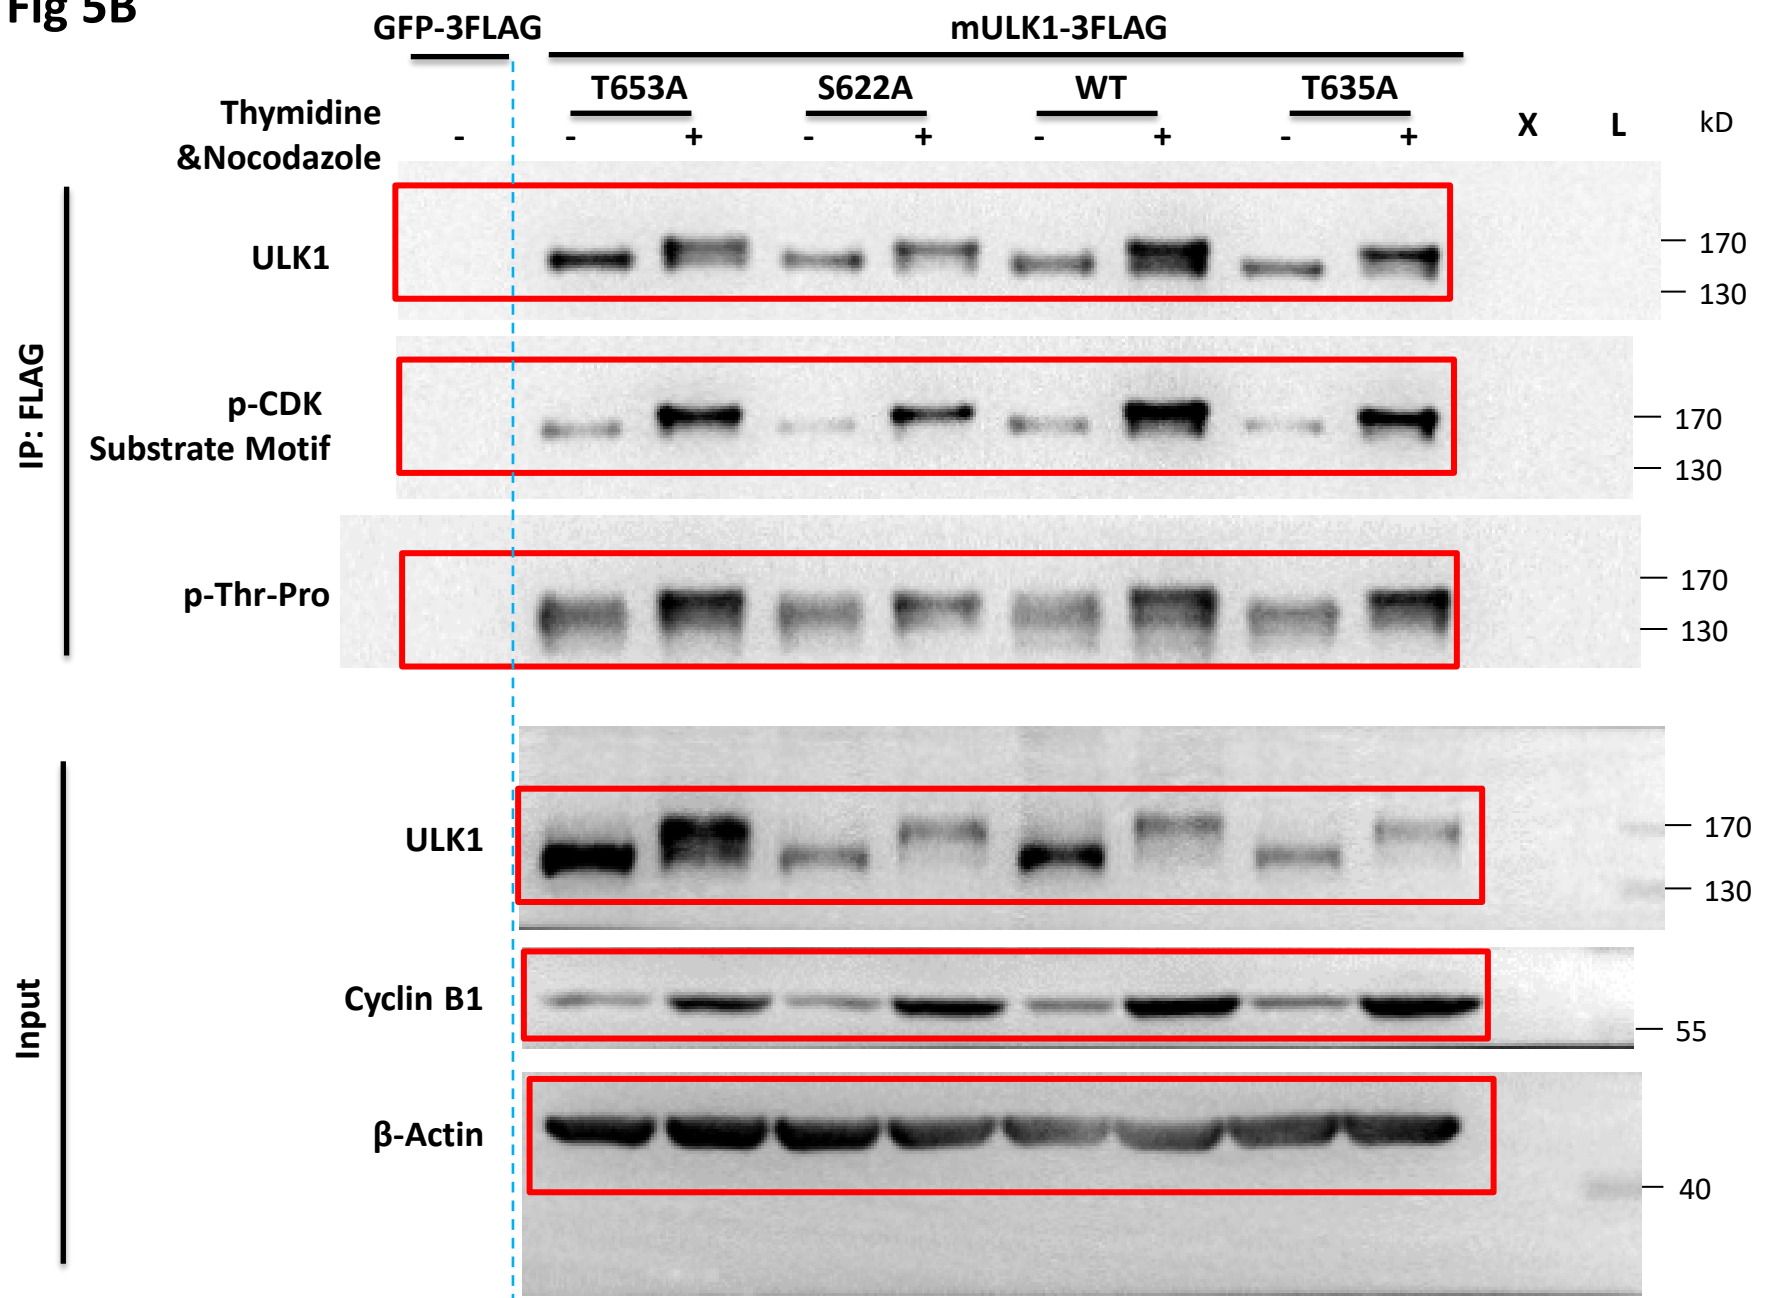

Images were acquired by chemiluminescence CCD camera-based digital imaging instruments (Tanon Fine-do X6). Approx. molecular weight ladder (L) was indicated. PVDF Membranes were cut for immunoblotting of more than one protein.

**Fig 5C**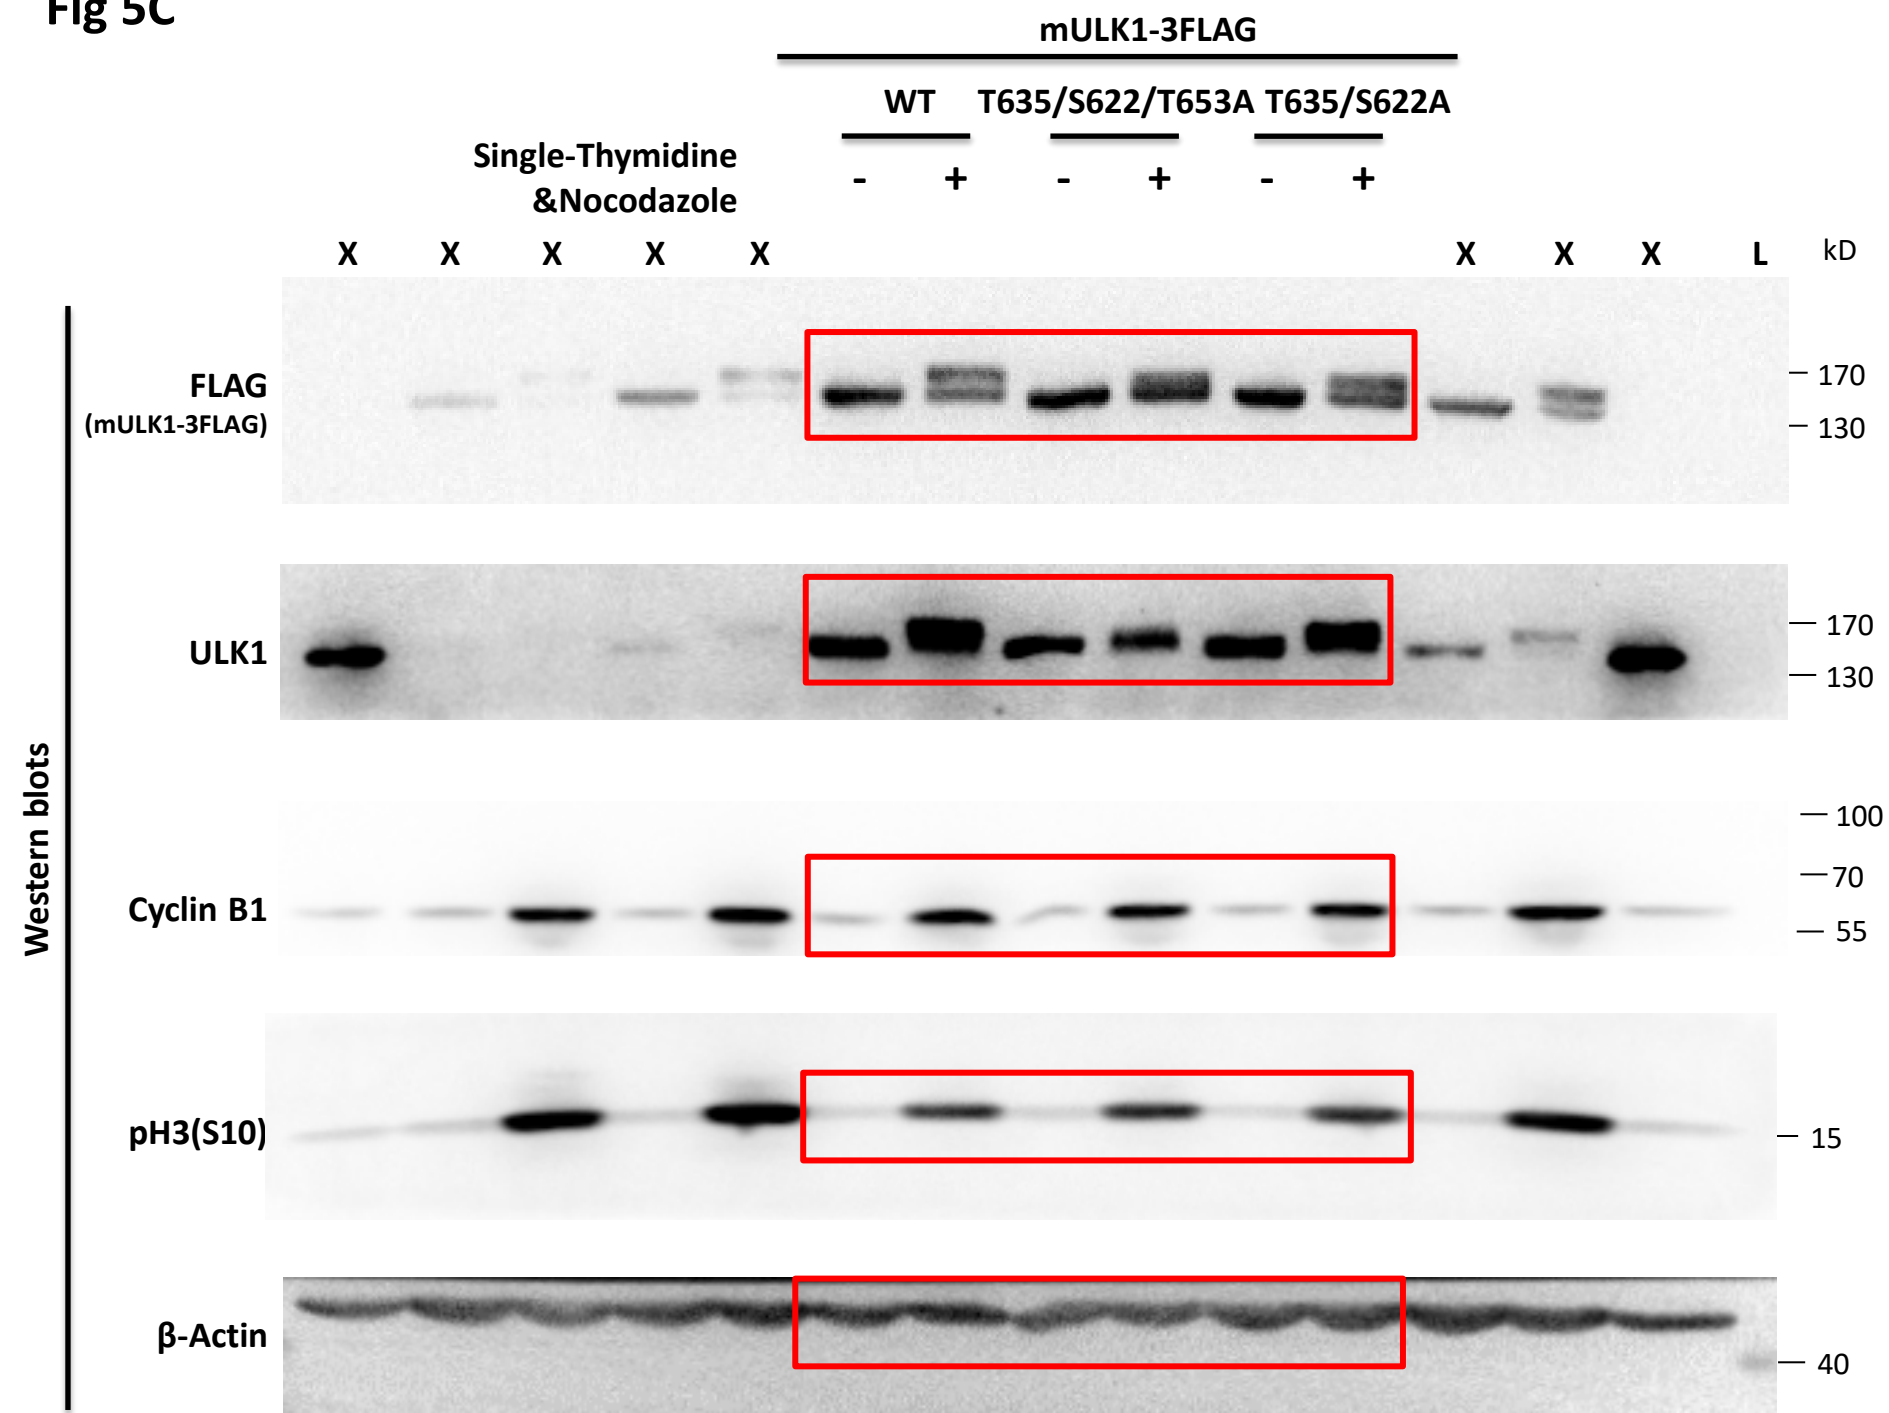

Images were acquired by chemiluminescence CCD camera-based digital imaging instruments (Tanon Fine-do X6). Approx. molecular weight ladder (L) was indicated. PVDF Membranes were cut for immunoblotting of more than one protein.



**Fig 5D**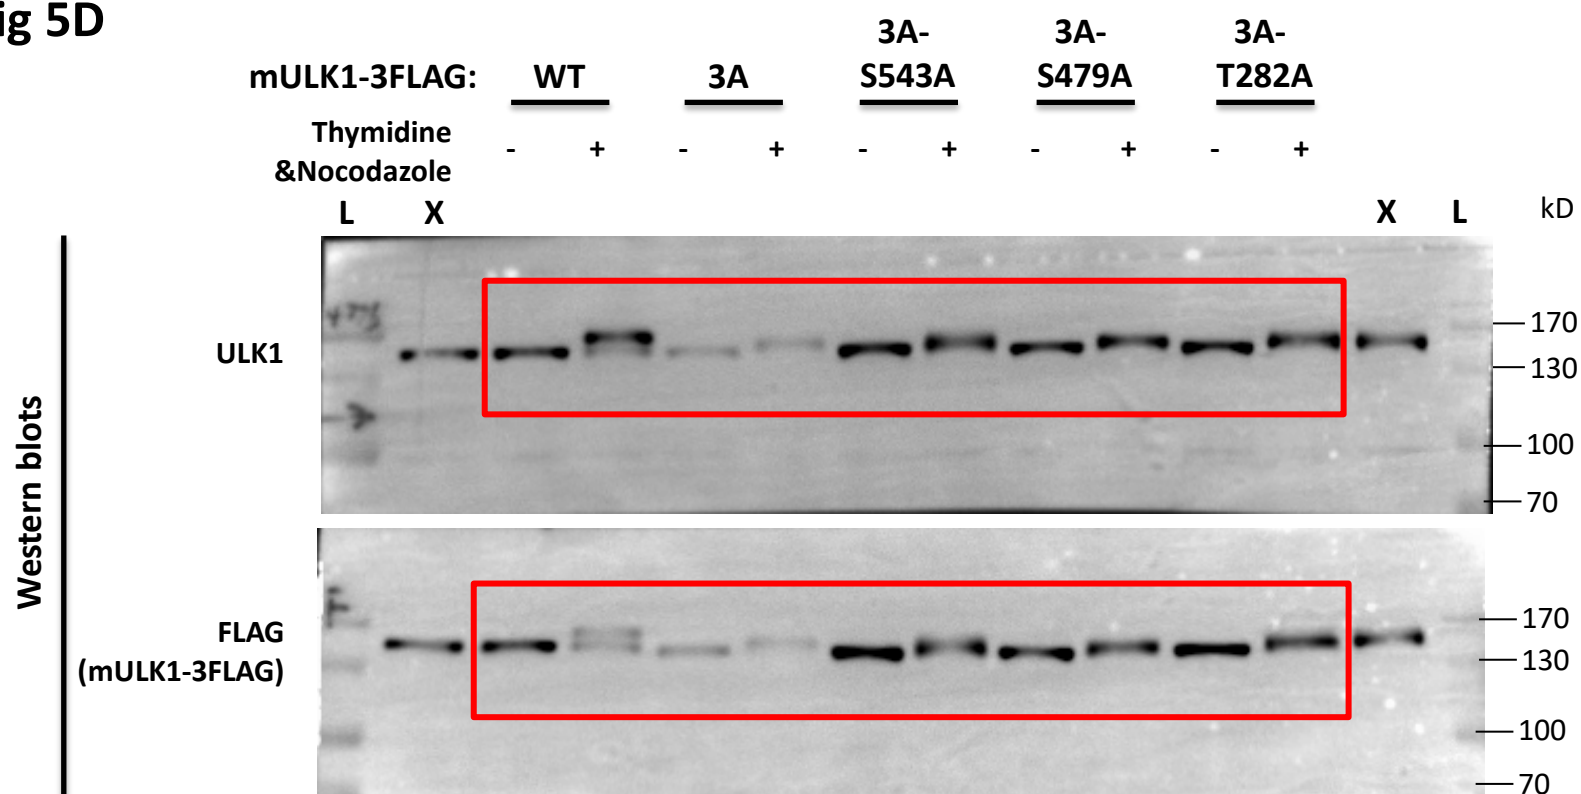**Fig 5E**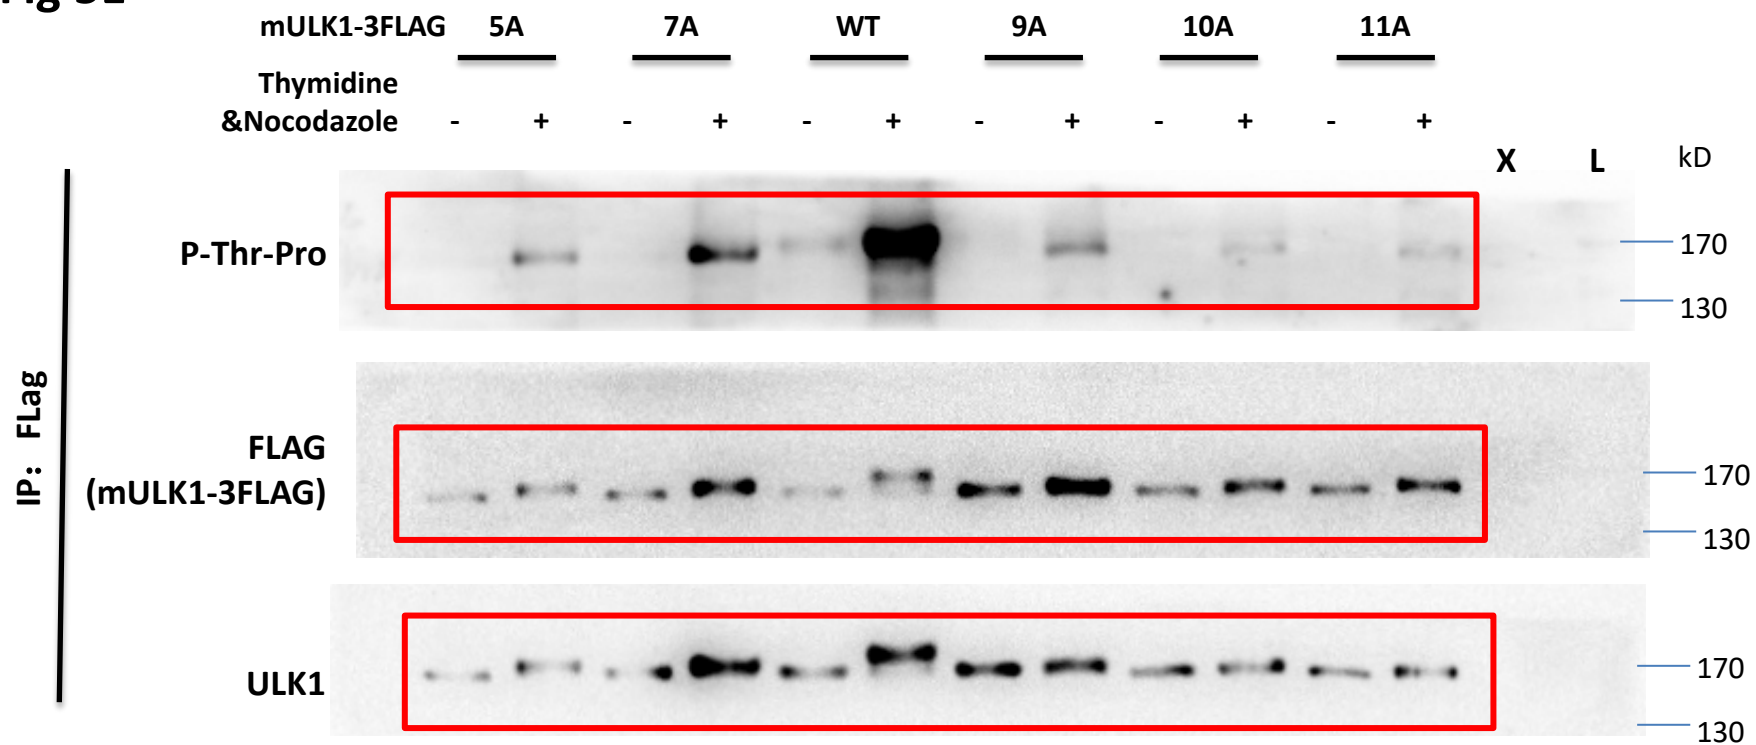

Images were acquired by chemiluminescence CCD camera-based digital imaging instruments (Tanon Fine-do X6). Approx. molecular weight ladder (L) was indicated. PVDF Membranes were cut for immunoblotting of more than one protein.

**Fig 5F**

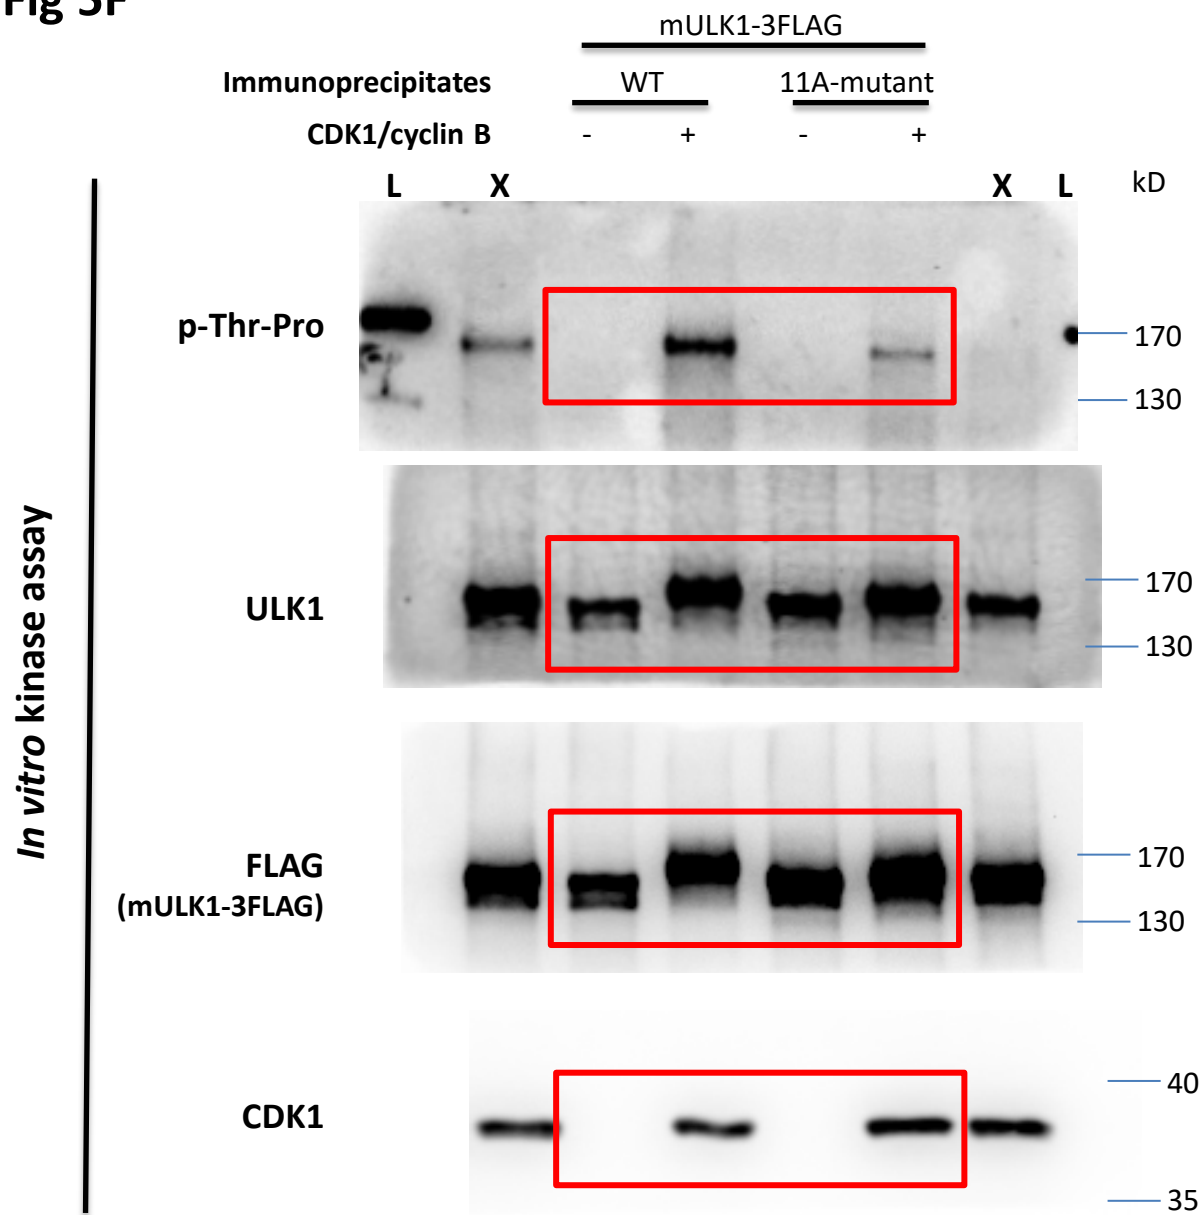

Images were acquired by chemiluminescence CCD camera-based digital imaging instruments (Tanon Fine-do X6). Approx. molecular weight ladder (L) was indicated. PVDF Membranes were cut for immunoblotting of more than one protein.

**Fig 5H**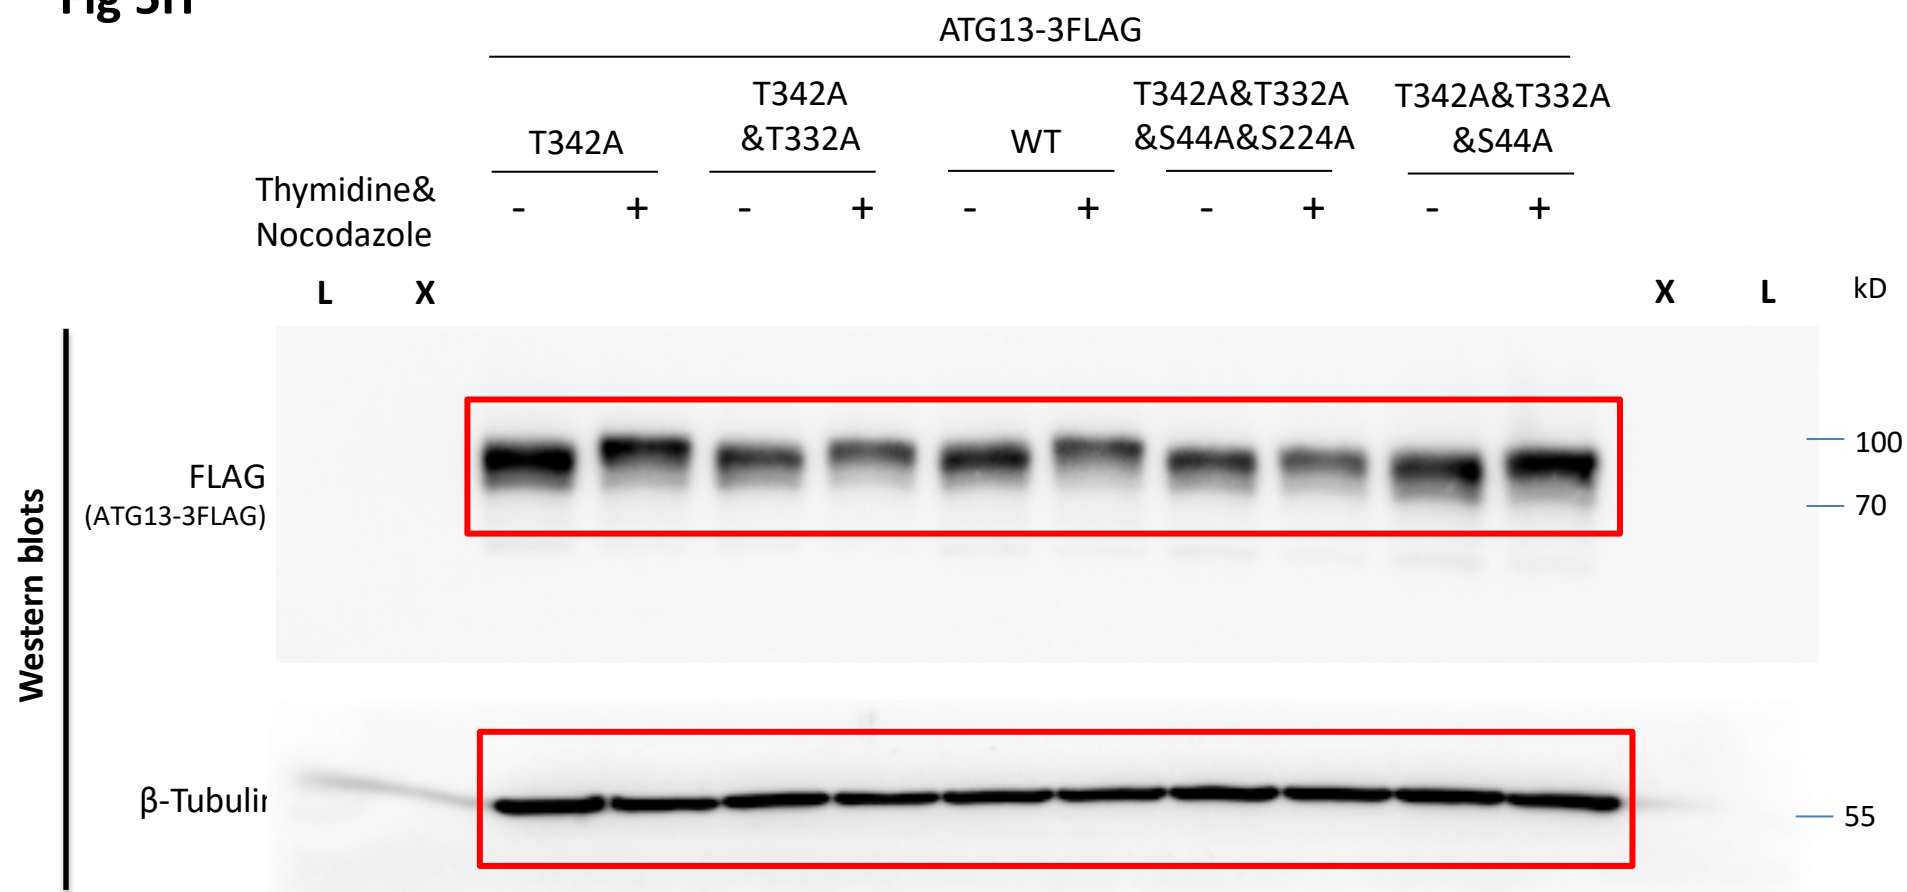

Images were acquired by chemiluminescence CCD camera-based digital imaging instruments (Tanon Fine-do X6). Approx. molecular weight ladder (L) was indicated. PVDF Membranes were cut for immunoblotting of more than one protein.

**Fig 5I**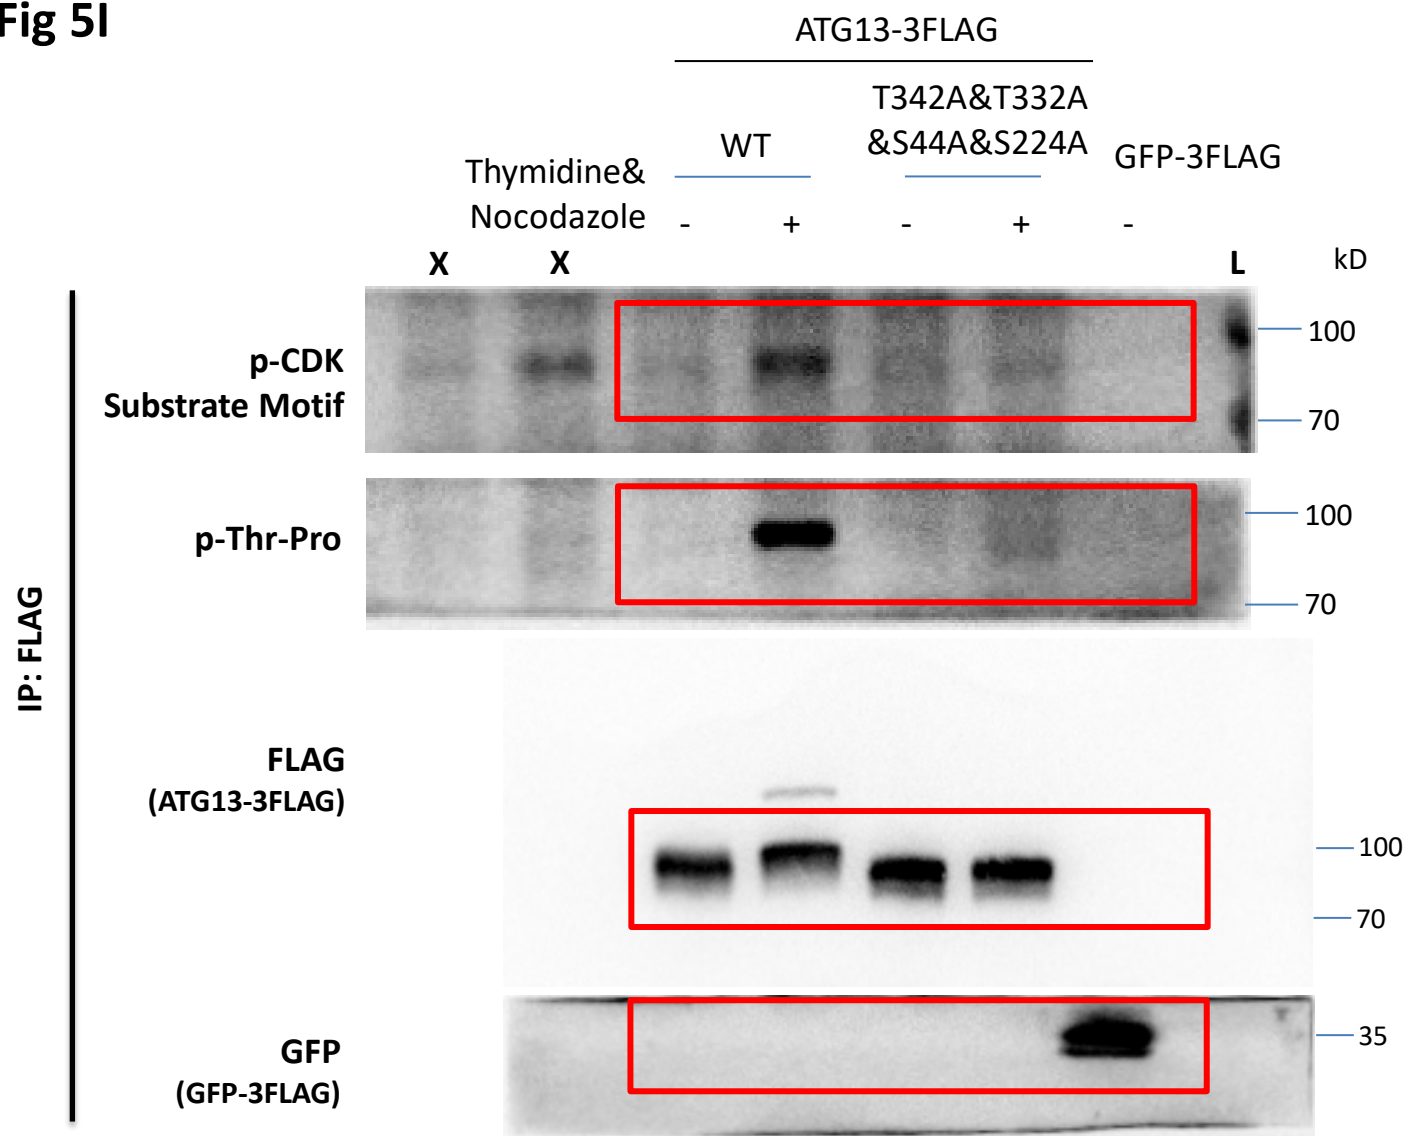

Images were acquired by chemiluminescence CCD camera-based digital imaging instruments (Tanon Fine-do X6). Approx. molecular weight ladder (L) was indicated. PVDF Membranes were cut for immunoblotting of more than one protein.

**Fig 5I**

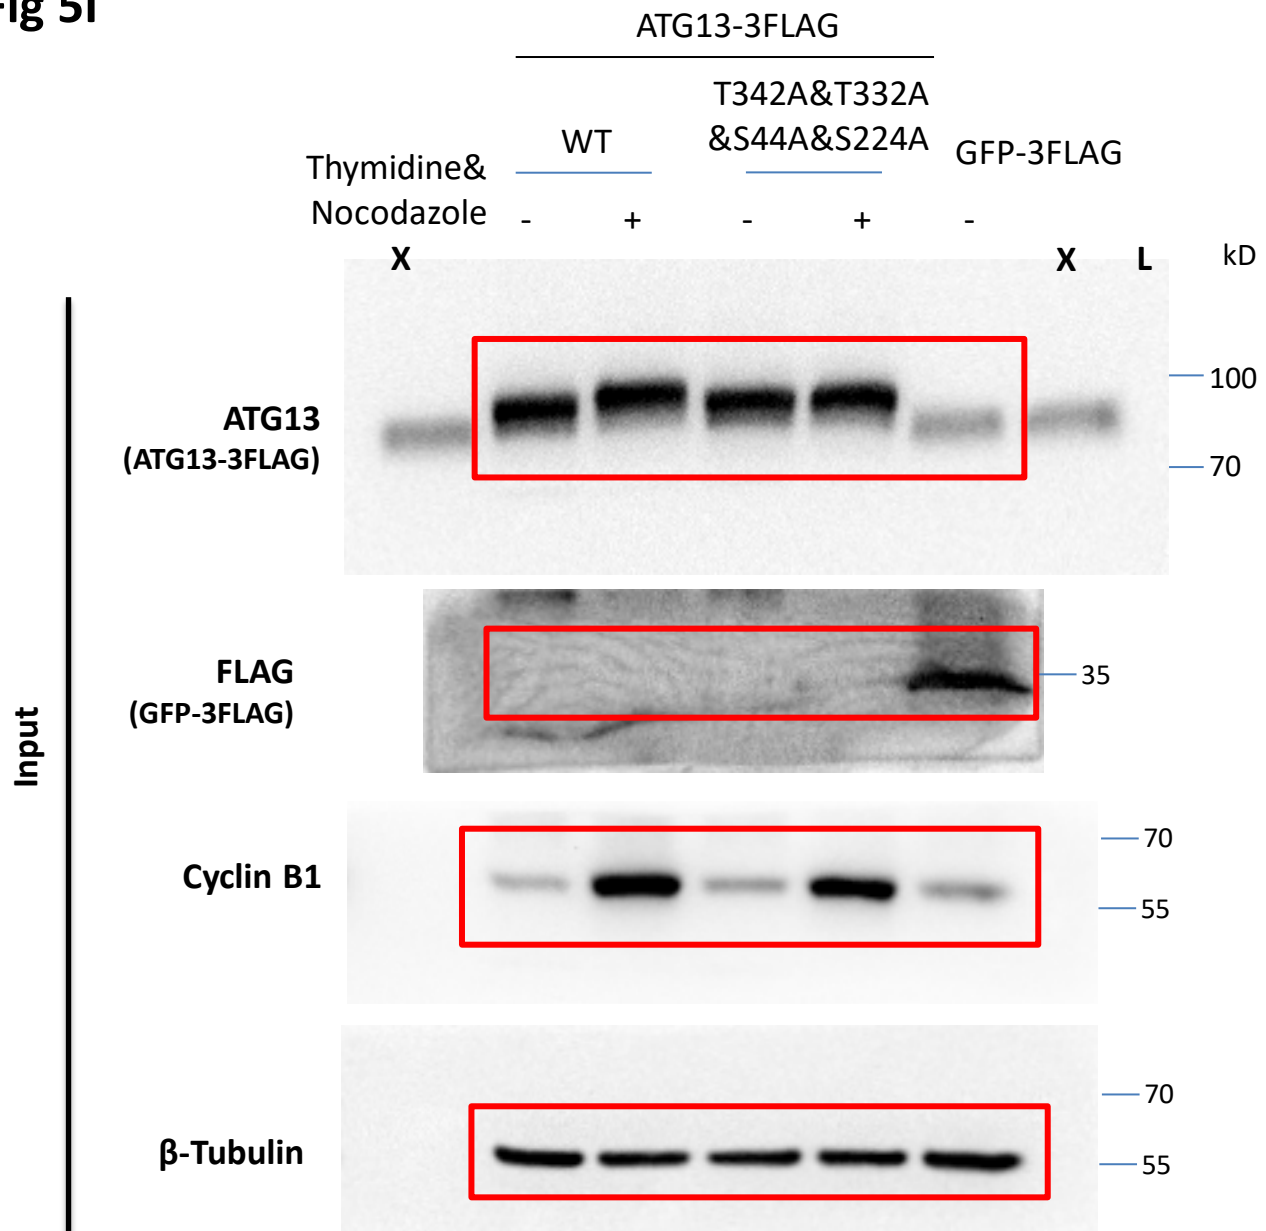

Images were acquired by chemiluminescence CCD camera-based digital imaging instruments (Tanon Fine-do X6).  
Approx. molecular weight ladder (L) was indicated.  
PVDF Membranes were cut for immunoblotting of more than one protein.

**Fig 6B**

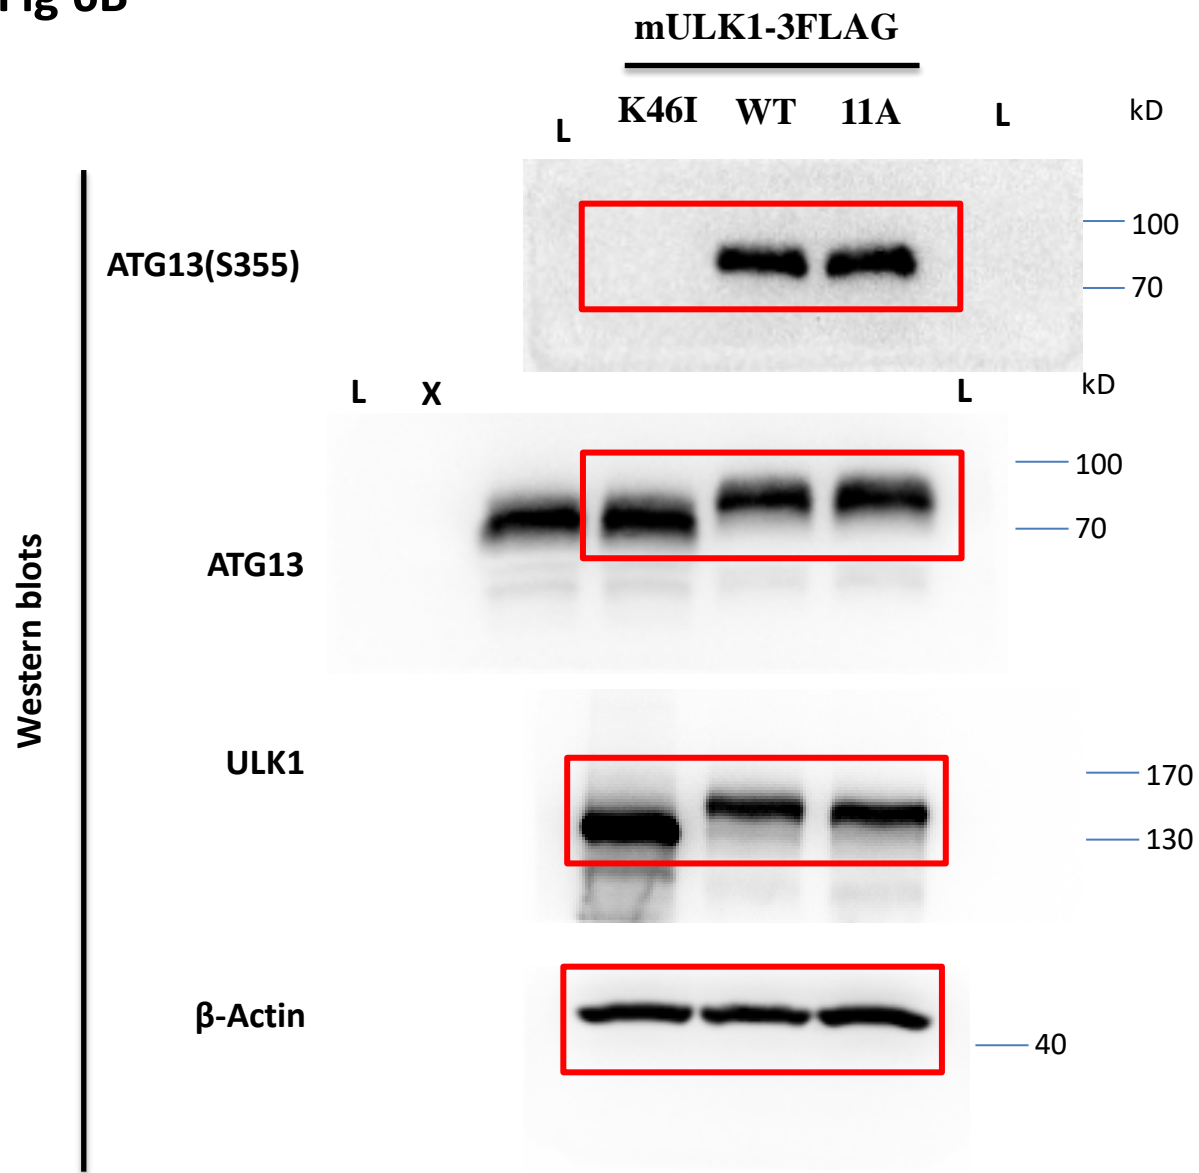

Images were acquired by chemiluminescence CCD camera-based digital imaging instruments (Tanon Fine-do X6).  
Approx. molecular weight ladder (L) was indicated.  
PVDF Membranes were cut for immunoblotting of more than one protein.

**Fig 6D**

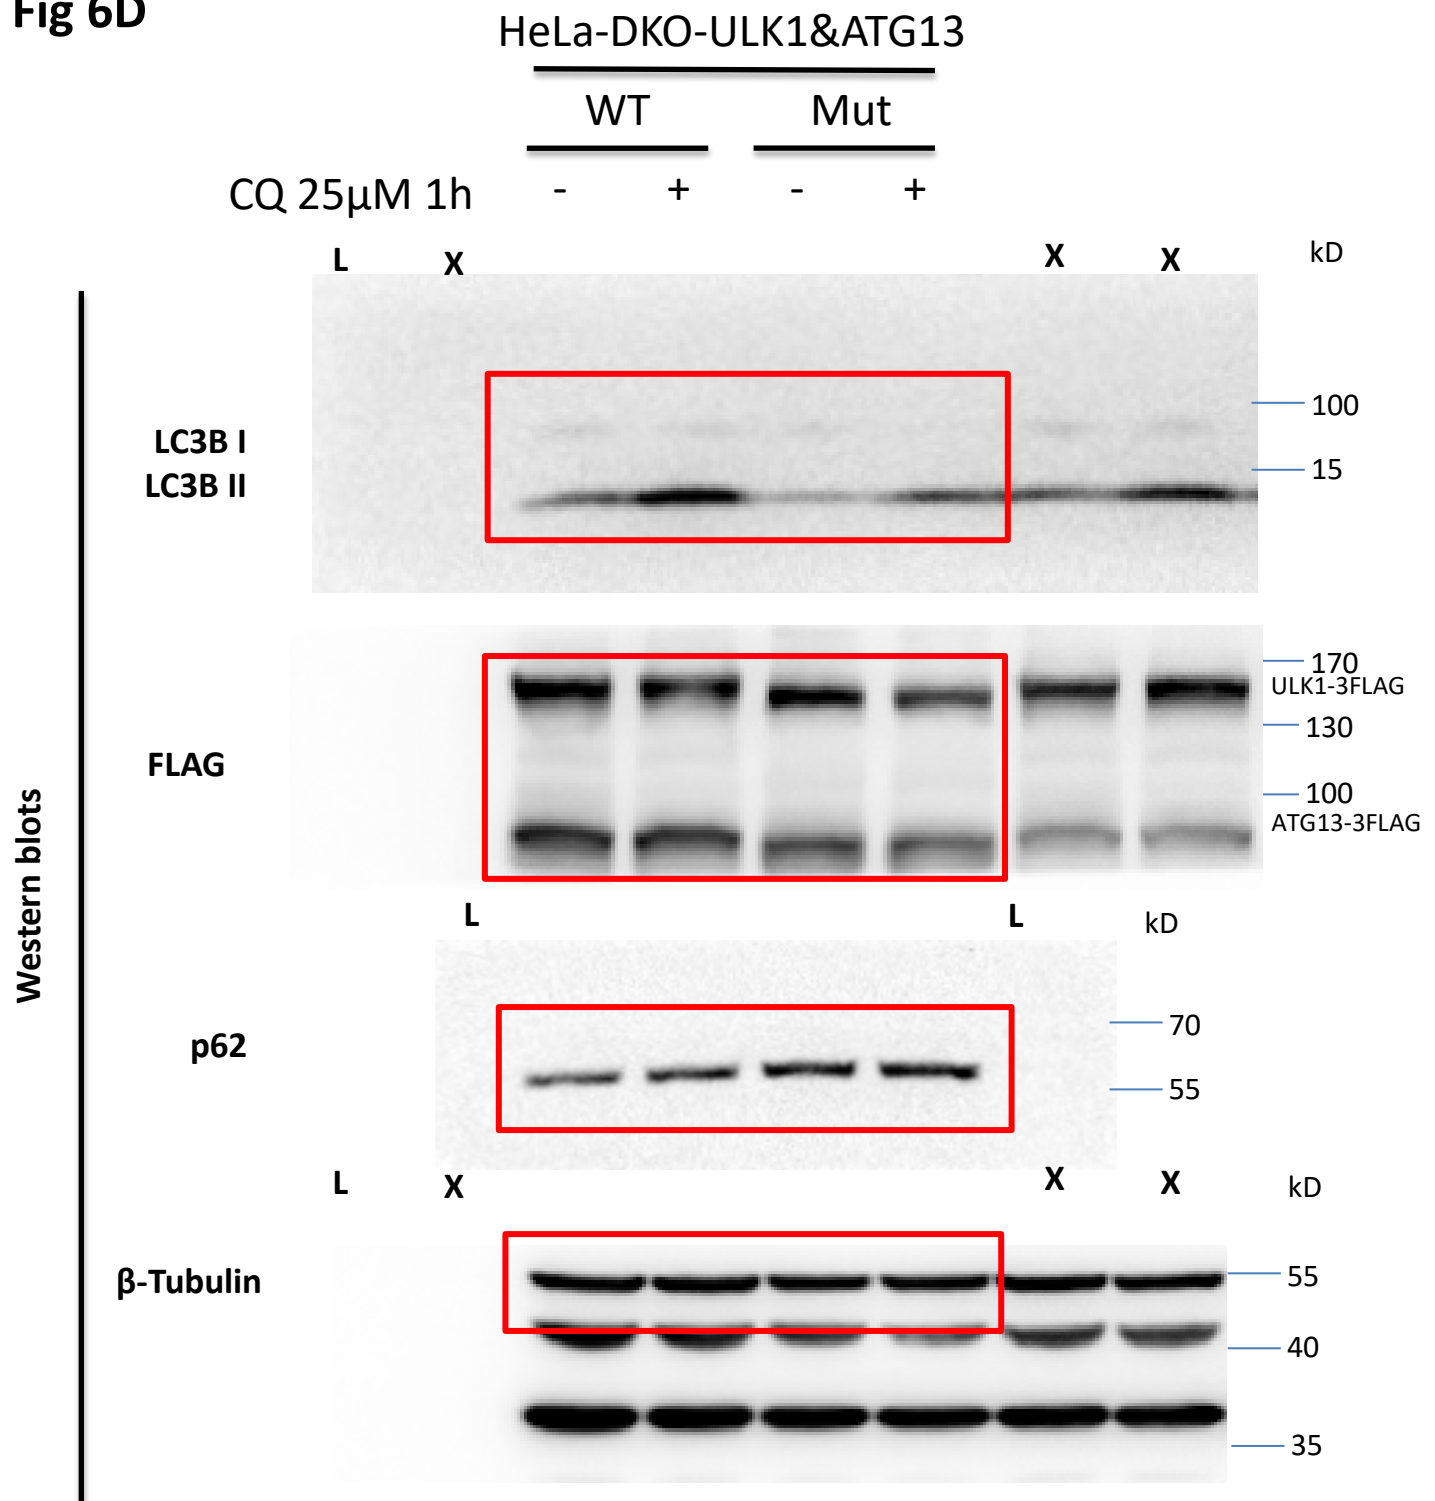

Images were acquired by chemiluminescence CCD camera-based digital imaging instruments (Tanon Fine-do X6). Approx. molecular weight ladder (L) was indicated. PVDF Membranes were cut for immunoblotting of more than one protein.

**Fig 7B**

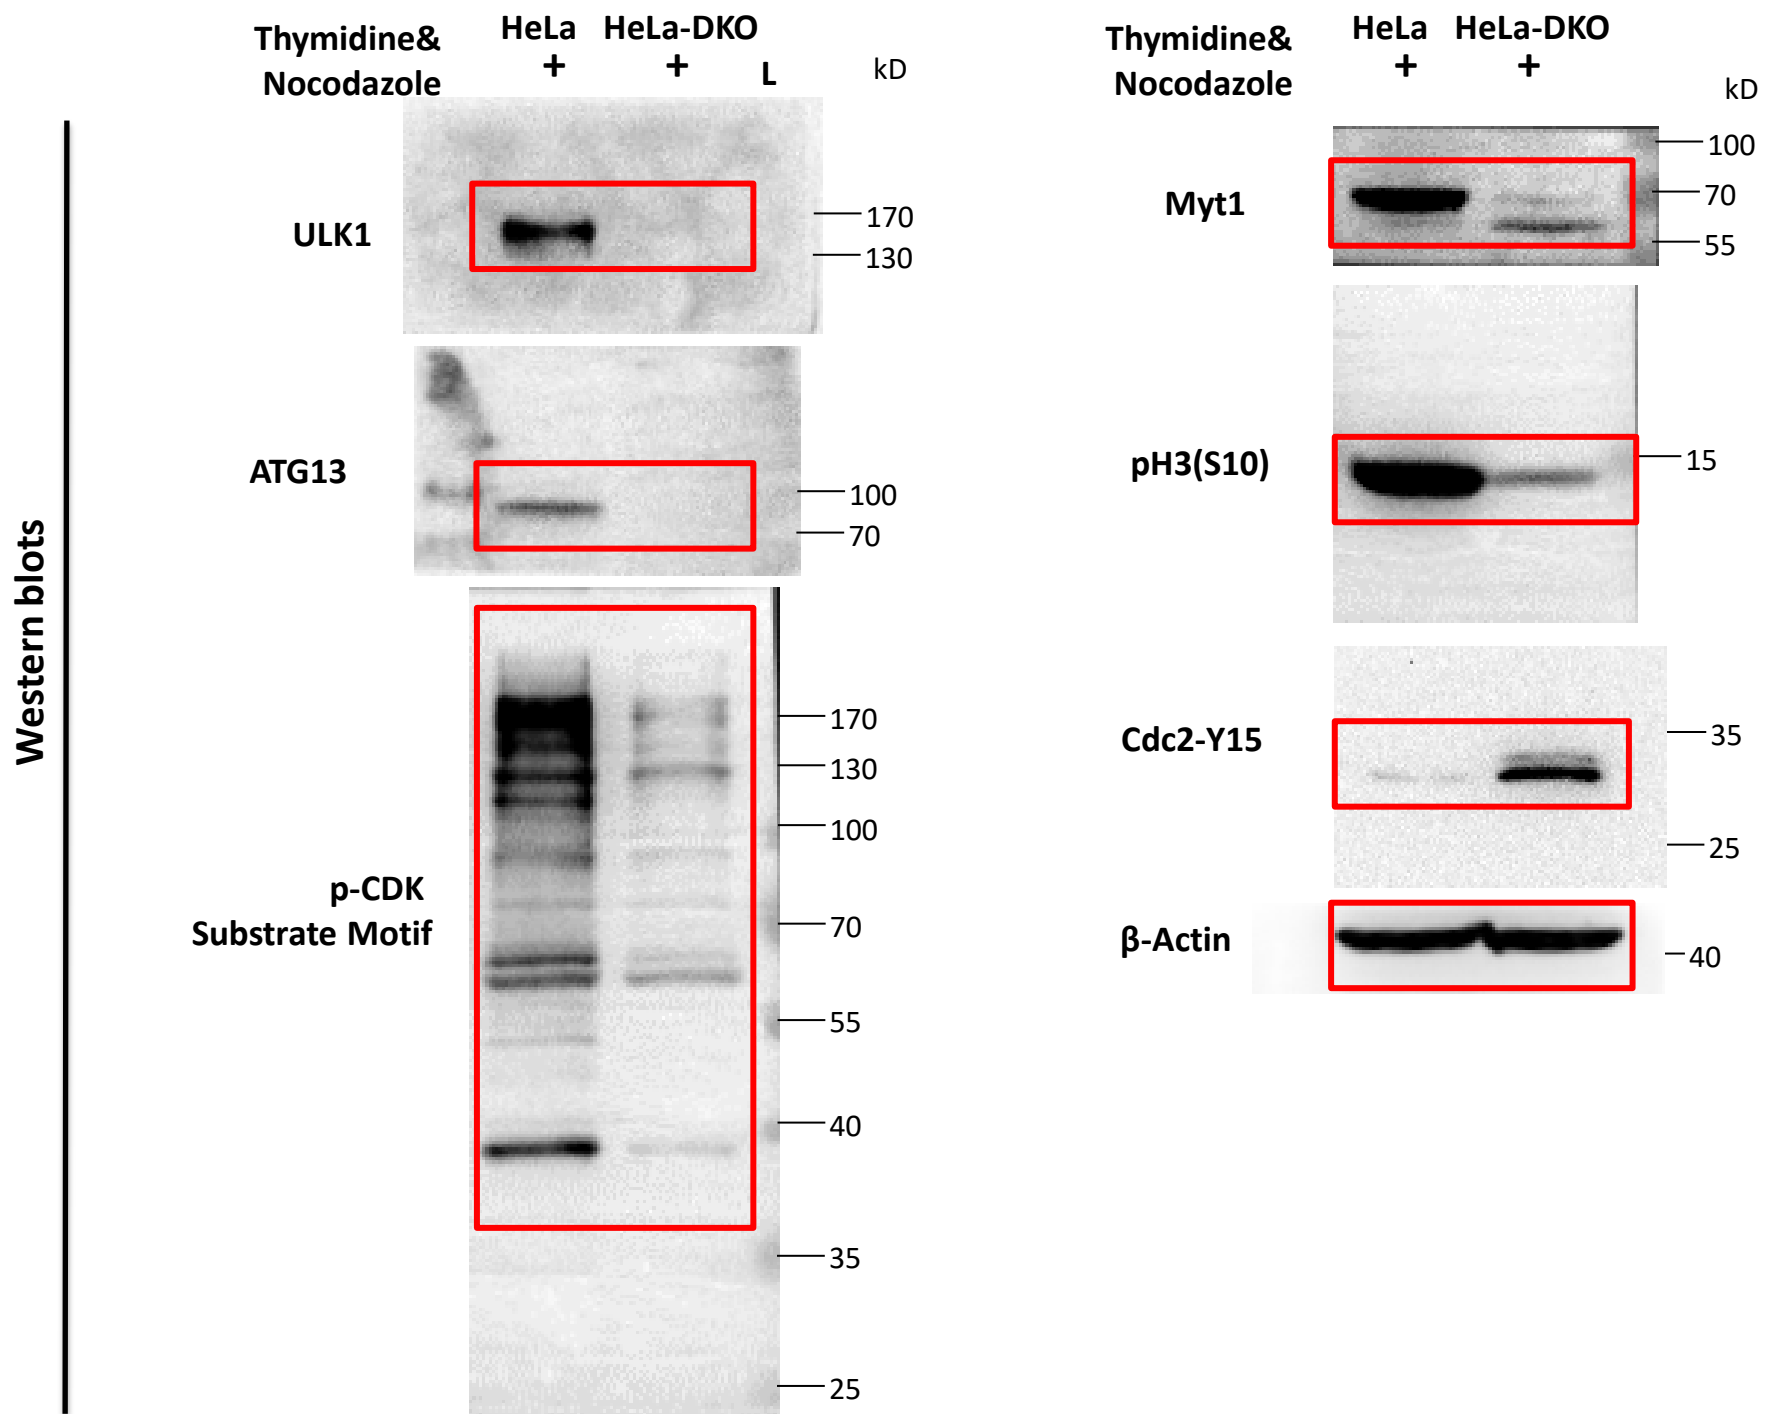

Images were acquired by chemiluminescence CCD camera-based digital imaging instruments (Tanon Fine-do X6). Approx. molecular weight ladder (L) was indicated. PVDF Membranes were cut for immunoblotting of more than one protein.



# Supplementary Figures

**S1A Fig**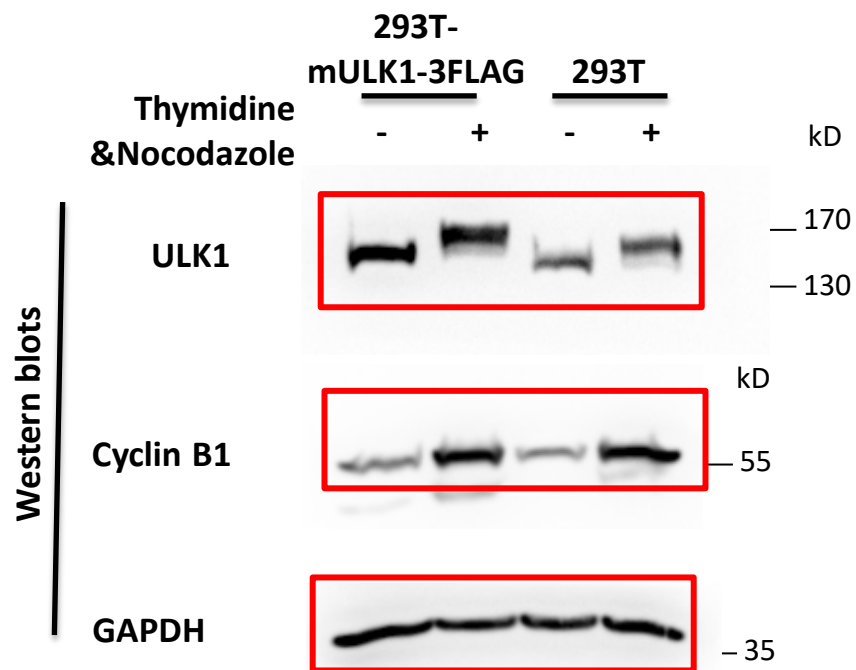**S1B Fig**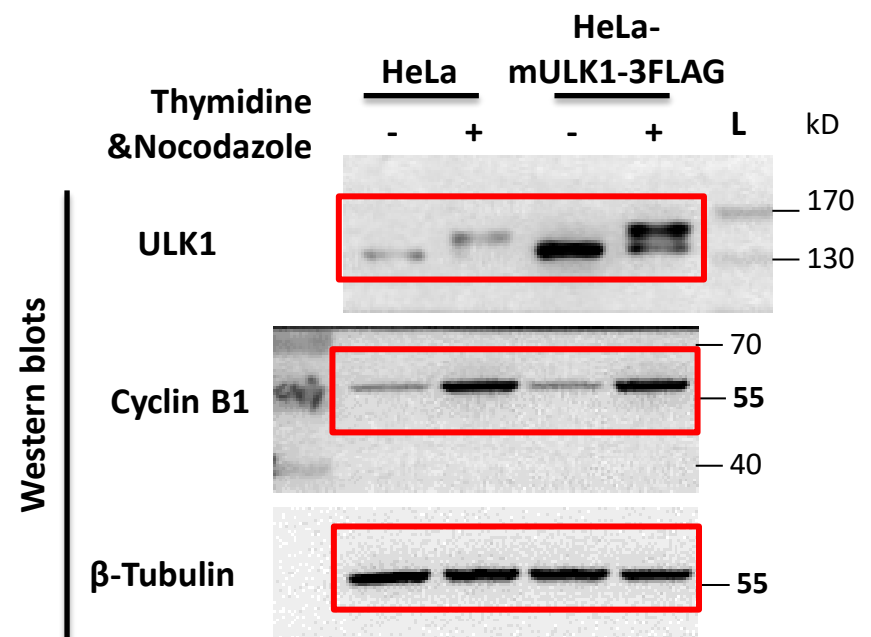**S1C Fig**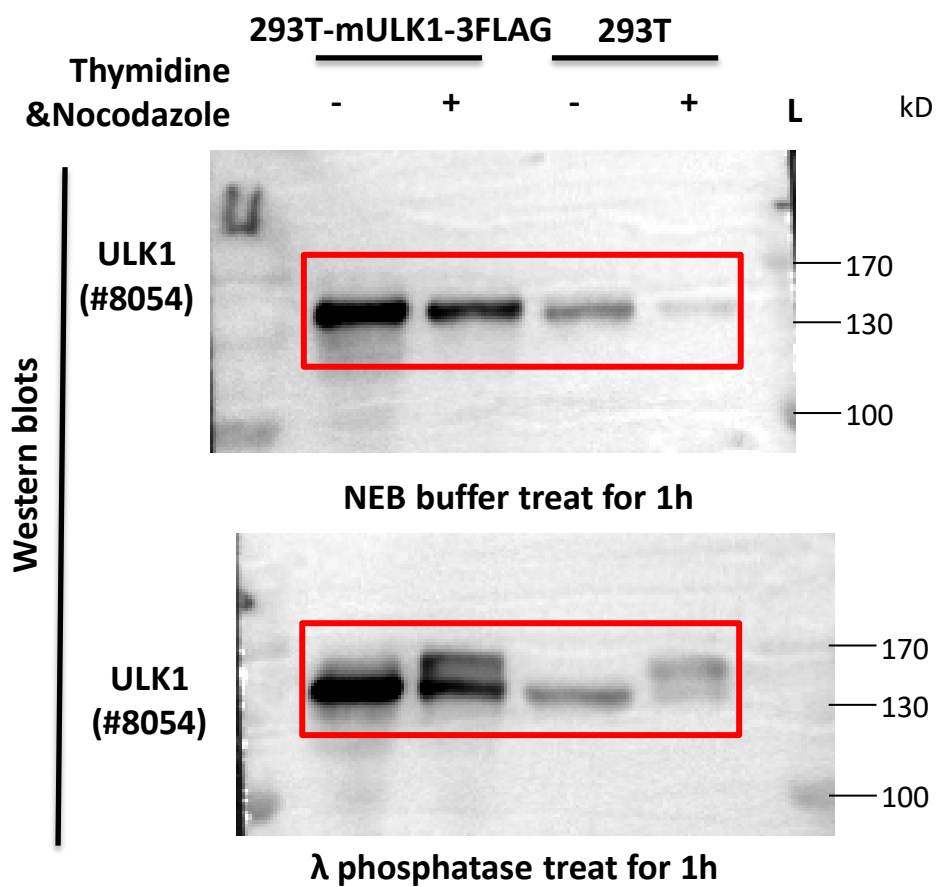

Images were acquired by chemiluminescence CCD camera-based digital imaging instruments (Tanon Fine-do X6). Approx. molecular weight ladder (L) was indicated. PVDF Membranes were cut for immunoblotting of more than one protein.

**S2A Fig**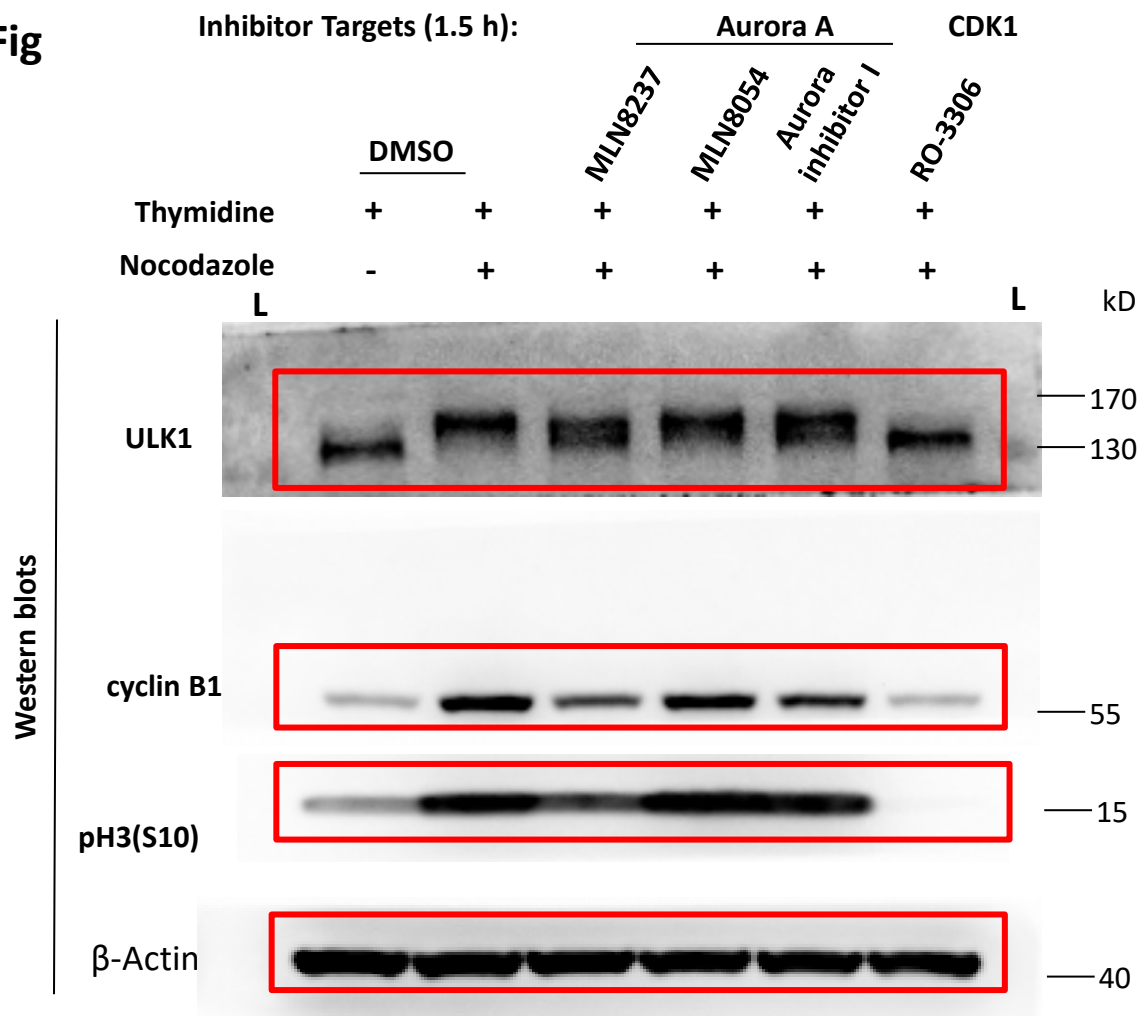**S2B Fig**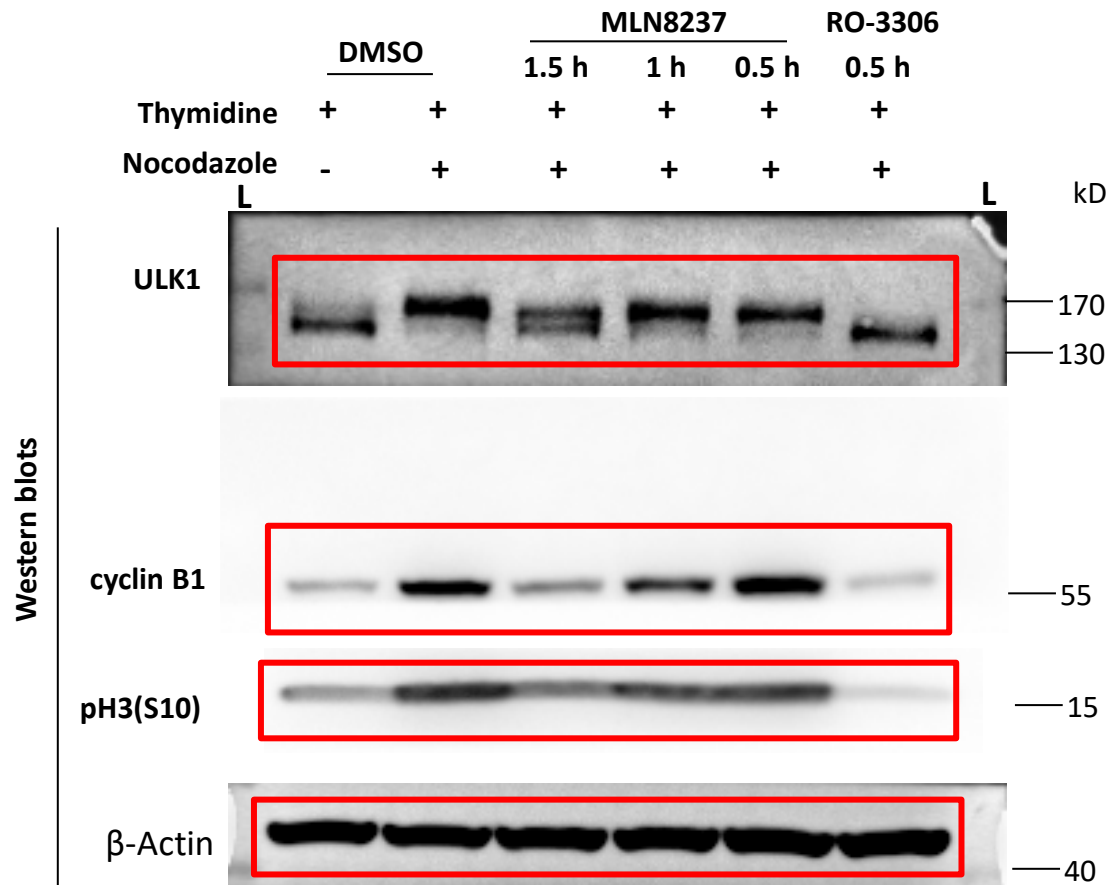

Images were acquired by chemiluminescence CCD camera-based digital imaging instruments (Tanon Fine-do X6). Approx. molecular weight ladder (L) was indicated. PVDF Membranes were cut for immunoblotting of more than one protein.

**S3A Fig**

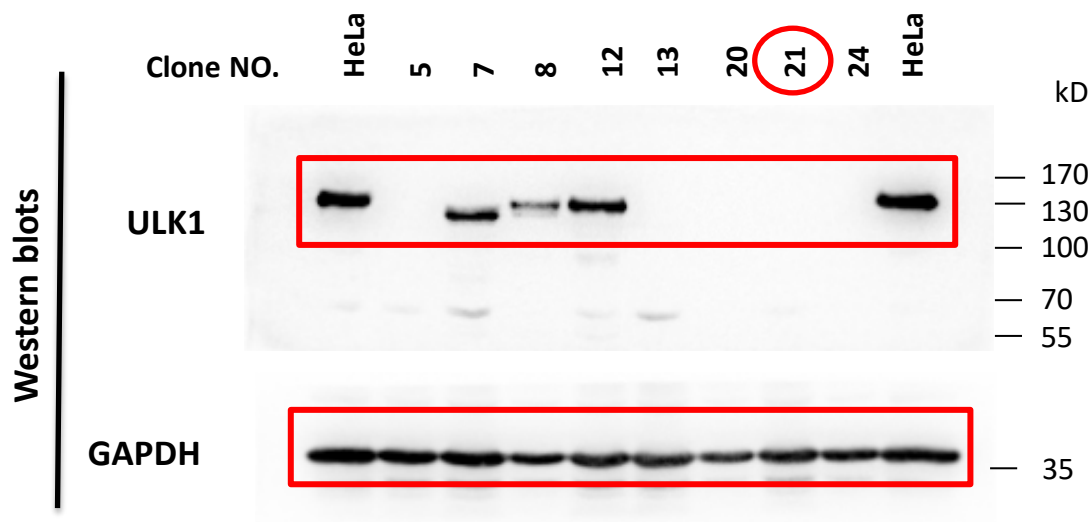

**S3B Fig**

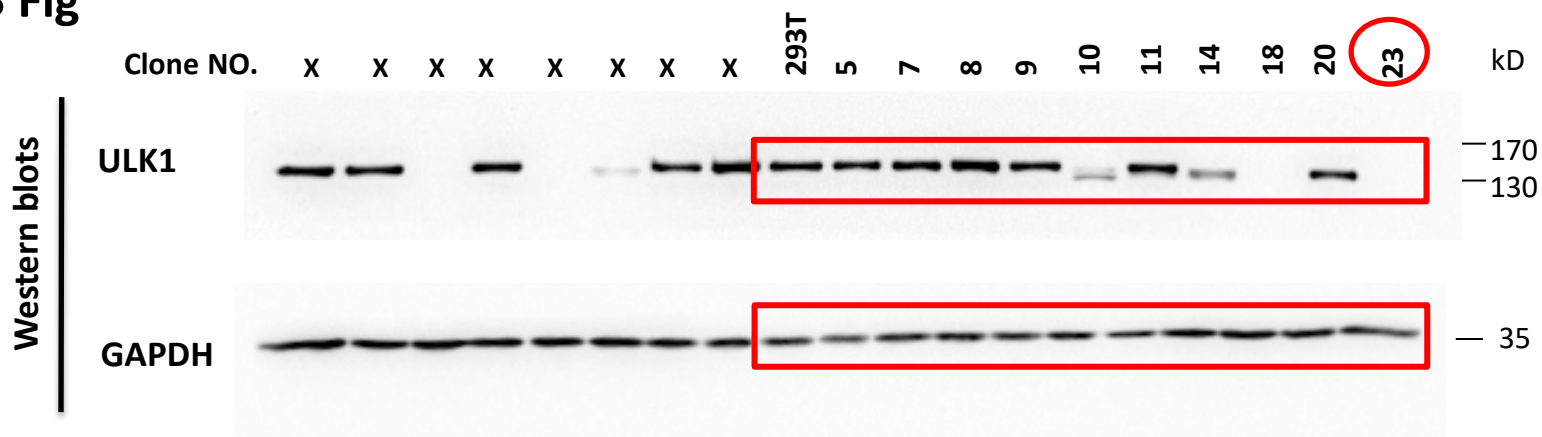

Images were acquired by chemiluminescence CCD camera-based digital imaging instruments (Tanon Fine-do X6).  
Approx. molecular weight ladder (L) was indicated.  
PVDF Membranes were cut for immunoblotting of more than one protein.

# S3C Fig

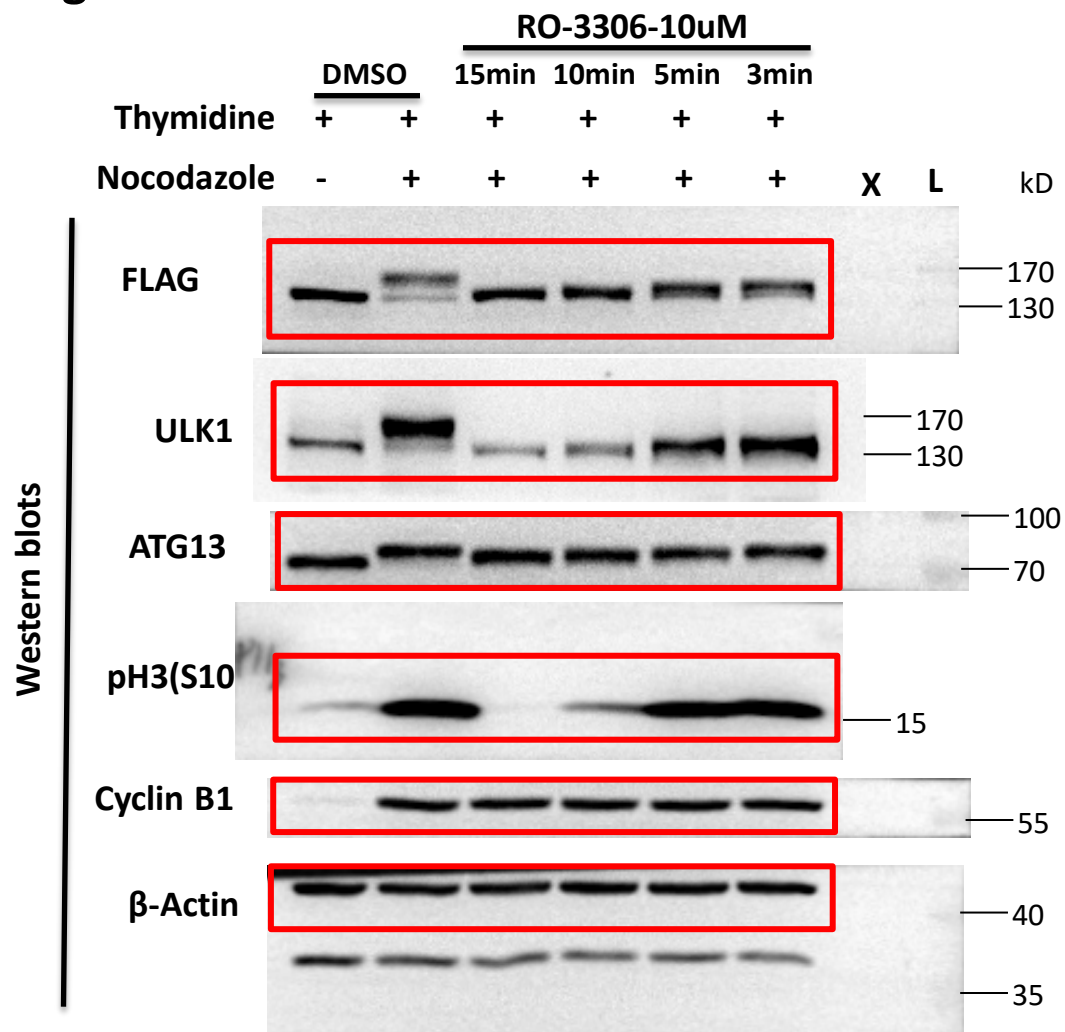

Images were acquired by chemiluminescence CCD camera-based digital imaging instruments (Tanon Fine-do X6). Approx. molecular weight ladder (L) was indicated. PVDF Membranes were cut for immunoblotting of more than one protein.

**S3D Fig**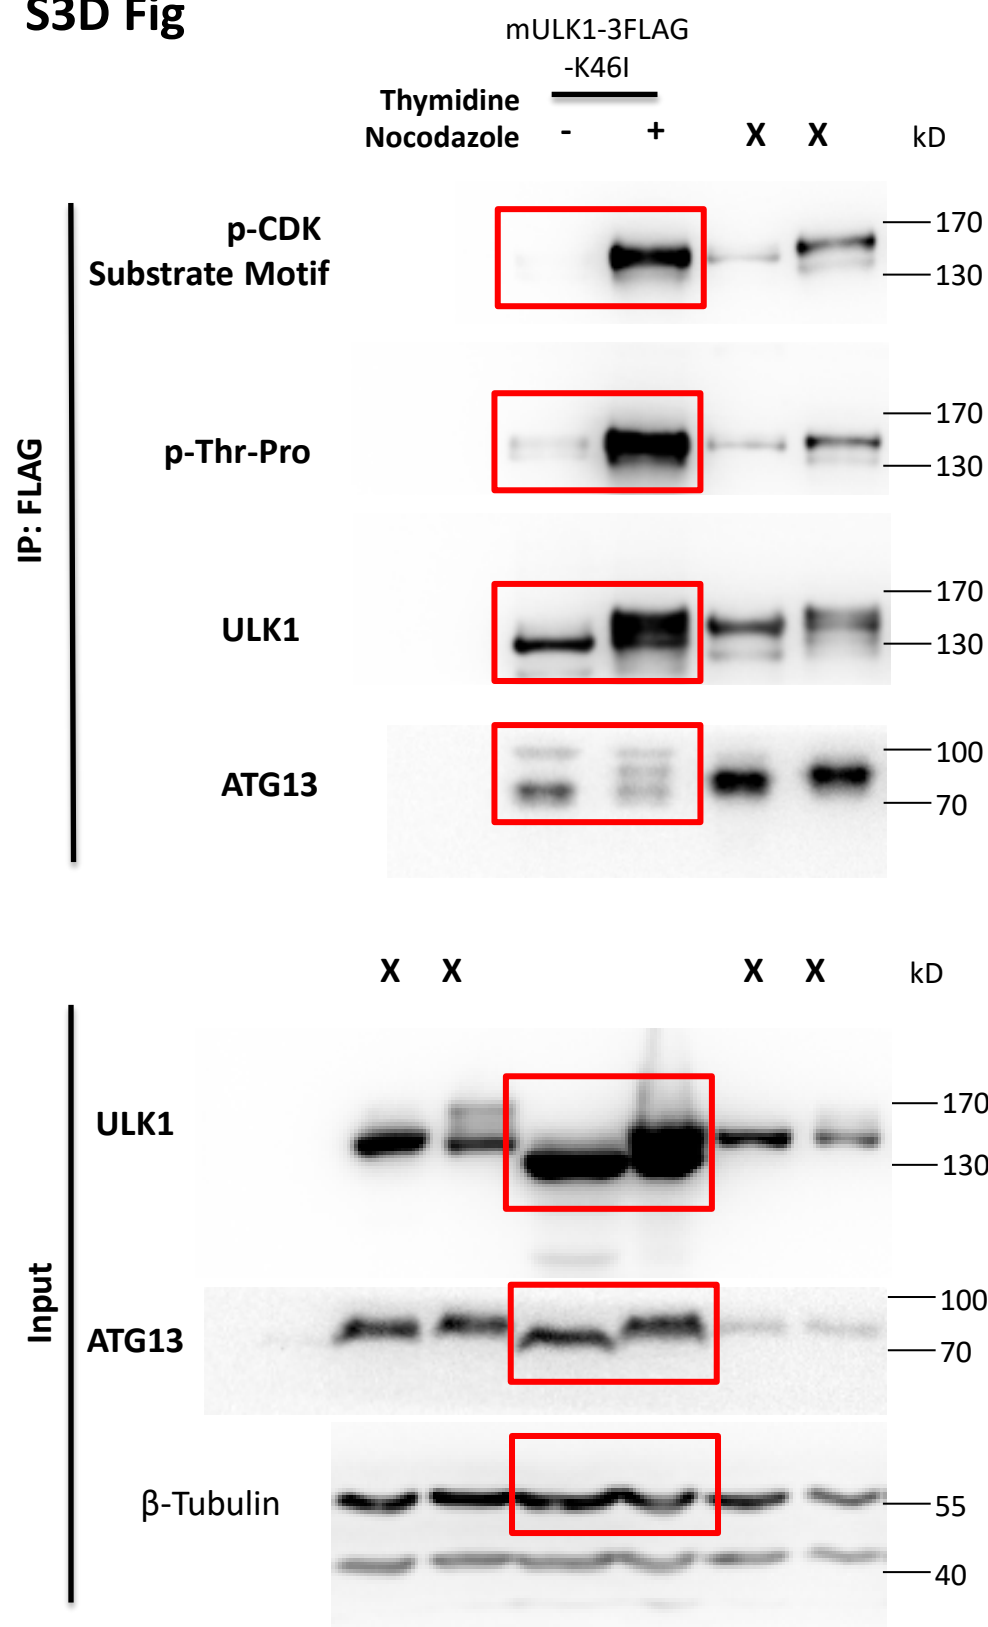**S3E Fig**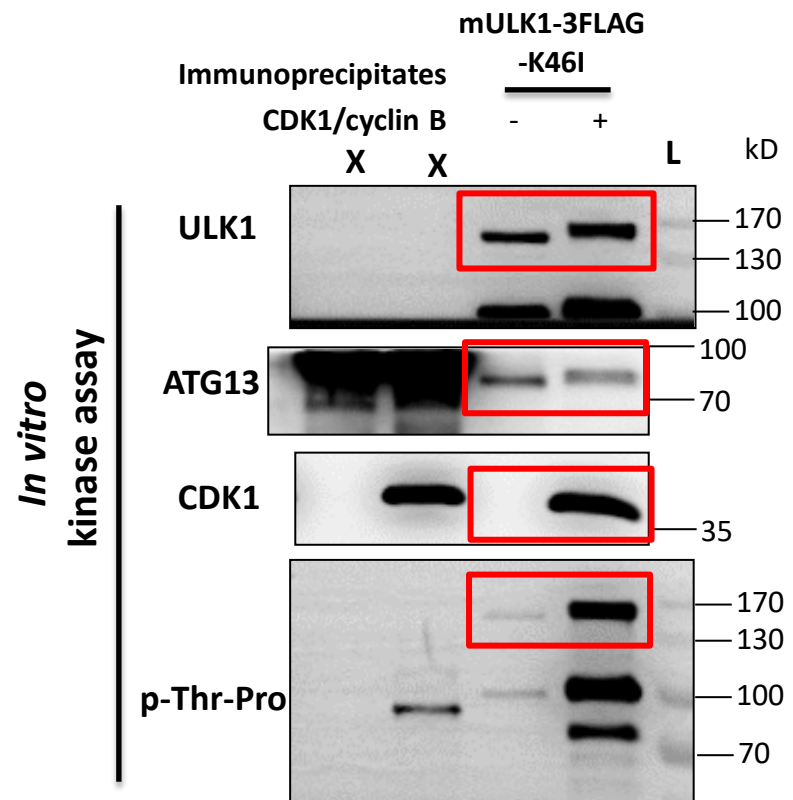

Images were acquired by chemiluminescence CCD camera-based digital imaging instruments (Tanon Fine-do X6). Approx. molecular weight ladder (L) was indicated. PVDF Membranes were cut for immunoblotting of more than one protein.

# S4 Fig

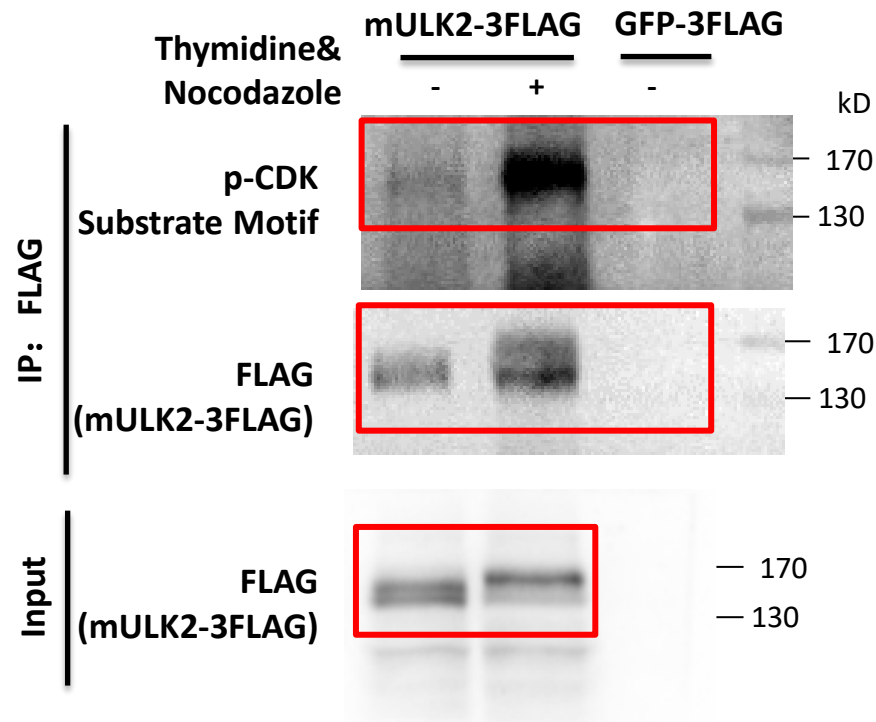

Images were acquired by chemiluminescence CCD camera-based digital imaging instruments (Tanon Fine-do X6). Approx. molecular weight ladder (L) was indicated. PVDF Membranes were cut for immunoblotting of more than one protein.

# S5A Fig

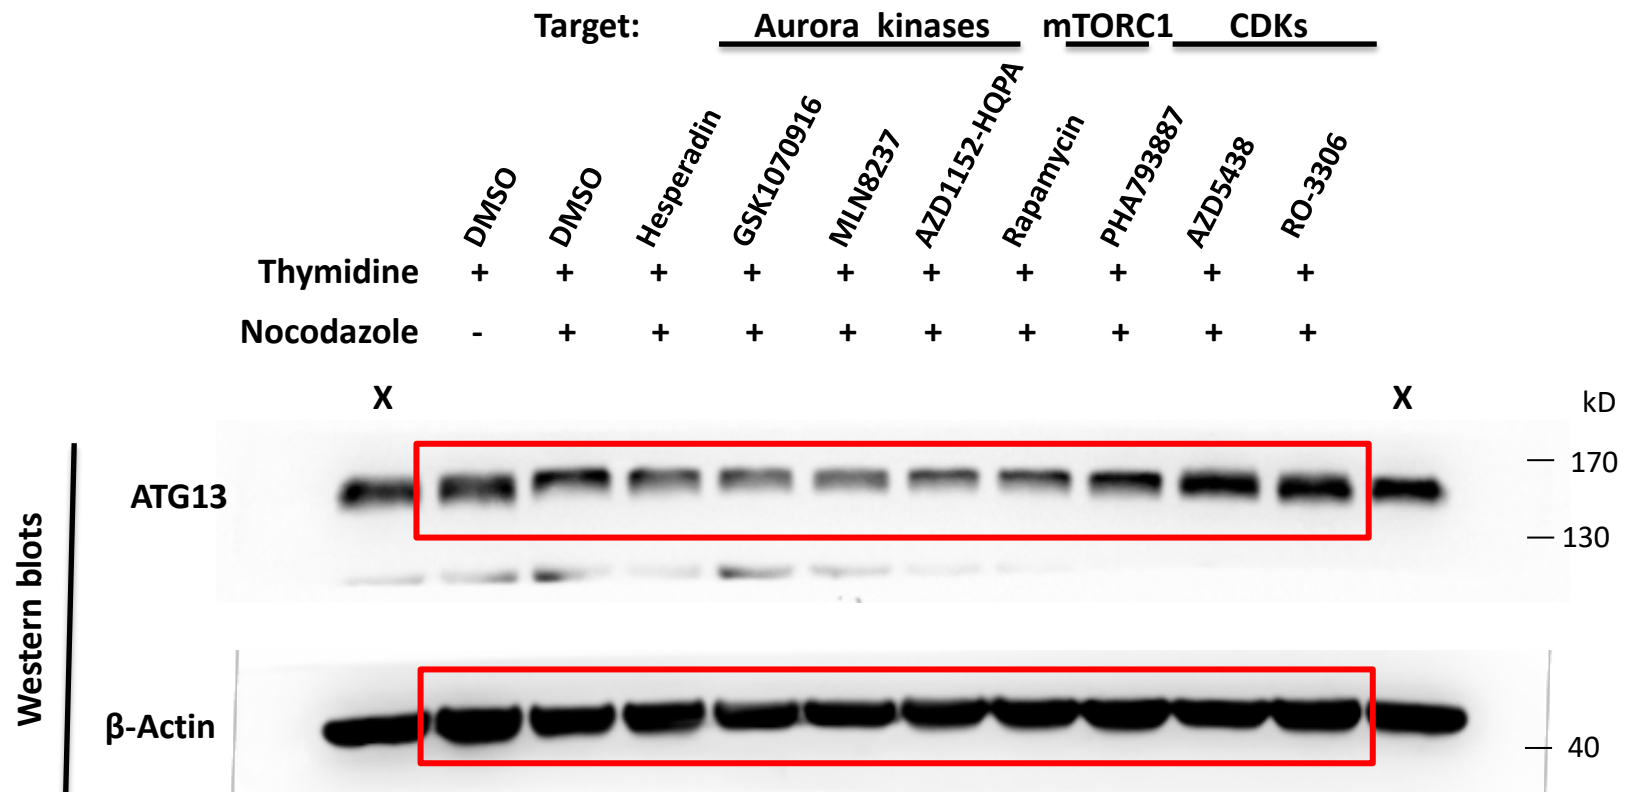

Images were acquired by chemiluminescence CCD camera-based digital imaging instruments (Tanon Fine-do X6). Approx. molecular weight ladder (L) was indicated. PVDF Membranes were cut for immunoblotting of more than one protein.



# S5B Fig

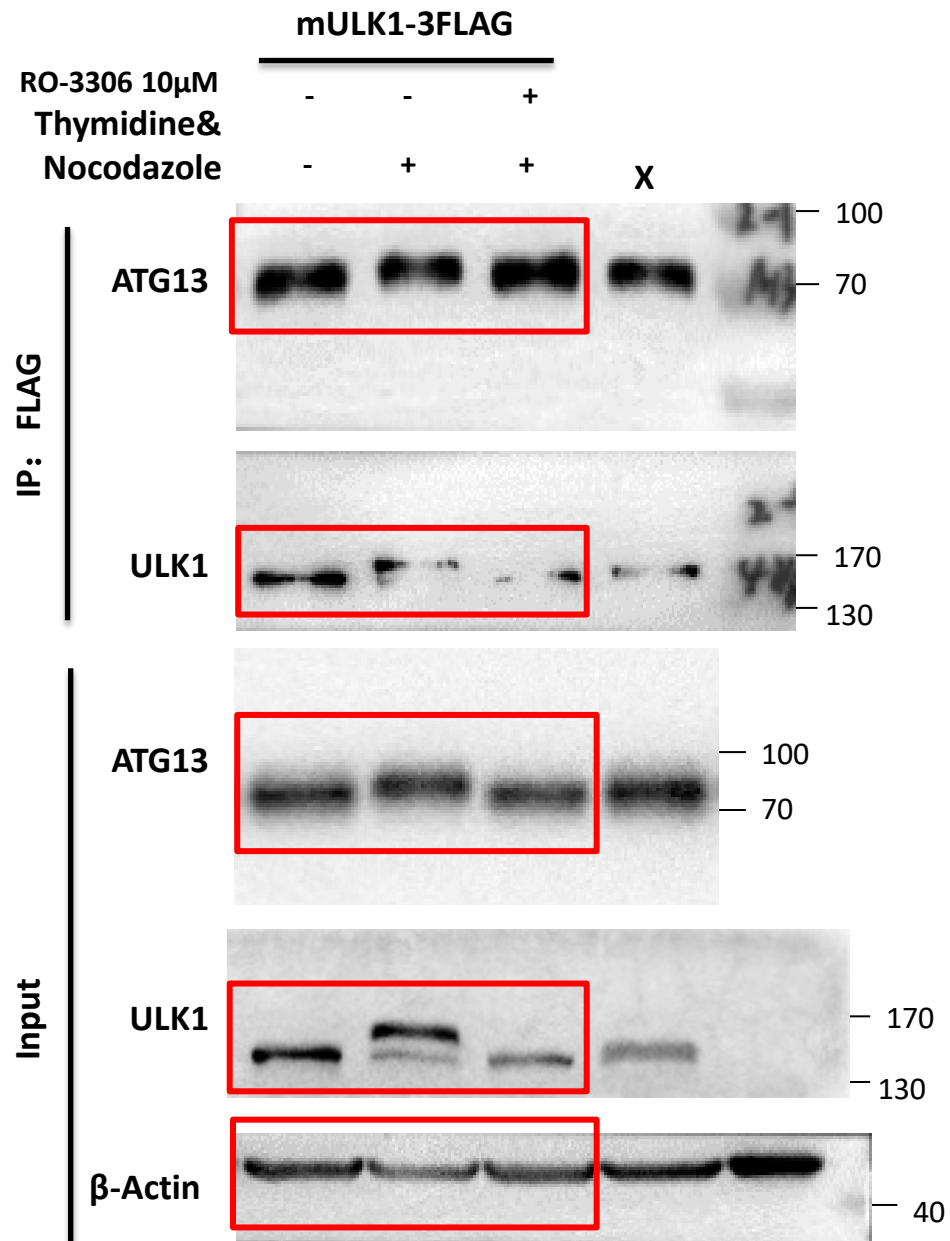

Images were acquired by chemiluminescence CCD camera-based digital imaging instruments (Tanon Fine-do X6).  
Approx. molecular weight ladder (L) was indicated.  
PVDF Membranes were cut for immunoblotting of more than one protein.

# S5C Fig

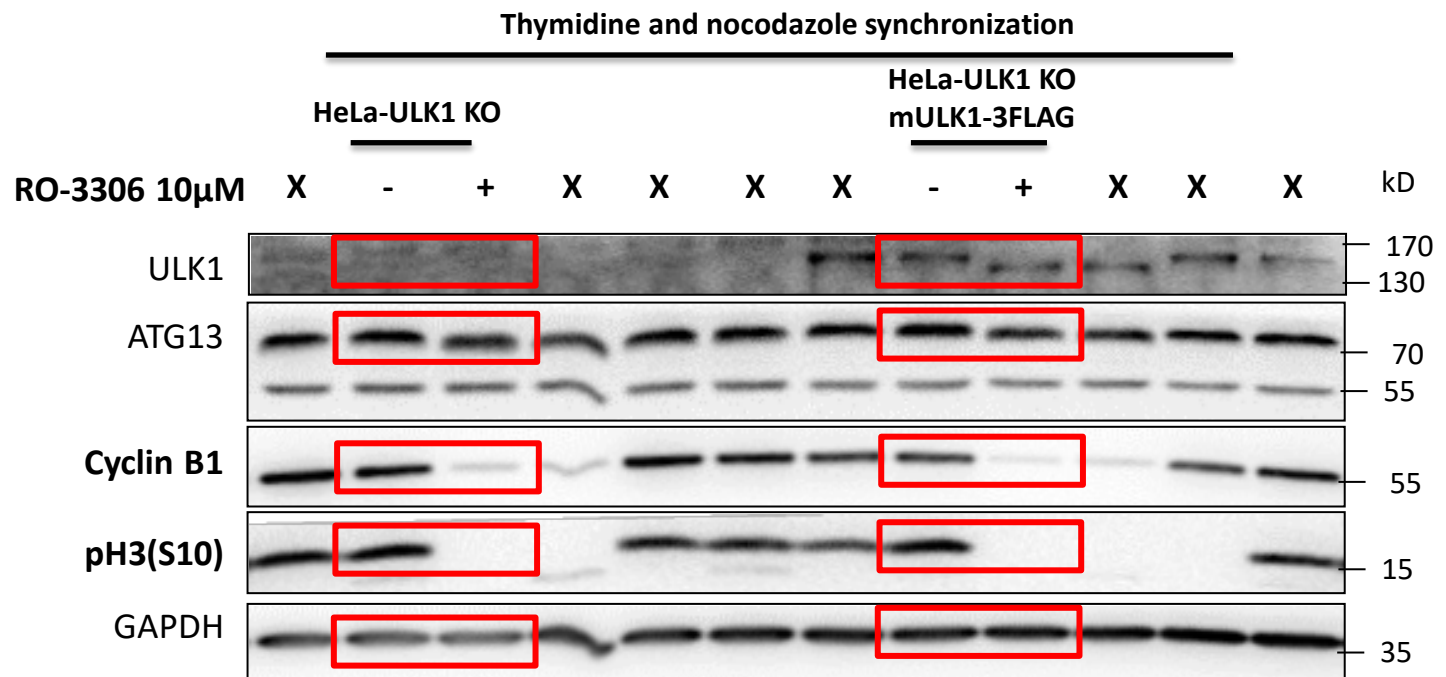

Images were acquired by chemiluminescence CCD camera-based digital imaging instruments (Tanon Fine-do X6). Approx. molecular weight ladder (L) was indicated. PVDF Membranes were cut for immunoblotting of more than one protein.

# S5D Fig

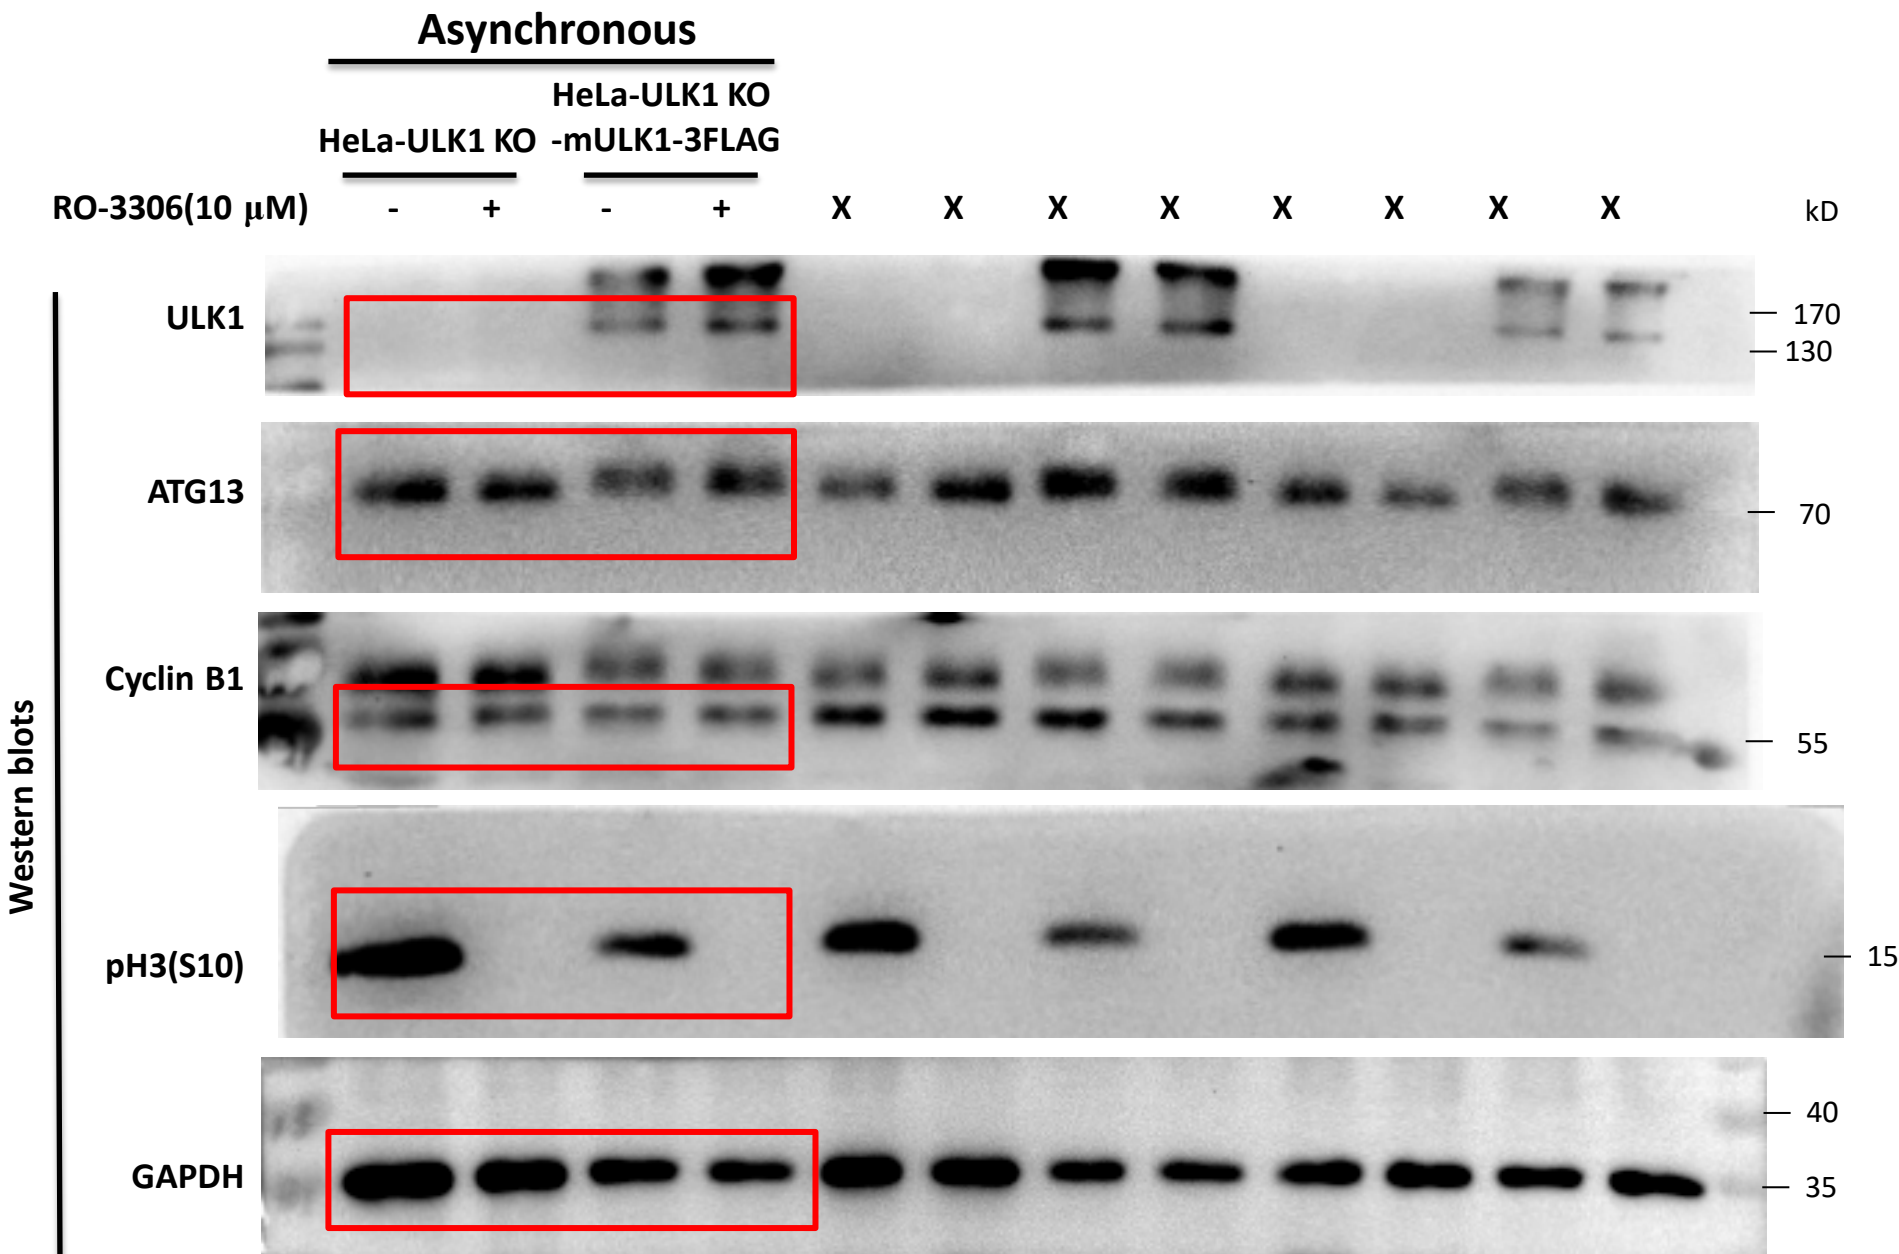

Images were acquired by chemiluminescence CCD camera-based digital imaging instruments (Tanon Fine-do X6). Approx. molecular weight ladder (L) was indicated. PVDF Membranes were cut for immunoblotting of more than one protein.

**S6A Fig**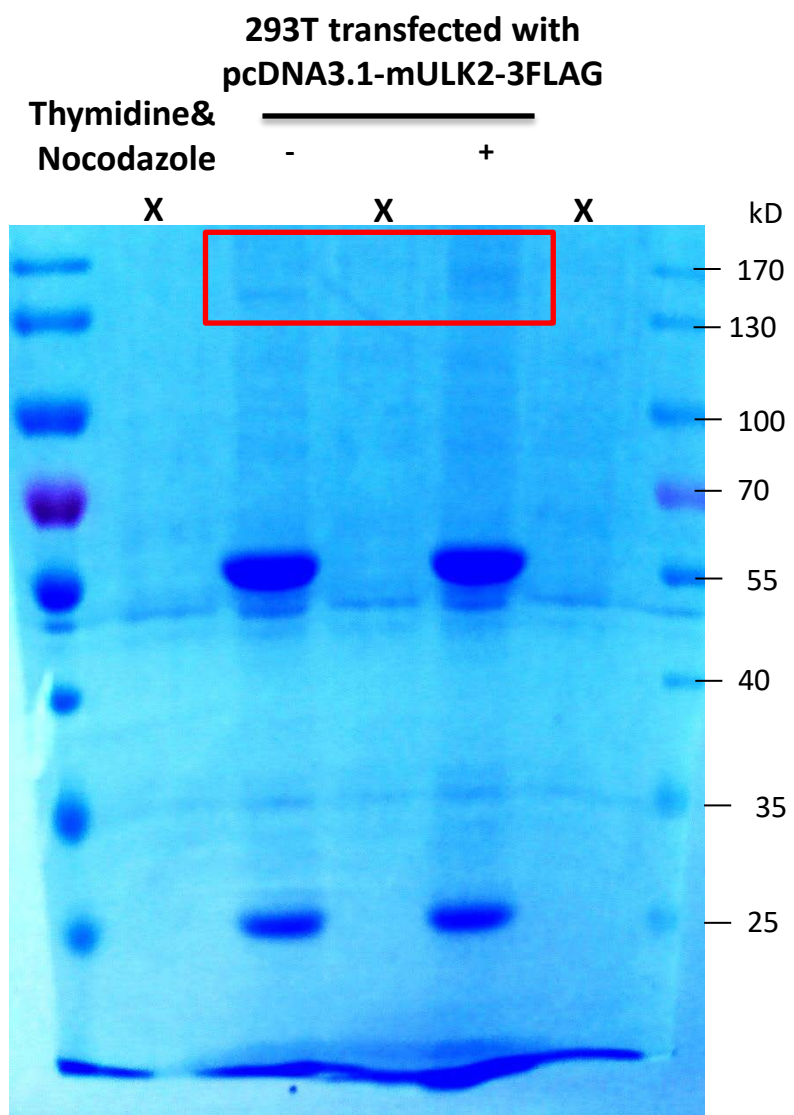**S6C Fig**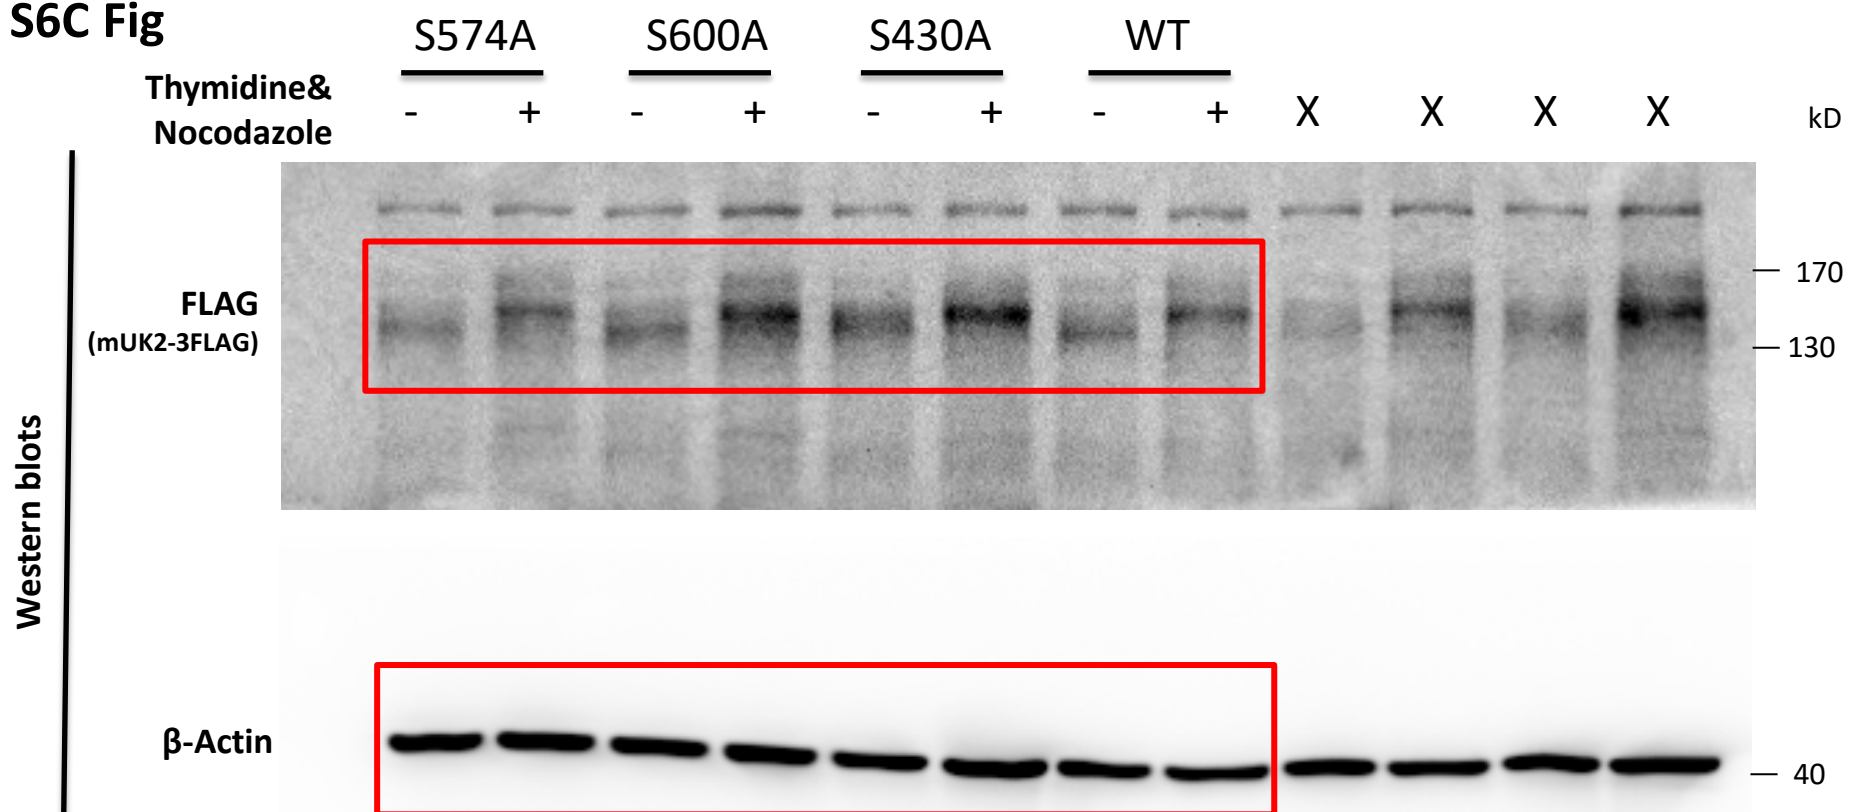

Images were acquired by chemiluminescence CCD camera-based digital imaging instruments (Tanon Fine-do X6). Approx. molecular weight ladder (L) was indicated. PVDF Membranes were cut for immunoblotting of more than one protein.

**S7 Fig**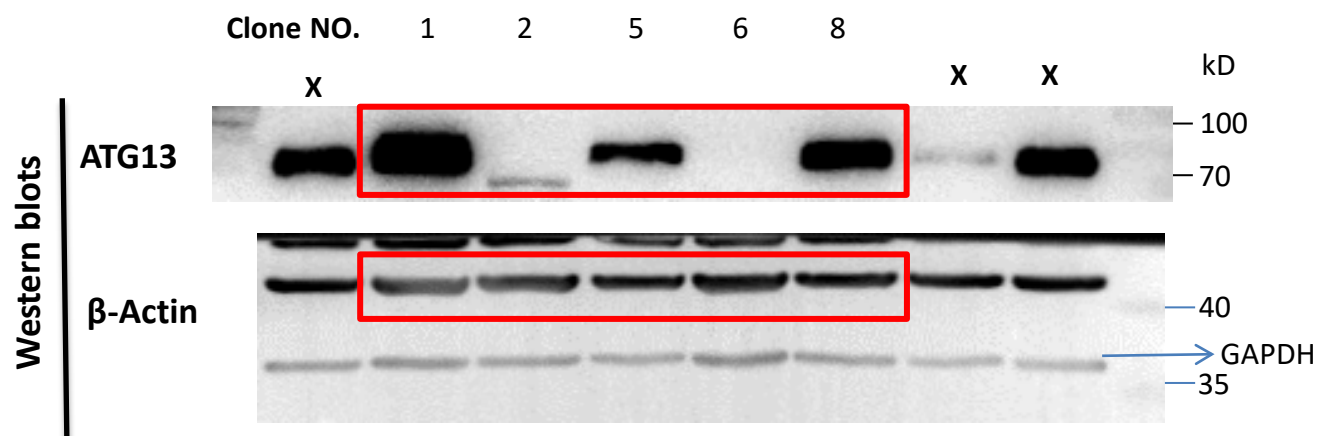**S10A Fig**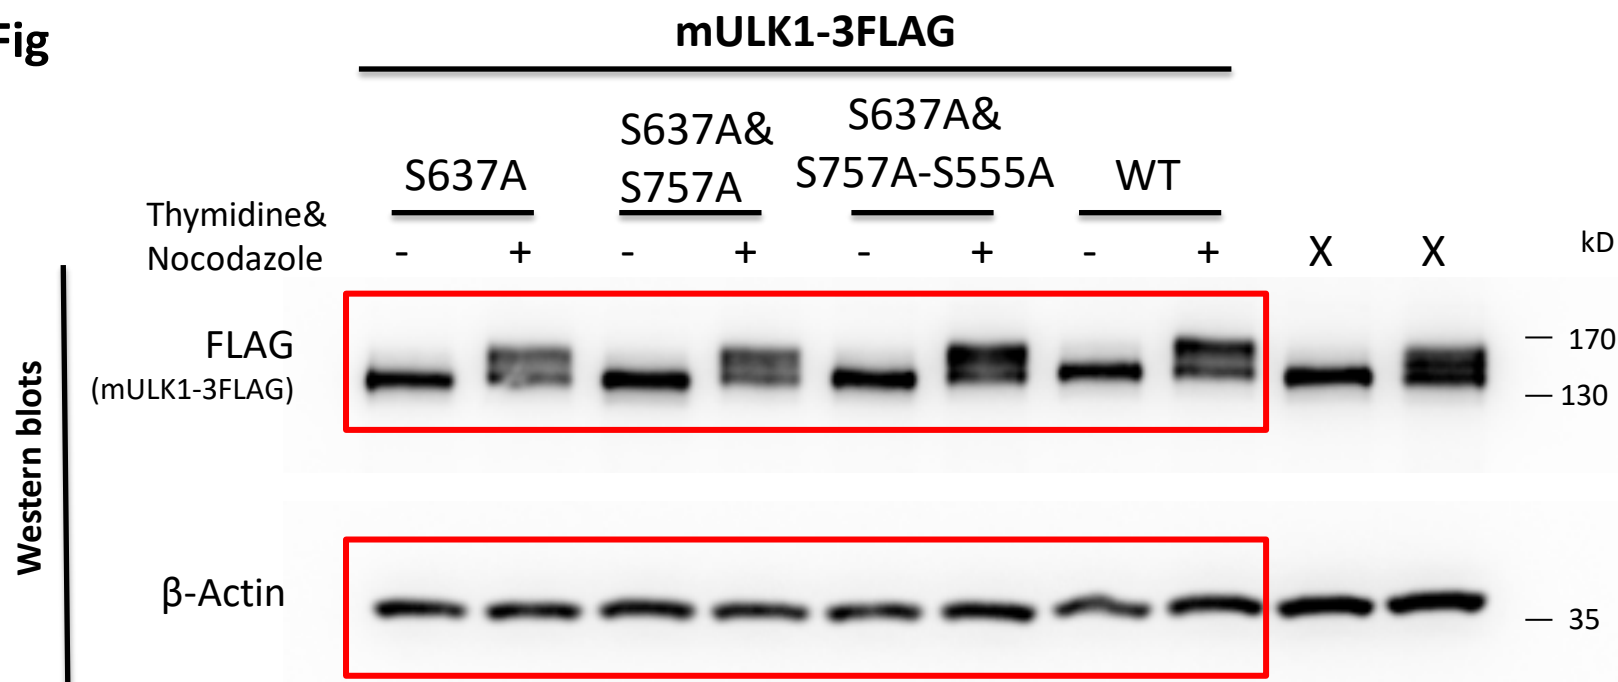**S10B Fig**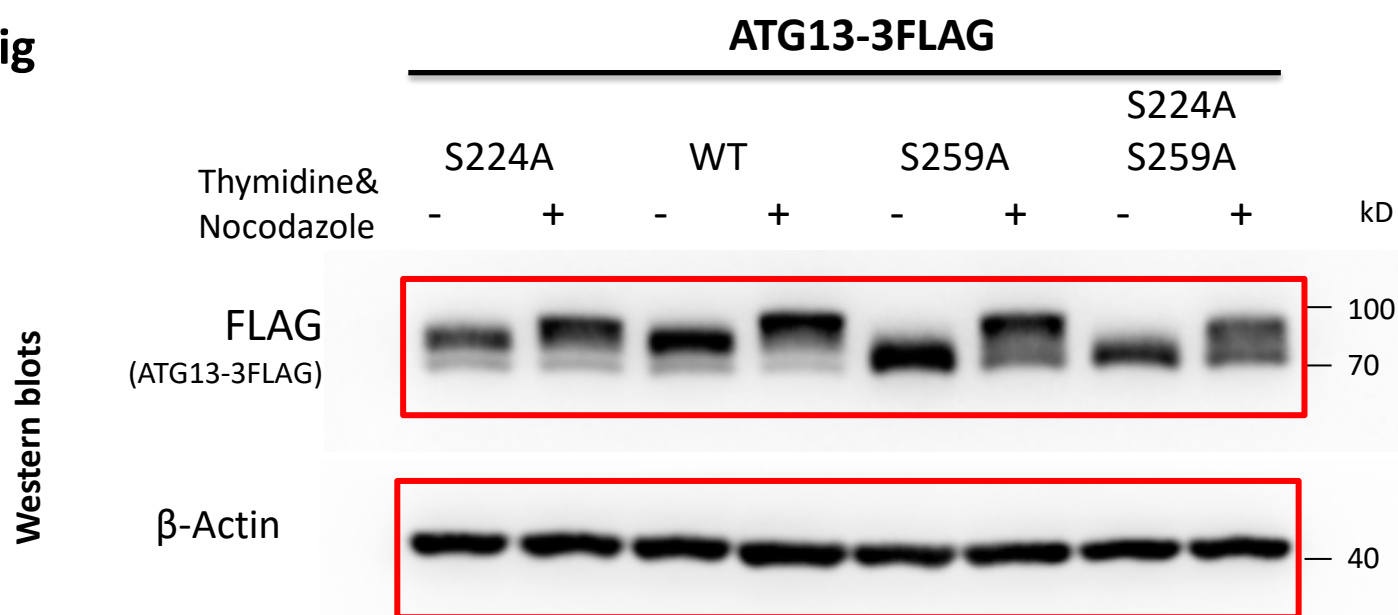

Images were acquired by chemiluminescence CCD camera-based digital imaging instruments (Tanon Fine-do X6). Approx. molecular weight ladder (L) was indicated. PVDF Membranes were cut for immunoblotting of more than one protein.

## S11A Fig

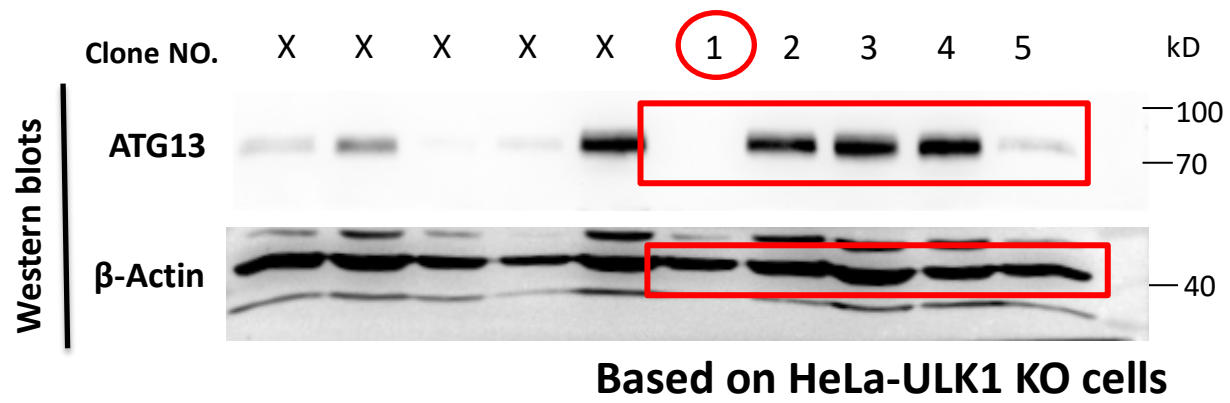

## S11B Fig

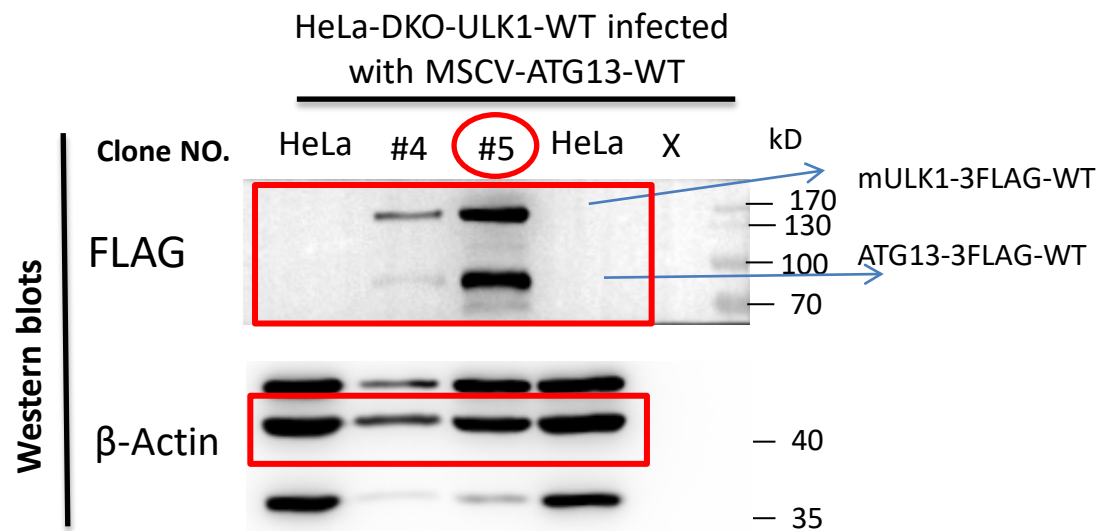

Images were acquired by chemiluminescence CCD camera-based digital imaging instruments (Tanon Fine-do X6). Approx. molecular weight ladder (L) was indicated. PVDF Membranes were cut for immunoblotting of more than one protein.

## S11C Fig

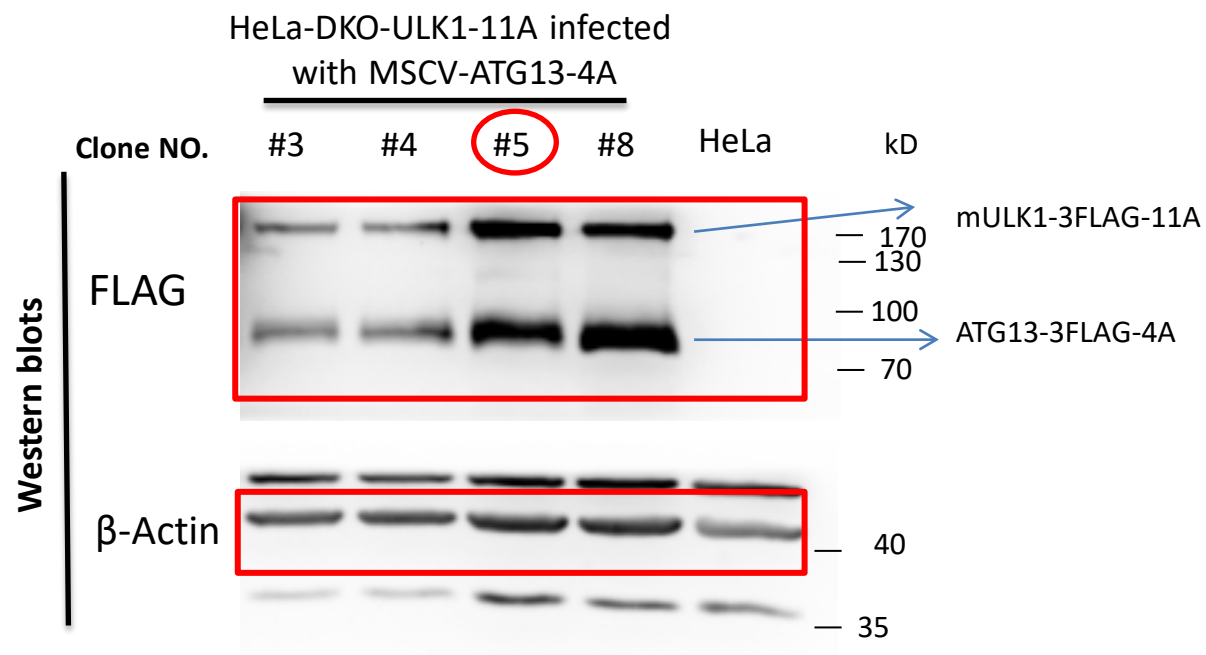

## S11D Fig

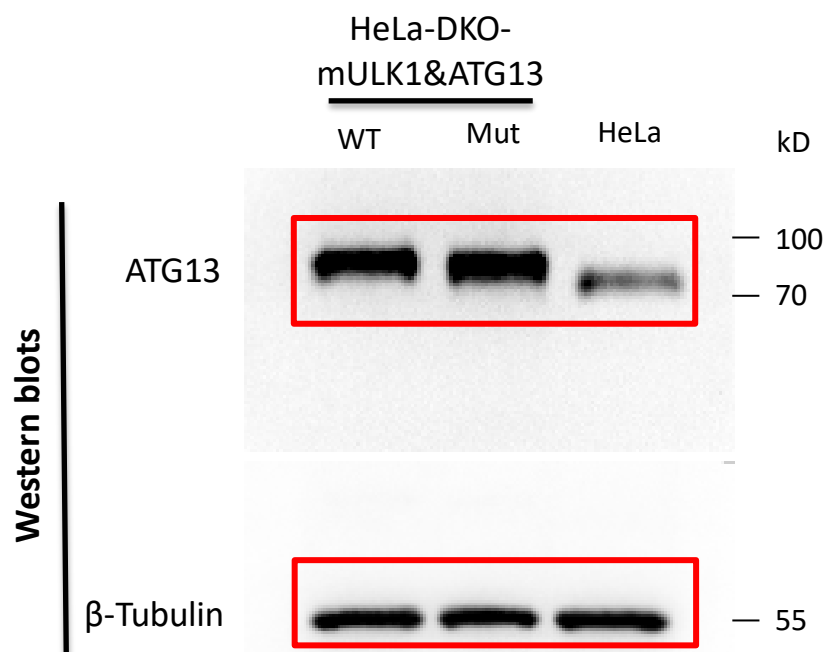

Images were acquired by chemiluminescence CCD camera-based digital imaging instruments (Tanon Fine-do X6).  
Approx. molecular weight ladder (L) was indicated.  
PVDF Membranes were cut for immunoblotting of more than one protein.



**S12A and S12B Fig**

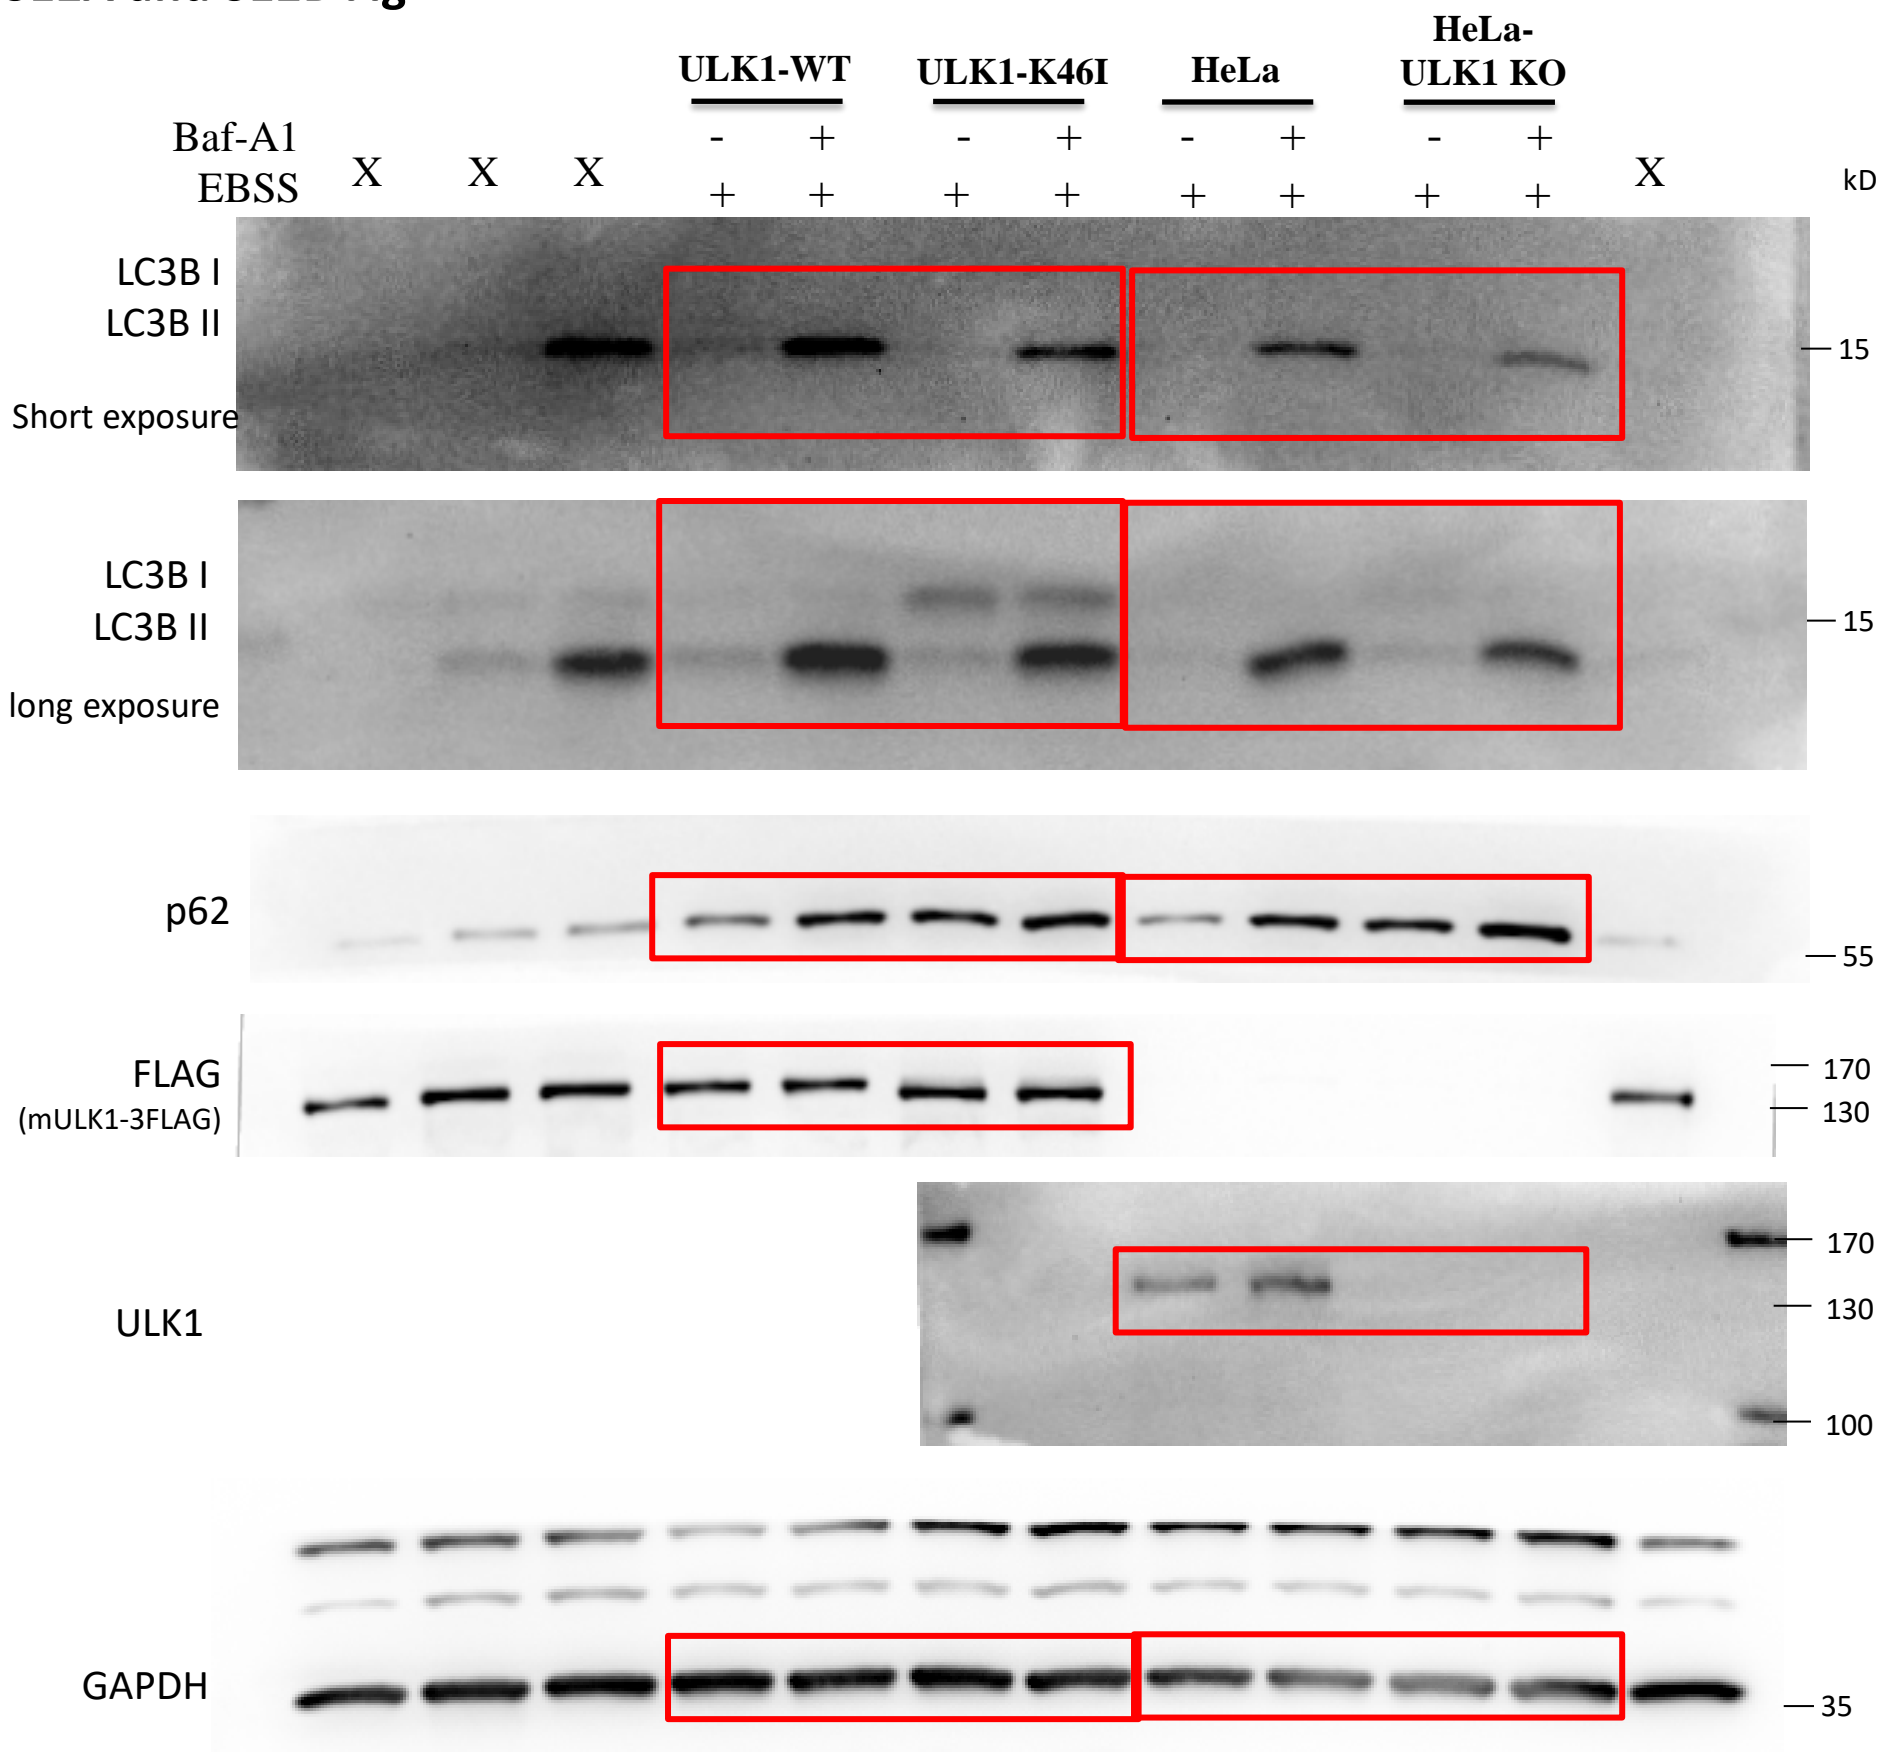

**Western blots**

Images were acquired by chemiluminescence CCD camera-based digital imaging instruments (Tanon Fine-do X6). Approx. molecular weight ladder (L) was indicated. PVDF Membranes were cut for immunoblotting of more than one protein.



# S12C Fig

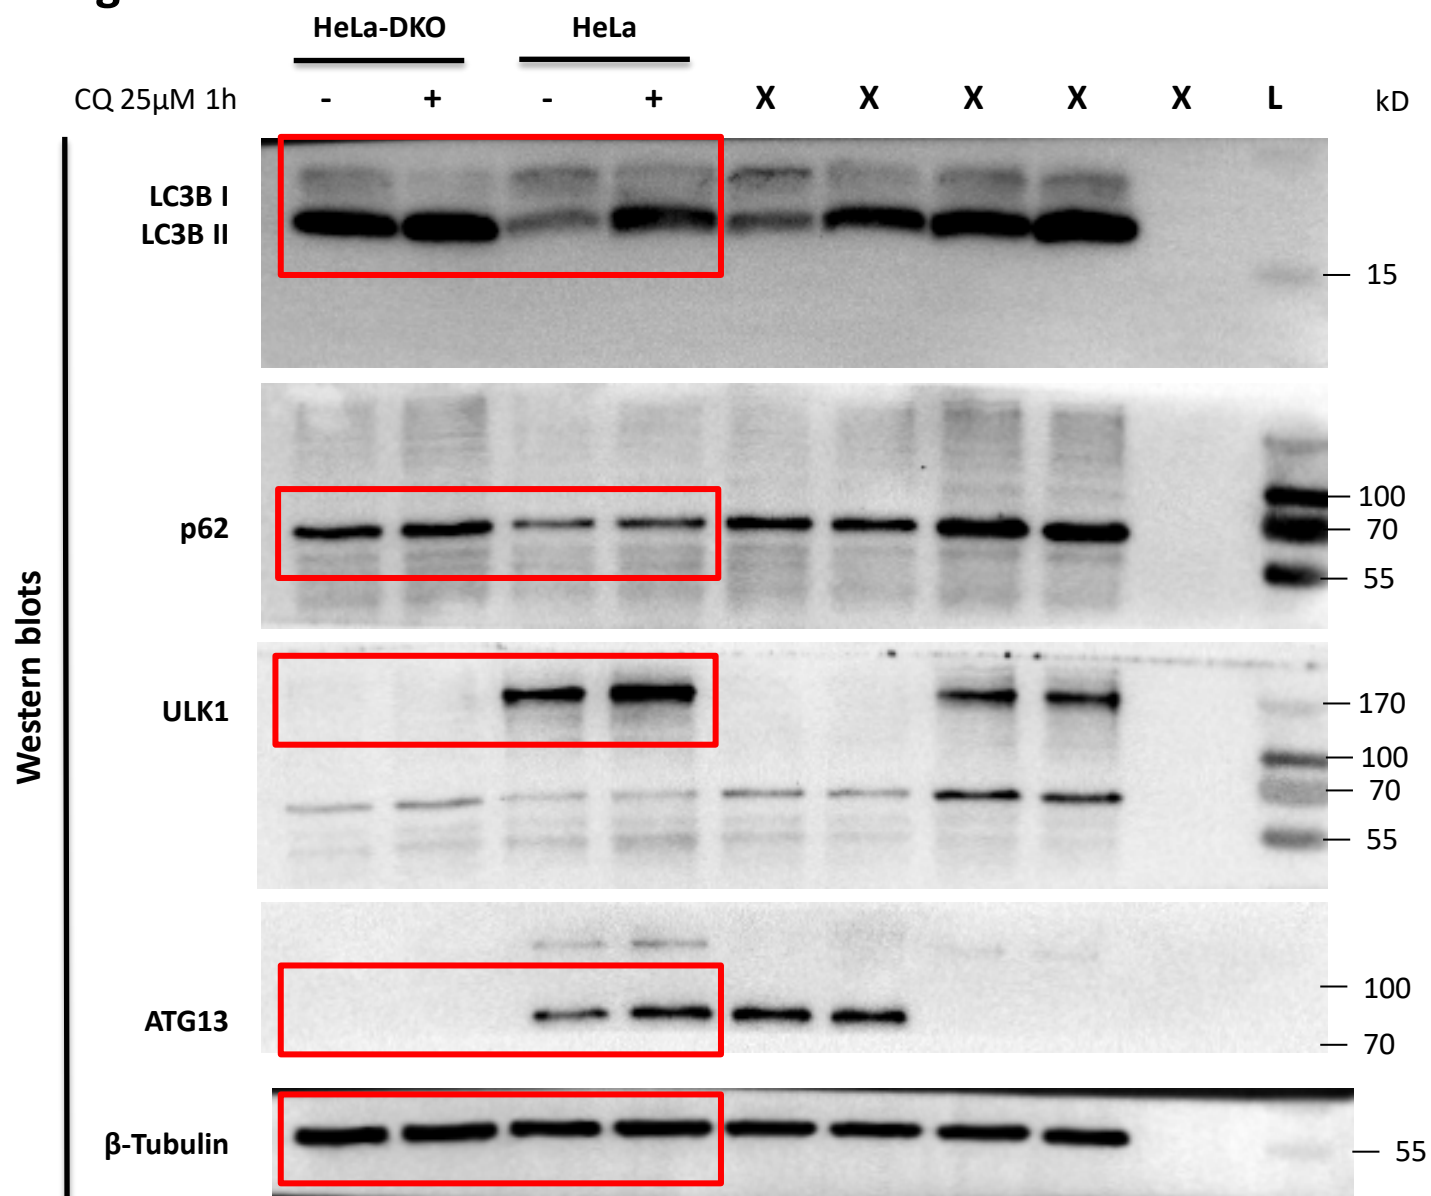

Images were acquired by chemiluminescence CCD camera-based digital imaging instruments (Tanon Fine-do X6).  
Approx. molecular weight ladder (L) was indicated.  
PVDF Membranes were cut for immunoblotting of more than one protein.

S14B Fig

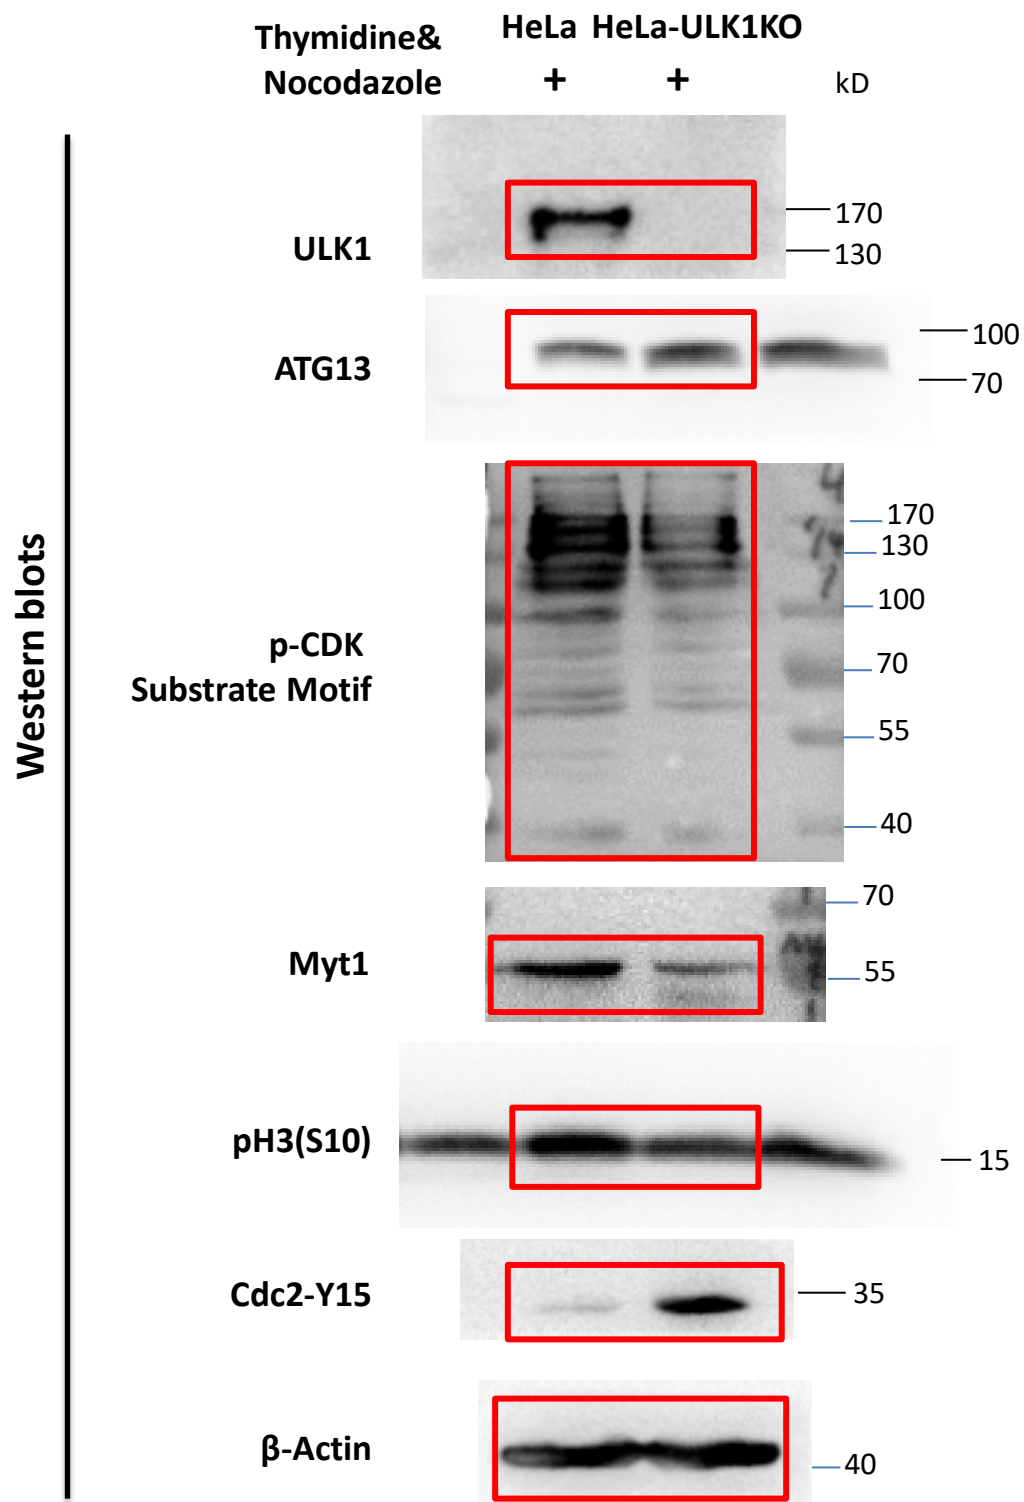

Images were acquired by chemiluminescence CCD camera-based digital imaging instruments (Tanon Fine-do X6). Approx. molecular weight ladder (L) was indicated. PVDF Membranes were cut for immunoblotting of more than one protein.

# S14D Fig

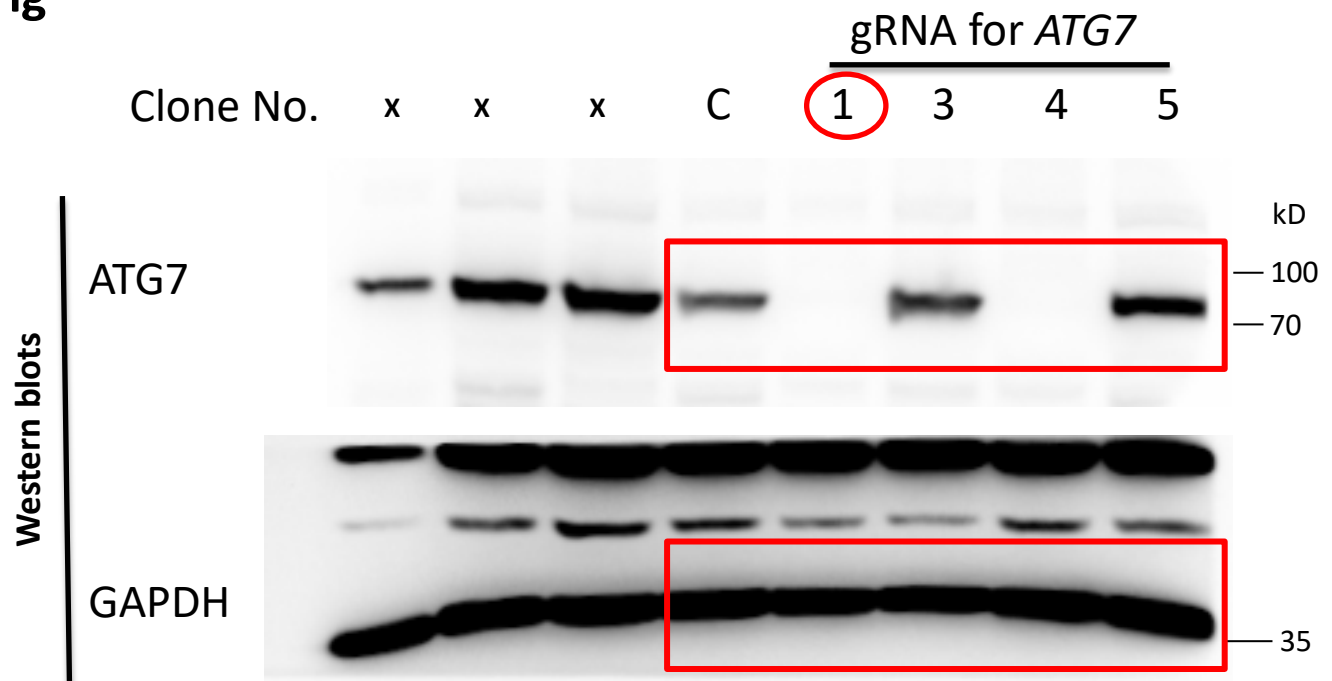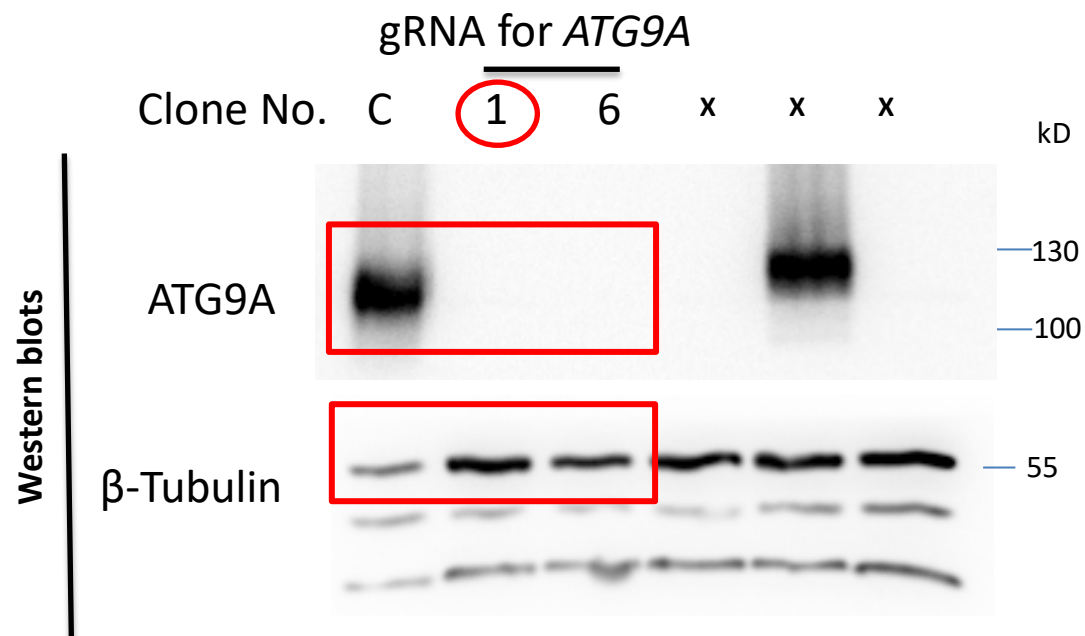

Images were acquired by chemiluminescence CCD camera-based digital imaging instruments (Tanon Fine-do X6). Approx. molecular weight ladder (L) was indicated. PVDF Membranes were cut for immunoblotting of more than one protein.

**S15B Fig**

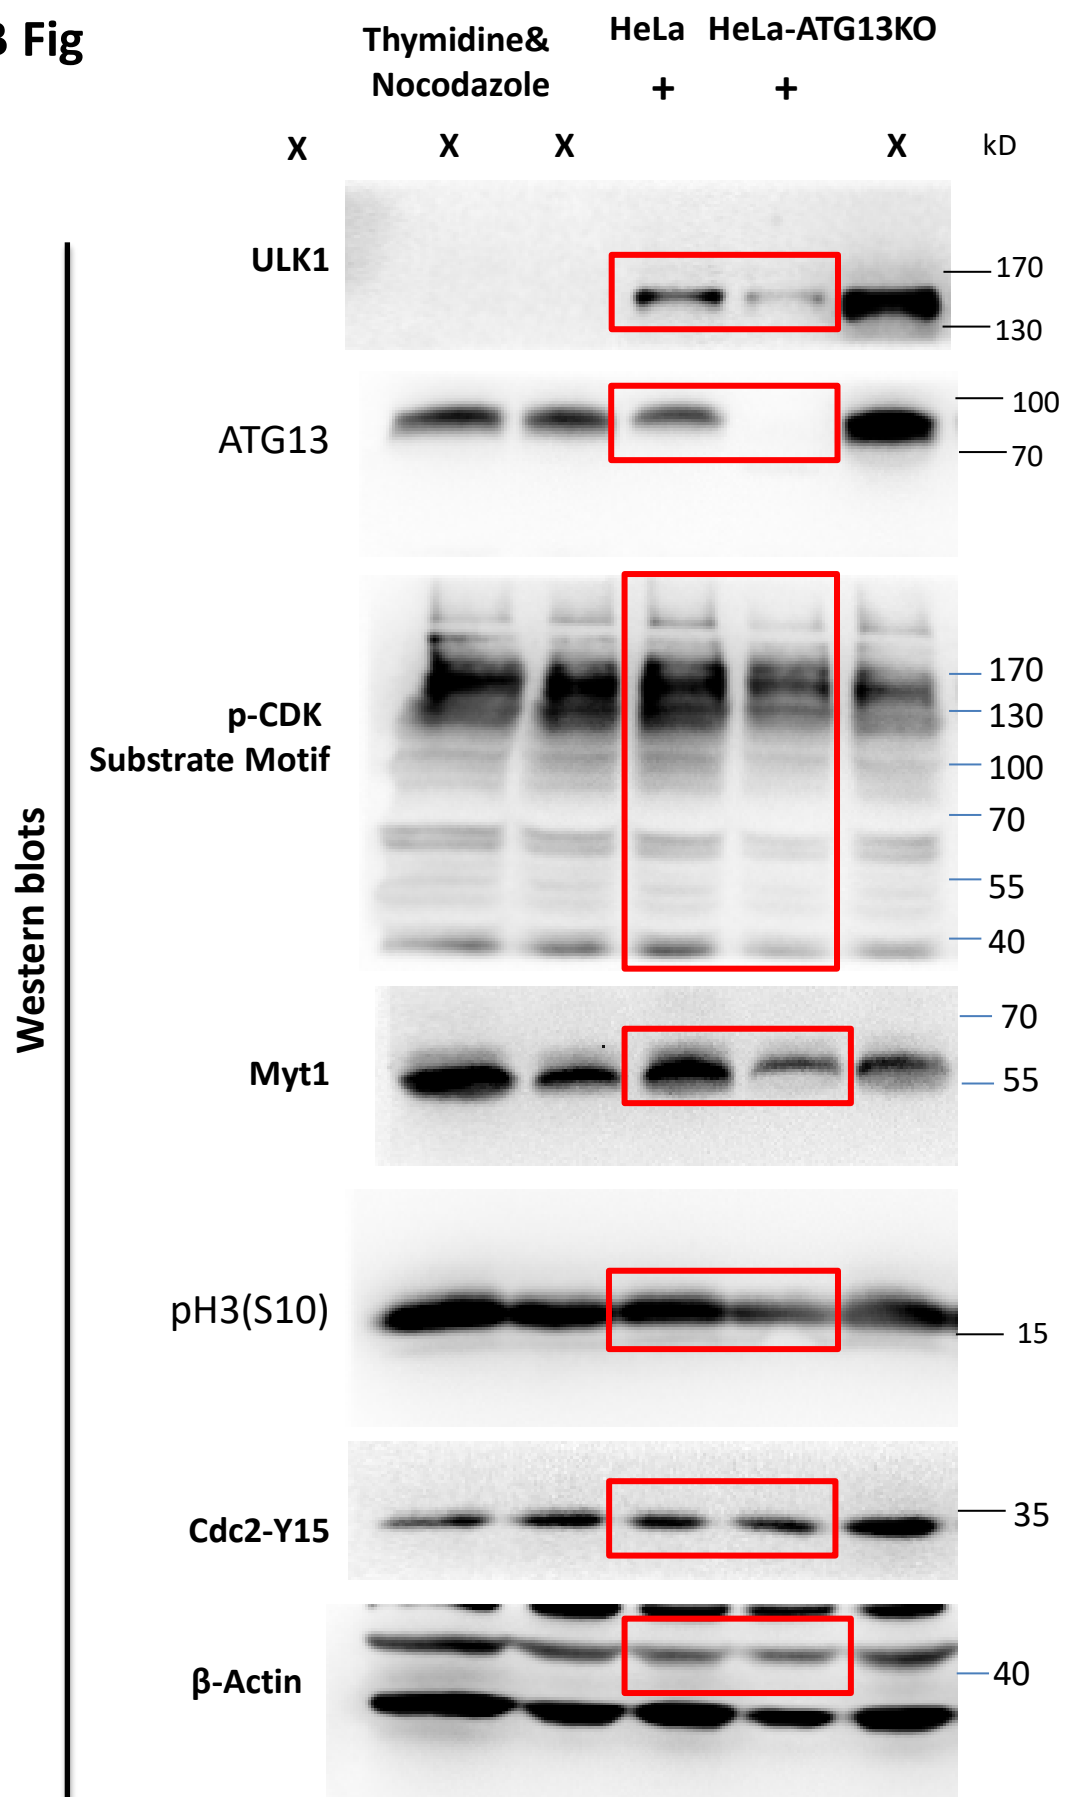

Images were acquired by chemiluminescence CCD camera-based digital imaging instruments (Tanon Fine-do X6). Approx. molecular weight ladder (L) was indicated. PVDF Membranes were cut for immunoblotting of more than one protein.

**S15D Fig**

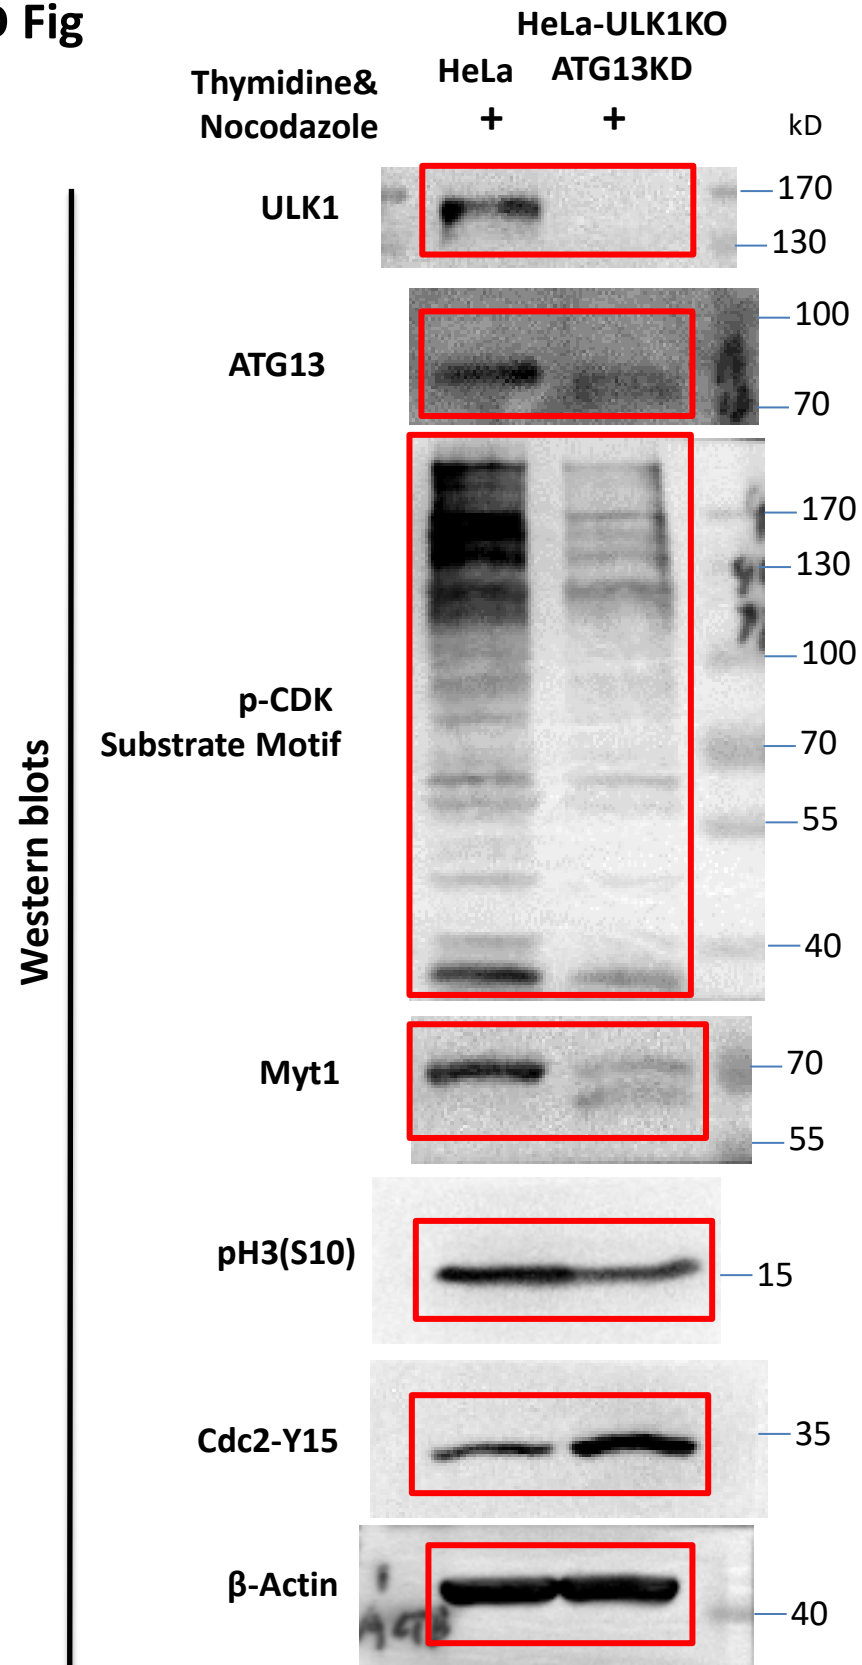

Images were acquired by chemiluminescence CCD camera-based digital imaging instruments (Tanon Fine-do X6). Approx. molecular weight ladder (L) was indicated. PVDF Membranes were cut for immunoblotting of more than one protein.
